# Supplementary material for: Dipeptides of S-Substituted Dehydrocysteine as Artzyme Building Blocks: Synthesis, Complexing Abilities and Antiproliferative Properties
Source: PubMed Central journal article supplement (PMC7927096; doi:10.3390/ijms22042168), 2021-02-22

# Supplementary Materials

## Dipeptides of *S*-substituted dehydrocysteine as artzyme building blocks: synthesis, complexing abilities and antiproliferative properties

Paweł Lenartowicz,<sup>\*[a]</sup> Mateusz Psurski,<sup>[b]</sup> Aleksandra Kotynia,<sup>[c]</sup> Aleksandra Pieniężna,<sup>[c]</sup> Monika Cuprych,<sup>[b]</sup> Klaudia Poniatowska,<sup>[b]</sup> Justyna Brasuń,<sup>[c]</sup> and Paweł Kafarski<sup>\*[d]</sup>

E-mail: [pawel.lenartowicz@uni.opole.pl](mailto:pawel.lenartowicz@uni.opole.pl) (P.L); [pawel.kafarski@pwr.edu.pl](mailto:pawel.kafarski@pwr.edu.pl) (P.K.)

### Table of contents

|                                                                |   |
|----------------------------------------------------------------|---|
| 1. General information .....                                   | 2 |
| 2. Discussion of NMR analysis .....                            | 2 |
| 3. Characterization of compounds .....                         | 4 |
| 4. <sup>1</sup> H NMR, <sup>13</sup> C NMR and IR spectra..... | 9 |

## 1. General information

All thiols (1H-1,2,4-triazole-3-thiol 97%, 4-phenylimidazole-2-thiol 97%, 5-methoxybenzoxazole-2-thiol 97%, 2-mercaptobenzothiazole 99%, 8-mercaptoadenine 95%, 5,5'-bis(mercaptomethyl)-2,2'-bipyridine 96%) were purchased from Merck (Sigma Poland). The solvents: acetonitrile (ACN), dichloromethane (DCM), chloroform (CHL), ethyl acetate (EtOAc) were refluxed over P<sub>2</sub>O<sub>5</sub> and distilled. The reaction progress was monitored by thin layer chromatography on Merck 60 silica plates with fluorescent indicator. The spots were additionally visualized with potassium permanganate solution or by chlorine/*o*-tolidine reaction. The compounds were purified by flash chromatography using silica gel 60 (0.040-0.063 mm) from Merck. The NMR analyses were performed on a Bruker Ultrashield 400 MHz spectrometer operating at 400 MHz (<sup>1</sup>H) and 101 MHz (<sup>13</sup>C). The samples were prepared in d<sub>6</sub>-DMSO (99.8 at. %D) containing 0.03% TMS and measured at 297 K. High-resolution mass spectra (HRMS) were recorded on a Waters LCT Premier XE mass spectrometer equipped with an ESI source in the positive ion mode (Waters, Milford, MA, USA). IR spectra were recorded on Nicolet 6700 FT-IR spectrophotometer (Thermo Scientific) operating at resolution 2 cm<sup>-1</sup> and scanning range 4000 – 400 cm<sup>-1</sup>. Samples were measured as KBr disks.

## 2. Discussion of NMR analysis

The structures of obtained compounds were confirmed by <sup>1</sup>H and <sup>13</sup>C NMR analysis. However, the <sup>13</sup>C NMR spectra of compound **6a**, **6e**, **7a** and **7e** recorded upon standard time (up to 1 hour) revealed that some carbon signals are missing. The extension of experiment time to 15 hours for compound **7a** and **7e** let to recording spectra, in which missed signals derived from *S*-substituted dehydrocysteine fragment appeared as broad peaks with low intensity (Fig. SI1). This observation could be explained by presence in the structure a large number of nitrogen atoms in aromatic fragment which affect the relaxation time.

The addition-elimination reaction of thiols to β-bromodehydroalaniates could produce two geometrical isomers. The determination of *Z*, *E* configuration of two representative compounds **6a** and **7a** was performed by NOE difference NMR experiment (Fig SI2). The irradiation of amide proton of **6a** (9.5 ppm) gave three positive signals derived from protons connected to methylene group of glycine, urethane and *tert*-butyl groups. In the case of **7a**, irradiation of amide proton gave only one positive peak derived from protons of *tert*-butyl groups. In the second experiment, in which vinyl proton of dehydrocysteine (8.00 ppm) was irradiated, two positive peaks derived from protons of *tert*-butyl and methyl groups were observed for both products. Moreover, all NMR experiments showed that there is no interaction between amide and vinyl proton. Thus, the configuration of prepared compounds was determined as *Z*. This is in a good accordance with our expectation because *Z* dehydropeptides are more thermodynamically favorable than *E* isomers.

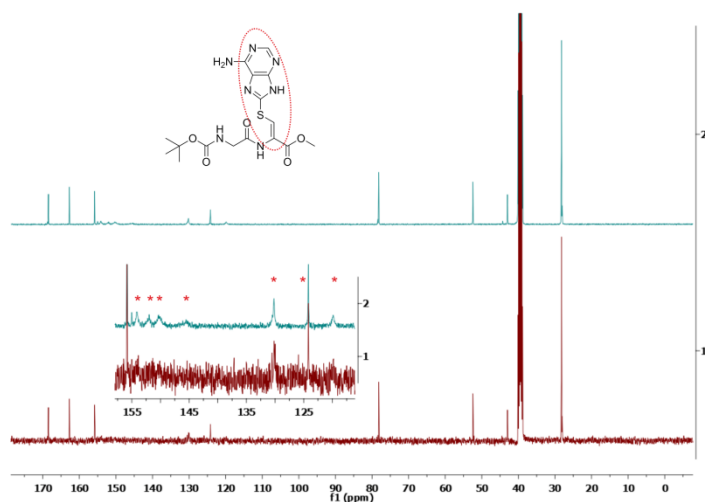

**Figure S1**  $^{13}\text{C}$  NMR spectra for dipeptide **6e** containing adenine residue performed with different experimental time: 1 – one hour; 2 – fifteen hours. The signals derived from carbon atoms of S-substituted dehydrocysteine fragment are marked by asterisks.

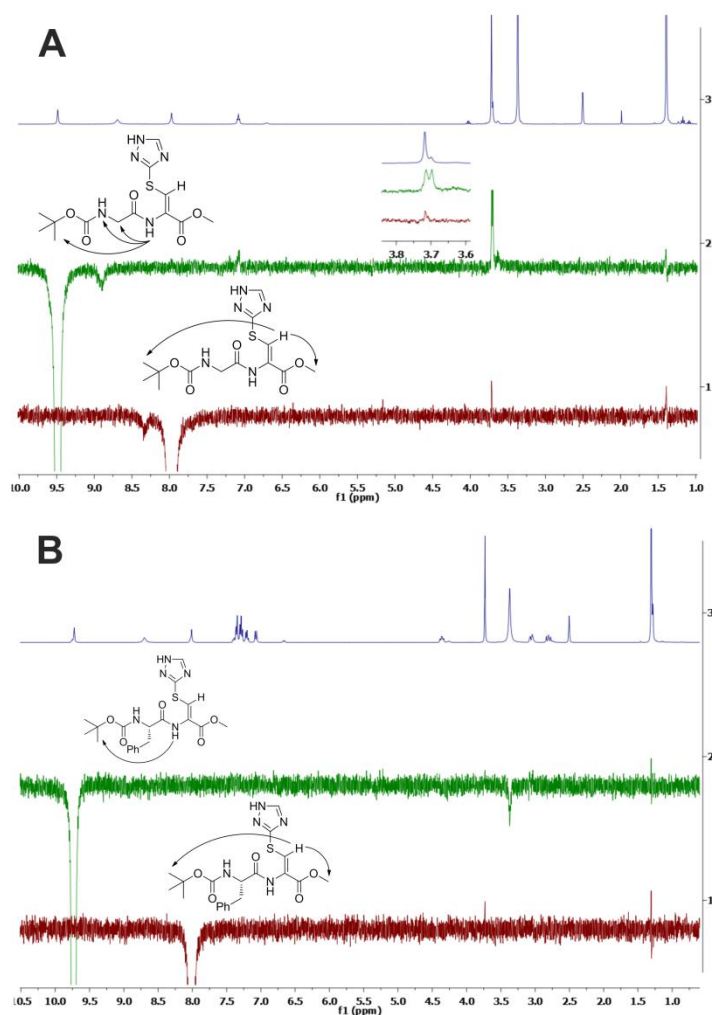

**Figure S2** NOE difference NMR spectra for dipeptides **6a** (panel A) and **7a** (panel B). The range of ppm axis is set up for better readability at 0.5-10.5 ppm. The signal derived from  $\text{NH}_{\text{triazole}}$  (14.4 ppm) is omitted.

### 3. Characterization of compounds

#### Boc-Gly- $\Delta$ Cys(S-triazole)-OMe (6a)

Synthesis was performed using dehyropeptide (0.337 g, 1 mmol), 1H-1,2,4-triazole-3-thiol (0.110 g, 1.05 mmol), K<sub>2</sub>CO<sub>3</sub> (0.276 g, 2 mmol), ACN (10 ml). The product (0.331 g, 0.93 mol) was obtained as white solid with yield 93%.

Flash chromatography: increasing gradient of A (10% MeOH in EtOAc) in B (CHL) (0→100%). TLC: 5% MeOH/45% EtOAc/50% CHL, R<sub>f</sub> = 0.20.

<sup>1</sup>H NMR (400 MHz, DMSO)  $\delta$  14.41 (s, 1H), 9.48 (s, 1H), 8.70 (s, 1H), 7.98 (s, 1H), 7.08 (t, *J* = 5.7 Hz, 1H), 3.71 (d and s overlapped, 5H), 1.39 ppm (s, 9H).

<sup>13</sup>C NMR (101 MHz, DMSO)  $\delta$  168.32, 162.69, 155.84, 145.52, 131.40, 123.64, 78.14, 52.40, 43.00, 28.23 ppm.

IR  $\nu$  (KBr disk, cm<sup>-1</sup>): 3378, 3275, 2979, 2933, 1716, 1695, 1511, 1438, 1368, 1328, 1279, 1249, 1165  
HRMS (ESI): *m/z* calcd for C<sub>13</sub>H<sub>19</sub>N<sub>5</sub>O<sub>5</sub>S+H<sup>+</sup>: 358.1180 [*M*+H]<sup>+</sup>; found: 358.1190.

#### Boc-Gly- $\Delta$ Cys(S-4-phenylimidazole)-OMe (6b)

Synthesis was performed using dehyropeptide (0.337 g, 1 mmol), 4-phenylimidazole-2-thiol (0.191 g, 1.05 mmol), K<sub>2</sub>CO<sub>3</sub> (0.276 g, 2 mmol), ACN (10 ml). The product (0.402 g, 0.93 mol) was obtained as white solid with yield 93%.

Flash chromatography: increasing gradient of EtOAc in CHL (0→100%). TLC: 60% EtOAc in CHL, R<sub>f</sub> = 0.32.

<sup>1</sup>H NMR (400 MHz, DMSO)  $\delta$  12.85 (s, 1H), 9.50 (s, 1H), 7.91 – 7.31 (m and s overlapped, 6H), 7.31 – 7.16 (m, 1H), 7.09 (t, *J* = 6.1 Hz, 1H), 3.72 (d, *J* = 6.1 Hz, 2H), 3.71 (s, 3H), 1.40 ppm (s, 9H).

<sup>13</sup>C NMR (101 MHz, DMSO)  $\delta$  168.33, 162.73, 155.85, 141.97, 136.28, 133.91, 132.93, 128.60, 126.59, 124.30, 123.22, 116.06, 78.15, 52.38, 42.98, 28.25 ppm.

IR  $\nu$  (KBr disk, cm<sup>-1</sup>): 3381, 3188, 2978, 1721, 1687, 1497, 1450, 1438, 1368, 1323, 1247, 1167, 763.  
HRMS (ESI): *m/z* calcd for C<sub>20</sub>H<sub>24</sub>N<sub>4</sub>O<sub>5</sub>S+H<sup>+</sup>: 433.1540 [*M*+H]<sup>+</sup>; found: 433.1541.

#### Boc-Gly- $\Delta$ Cys(S-5-methoxybenzoxazole)-OMe (6c)

Synthesis was performed using dehyropeptide (0.337 g, 1 mmol), 5-methoxybenzoxazole-2-thiol (0.196 g, 1.05 mmol), K<sub>2</sub>CO<sub>3</sub> (0.276 g, 2 mmol), ACN (10 ml). The product (0.394 g, 0.90 mol) was obtained as white solid with yield 90%.

Flash chromatography: increasing gradient of EtOAc in CHL (0→50%). TLC: 50% EtOAc in CHL, R<sub>f</sub> = 0.38.

<sup>1</sup>H NMR (400 MHz, DMSO)  $\delta$  9.80 (s, 1H), 7.91 (s, 1H), 7.62 (d, *J* = 8.9 Hz, 1H), 7.33 (d, *J* = 2.5 Hz, 1H), 7.15 (t, *J* = 6.1 Hz, 1H), 6.95 (dd, *J* = 8.9, 2.5 Hz, 1H), 3.80 (s, 3H), 3.79 (s, 3H), 3.75 (d, *J* = 6.1 Hz, 2H), 1.40 ppm (s, 9H).

<sup>13</sup>C NMR (101 MHz, DMSO)  $\delta$  168.71, 162.43, 160.88, 157.24, 155.89, 146.01, 141.79, 126.58, 124.23, 112.85, 110.86, 102.53, 78.22, 55.87, 52.85, 43.14, 28.21 ppm.

IR  $\nu$  (KBr disk, cm<sup>-1</sup>): 3321, 3253, 2979, 1720, 1679, 1532, 1505, 1484, 1437, 1321, 1289, 1249, 1155, 750.

HRMS (ESI): *m/z* calcd for C<sub>19</sub>H<sub>23</sub>N<sub>3</sub>O<sub>7</sub>S+H<sup>+</sup>: 438.1329 [*M*+H]<sup>+</sup>; found: 438.1339.

### Boc-Gly- $\Delta$ Cys(S-benzothiazole)-OMe (6d)

Synthesis was performed using dehyropeptide (0.169 g, 0.5 mmol), 2-mercaptobenzothiazole (0.090 g, 525  $\mu$ mol),  $K_2CO_3$  (0.138 g, 1 mmol), ACN (6 ml). The product (0.175 g, 0.41  $\mu$ mol) was obtained as white solid with yield 82%.

Flash chromatography: increasing gradient of EtOAc in DCM (0 $\rightarrow$ 40%). TLC: 30% EtOAc in DCM,  $R_f$  = 0.42.

$^1H$  NMR (400 MHz, DMSO)  $\delta$  9.76 (s, 1H), 8.10 (d,  $J$  = 7.4 Hz, 1H), 8.02 (s, 1H), 7.99 (d,  $J$  = 7.9 Hz, 1H), 7.57 – 7.50 (m, 1H), 7.48 – 7.40 (m, 1H), 7.13 (t,  $J$  = 6.1 Hz, 1H), 3.78 (s, 3H), 3.74 (d,  $J$  = 6.1 Hz, 2H), 1.40 ppm (s, 9H).

$^{13}C$  NMR (101 MHz, DMSO)  $\delta$  168.55, 162.62, 162.46, 155.87, 152.36, 134.97, 126.86, 126.14, 125.91, 125.30, 122.30, 121.90, 78.21, 52.79, 43.12, 28.23 ppm.

IR  $\nu$  (KBr disk,  $cm^{-1}$ ): 3333, 3270, 2979, 1722, 1681, 1529, 1463, 1427, 1368, 1318, 1274, 1172, 994, 757.

HRMS (ESI):  $m/z$  calcd for  $C_{18}H_{21}N_3O_5S_2+H^+$ : 424.0995 [ $M+H$ ] $^+$ ; found: 424.1010.

### Boc-Gly- $\Delta$ Cys(S-adenine)-OMe (6e)

Synthesis was performed using dehyropeptide (0.337 g, 1 mmol), 8-mercaptoadenine (0.185 g, 1.05 mmol),  $K_2CO_3$  (0.276 g, 2 mmol), ACN (10 ml) and DMF extra dry (1 ml). In order to remove DMF the residue remained after solvent evaporation was dissolved in EtOAc and washed with brine and dried with anhydrous  $MgSO_4$ . Then chromatographic purification was performed. The product (0.260 g, 0.61  $\mu$ mol) was obtained as white solid with yield 61%.

Flash chromatography: increasing gradient of MeOH in DCM (0 $\rightarrow$ 20%). TLC: 10% MeOH in DCM,  $R_f$  = 0.23.

$^1H$  NMR (400 MHz, DMSO)  $\delta$  13.49 (s, 1H), 9.56 (s, 1H), 8.11 (2 x s overlapped, 2H), 7.36 (s, 2H), 7.10 (t,  $J$  = 6.1 Hz, 1H), 3.77 – 3.63 (s and d overlapped, 5H), 1.39 ppm (s, 9H).

$^{13}C$  NMR (101 MHz, DMSO, measurement time 15 h)  $\delta$  168.48, 162.76, 155.87, 154.21 broad, 152.02 broad, 150.38 broad, 145.62 broad, 130.22 broad, 124.22, 119.89 broad, 78.19, 52.47, 43.02, 28.26 ppm.

IR  $\nu$  (KBr disk,  $cm^{-1}$ ): 3496, 3399, 3362, 3204, 2977, 1723, 1659, 1603, 1564, 1495, 1436, 1367, 1322, 1251, 1168

HRMS (ESI):  $m/z$  calcd for  $C_{16}H_{21}N_7O_5S+H^+$ : 424.1398 [ $M+H$ ] $^+$ ; found: 424.1397.

### Boc-Phe- $\Delta$ Cys(S-triazole)-OMe (7a)

Synthesis was performed using dehyropeptide (0.427 g, 1 mmol), 1H-1,2,4-triazole-3-thiol (0.110 g, 1.05 mmol),  $K_2CO_3$  (0.276 g, 2 mmol), ACN (10 ml). The product (0.419 g, 0.94  $\mu$ mol) was obtained as white solid with yield 94%.

Flash chromatography: increasing gradient of MeOH in DCM (0 $\rightarrow$ 5%). TLC: 5% MeOH in DCM,  $R_f$  = 0.30.

$^1H$  NMR (400 MHz, DMSO)  $\delta$  14.42 (s, 1H), 9.72 (s, 1H), 8.70 (s, 1H), 8.01 (s, 1H), 7.42 – 7.16 (m, 5H), 7.07 (d,  $J$  = 8.7 Hz, 1H), 4.40 – 4.31 (m, 1H), 3.73 (s, 3H), 3.05 (dd,  $J$  = 13.7, 3.7 Hz, 1H), 2.80 (dd,  $J$  = 13.7, 11.0 Hz, 1H), 1.30 ppm (s, 3H).

$^{13}C$  NMR (101 MHz, DMSO)  $\delta$  170.90, 162.74, 155.39, 145.52 broad, 138.11, 131.45 broad, 129.33, 128.08, 126.30, 123.68 broad, 78.09, 55.83, 52.42, 37.46, 28.18 ppm.

IR  $\nu$  (KBr disk,  $cm^{-1}$ ): 3319, 2979, 2931, 1690, 1669, 1517, 1498, 1438, 1367, 1329, 1278, 1248, 1165

HRMS (ESI):  $m/z$  calcd for  $C_{20}H_{25}N_5O_5S+H^+$ : 448.1649 [ $M+H$ ] $^+$ ; found: 448.1656.

### Boc-Phe- $\Delta$ Cys(S-4-phenylimidazole)-OMe (7b)

Synthesis was performed using dehyropeptide (0.214 g, 0.5 mmol), 4-phenylimidazole-2-thiol (0.095 g, 0.525 mmol), K<sub>2</sub>CO<sub>3</sub> (0.138 g, 1 mmol), ACN (6 ml). The product (0.227 g, 0.43 mol) was obtained as white solid with yield 86%.

Flash chromatography: increasing gradient of EtOAc in DCM (0→50%). TLC: 20% EtOAc in DCM, R<sub>f</sub> = 0.24.

<sup>1</sup>H NMR (400 MHz, DMSO)  $\delta$  12.86 (s, 1H), 9.74 (s, 1H), 7.83 – 7.18 (m set overlapped, 12H), 7.08 (d, *J* = 8.8 Hz, 1H), 4.44 – 4.33 (m, 1H), 3.72 (s, 3H), 3.08 (dd, *J* = 13.7, 3.3 Hz, 1H), 2.81 (dd, *J* = 13.7, 11.2 Hz, 1H), 1.31 ppm (s, 9H).

<sup>13</sup>C NMR (101 MHz, DMSO)  $\delta$  170.98, 162.76, 155.38, 141.96, 138.12, 136.29, 133.93, 133.09, 129.33, 128.60, 128.09, 126.59, 126.31, 124.33, 123.27, 116.06, 78.09, 55.83, 52.40, 37.56, 28.19 ppm.

IR  $\nu$  (KBr disk, cm<sup>-1</sup>): 3373, 3269, 3063, 3030, 2978, 1718, 1692, 1606, 1496, 1454, 1437, 1393, 1367, 1323, 1248, 1166, 759, 697.

HRMS (ESI): *m/z* calcd for C<sub>27</sub>H<sub>30</sub>N<sub>4</sub>O<sub>5</sub>S+H<sup>+</sup>: 523.2010 [*M*+H]<sup>+</sup>; found: 523.2012.

### Boc-Phe- $\Delta$ Cys(S-5-methoxybenzoxazole)-OMe (7c)

Synthesis was performed using dehyropeptide (0.214 g, 0.5 mmol), 5-methoxybenzoxazole-2-thiol (0.098 g, 0.525 mmol), K<sub>2</sub>CO<sub>3</sub> (0.138 g, 1 mmol), ACN (8 ml). The product (0.199 g, 0.38 mol) was obtained as white solid with yield 76%.

Flash chromatography: increasing gradient of EtOAc in heksane (0→80%). TLC: 40% EtOAc in hexane, R<sub>f</sub> = 0.28.

<sup>1</sup>H NMR (400 MHz, DMSO)  $\delta$  10.03 (s, 1H), 7.94 (s, 1H), 7.63 (d, *J* = 9.0 Hz, 1H), 7.42 – 7.13 (m, 7H), 6.95 (dd, *J* = 9.0, 2.6 Hz, 1H), 4.45 – 4.35 (m, 1H), 3.80 (s, 6H), 3.05 (dd, *J* = 13.6, 3.8 Hz, 1H), 2.82 (dd, *J* = 13.6, 11.0 Hz, 1H), 1.32 ppm (s, 9H).

<sup>13</sup>C NMR (101 MHz, DMSO)  $\delta$  171.25, 162.46, 160.89, 157.24, 155.48, 146.03, 141.80, 137.94, 129.34, 128.10, 126.55, 126.36, 124.58, 112.87, 110.86, 102.53, 78.20, 55.95, 55.87, 52.88, 37.20, 28.17 ppm.

IR  $\nu$  (KBr disk, cm<sup>-1</sup>): 3384, 3362, 2971, 1718, 1700, 1612, 1508, 1482, 1466, 1438, 1324, 1244, 1157, 1023, 756, 701

HRMS (ESI): *m/z* calcd for C<sub>26</sub>H<sub>29</sub>N<sub>3</sub>O<sub>7</sub>S+H<sup>+</sup>: 528.1799 [*M*+H]<sup>+</sup>; found: 528.1803.

### Boc-Phe- $\Delta$ Cys(S-benzothiazole)-OMe (7d)

Synthesis was performed using dehyropeptide (0.214 g, 0.5 mmol), 2-mercaptobenzothiazole (0.090 g, 0.525 mmol), K<sub>2</sub>CO<sub>3</sub> (0.138 g, 1 mmol), ACN (8 ml). The product (0.234 g, 0.46 mol) was obtained as white solid with yield 92%.

Flash chromatography: increasing gradient of EtOAc in heksane (0→50%). TLC: 40% EtOAc in hexane, R<sub>f</sub> = 0.36.

<sup>1</sup>H NMR (400 MHz, DMSO)  $\delta$  9.97 (s, 1H), 8.10 (d, *J* = 7.9 Hz, 1H), 8.07 (s, 1H), 8.00 (d, *J* = 8.0 Hz, 1H), 7.57 – 7.50 (m, 1H), 7.48 – 7.42 (m, 1H), 7.41 – 7.18 (m, 5H), 7.15 (d, *J* = 8.6 Hz, 1H), 4.44 – 4.34 (m, 1H), 3.79 (s, 3H), 3.06 (dd, *J* = 13.6, 3.8 Hz, 1H), 2.83 (dd, *J* = 13.6, 11.0 Hz, 1H), 1.32 ppm (s, 9H).

<sup>13</sup>C NMR (101 MHz, DMSO)  $\delta$  171.09, 162.64, 162.44, 155.44, 152.36, 137.97, 134.95, 129.36, 128.09, 126.87, 126.54, 126.34, 125.85, 125.30, 122.30, 121.90, 78.18, 55.90, 52.79, 37.28, 28.18 ppm;

IR  $\nu$  (KBr disk, cm<sup>-1</sup>): 3373, 3064, 2977, 2929, 1720, 1690, 1606, 1498, 1456, 1428, 1367, 1323, 1247, 1167, 994, 756, 701

HRMS (ESI): *m/z* calcd for C<sub>25</sub>H<sub>27</sub>N<sub>3</sub>O<sub>5</sub>S<sub>2</sub>+H<sup>+</sup>: 514.1465 [*M*+H]<sup>+</sup>; found: 514.1475.

### Boc-Phe- $\Delta$ Cys(S-adenine)-OMe (7e)

Synthesis was performed using dehyropeptide (0.214 g, 0.5 mmol), 8-mercaptoadenine (0.092 g, 0.525 mmol),  $K_2CO_3$  (0.138 g, 1 mmol), ACN (10 ml) and DMF extra dry (1 ml). In order to remove DMF the residue remained after solvent evaporation was dissolved in EtOAc and washed with brine and dried with anhydrous  $MgSO_4$ . Then chromatographic purification was performed. The product (0.132 g, 0.26 mol) was obtained as white solid with yield 52%.

Flash chromatography: increasing gradient of MeOH in DCM (0 $\rightarrow$ 15%). TLC: 10% MeOH in DCM,  $R_f$  = 0.37.

$^1H$  NMR (400 MHz, DMSO)  $\delta$  13.53 (s, 1H), 9.79 (s, 1H), 8.15 (s, 1H), 8.12 (s, 1H), 7.47 – 7.15 (m, 7H), 7.09 (d,  $J$  = 8.7 Hz, 1H), 4.43 – 4.33 (m, 1H), 3.74 (s, 3H), 3.07 (dd,  $J$  = 13.6, 3.4 Hz, 1H), 2.81 (dd,  $J$  = 13.6, 11.2 Hz, 1H), 1.30 ppm (s, 9H).

$^{13}C$  NMR (101 MHz, DMSO)  $\delta$  171.10, 162.79, 155.40, 154.29 broad, 151.87 broad, 150.42 broad, 145.59 broad, 138.09, 130.42 broad, 129.34, 128.11, 126.34, 124.26, 120.03 broad, 78.13, 55.85, 52.47, 37.50, 28.20 ppm.

IR  $\nu$  (KBr disk,  $cm^{-1}$ ): 3333, 3191, 3067, 2978, 1716, 1662, 1604, 1497, 1455, 1438, 1367, 1320, 1249, 1168, 700.

HRMS (ESI):  $m/z$  calcd for  $C_{23}H_{27}N_7O_5S+H^+$ : 514.1867 [ $M+H$ ] $^+$ ; found: 514.1869.

### Boc-Gly- $\Delta$ Cys(S,S-bismethylbipyridine)-OMe (8)

Synthesis was performed using dehyropeptide (0.337 g, 1 mmol), 5,5'-bis(mercaptomethyl)-2,2'-bipyridine (0.129 g, 0.5 mmol),  $K_2CO_3$  (0.276 g, 2 mmol), ACN (10 ml). The product (0.301 g, 0.40 mol) was obtained as white solid with yield 80%.

Flash chromatography: increasing gradient of MeOH in CHL (0 $\rightarrow$ 10%). TLC: 10% MeOH in CHL,  $R_f$  = 0.37.

$^1H$  NMR (400 MHz, DMSO)  $\delta$  9.15 (s, 1H), 8.69 (d,  $J$  = 1.8 Hz, 1H), 8.35 (d,  $J$  = 8.2 Hz, 1H), 7.93 (dd,  $J$  = 8.2, 1.8 Hz, 1H), 7.59 (s, 1H), 6.97 (t,  $J$  = 6.1 Hz, 1H), 4.29 (s, 2H), 3.63 (s and d overlapped, 5H), 1.36 ppm (s, 9H).

$^{13}C$  NMR (101 MHz, DMSO)  $\delta$  168.12, 162.80, 155.75, 153.99, 149.43, 137.95, 137.61, 134.84, 122.26, 120.43, 78.03, 52.00, 42.79, 33.55, 28.21 ppm.

IR  $\nu$  (KBr disk,  $cm^{-1}$ ): 3390, 3300, 3004, 2978, 2953, 1713, 1665, 1596, 1520, 1468, 1437, 1367, 1332, 1246, 1168, 847, 750

HRMS (ESI):  $m/z$  calcd for  $C_{34}H_{44}N_6O_{10}S_2+H^+$ : 761.2633 [ $M+H$ ] $^+$ ; found: 761.2635.

### HCl-Gly- $\Delta$ Cys(S-triazole)-OMe (9a)

The peptide (0.098 g, 0.27 mmol) was treated with HCl in methanol (1.5 M, 3 ml). The product (0.082 g) was obtained quantitatively.

$^1H$  NMR (400 MHz, DMSO)  $\delta$  10.23 (s, 1H), 8.69 (s, 1H), 8.30 (s, 3H), 8.08 (s, 1H), 3.81 – 3.75 (m, 2H), 3.73 ppm (s, 3H).

$^{13}C$  NMR (101 MHz, DMSO)  $\delta$  165.10, 162.37, 154.83, 145.95, 132.68, 122.87, 52.60, 40.27.

IR  $\nu$  (KBr disk,  $cm^{-1}$ ): 3409, 3182, 3121, 3017, 2952, 1714, 1690, 1611, 1560, 1510, 1477, 1432, 1329, 1270, 1251, 1095, 969, 849, 751.

HRMS (ESI):  $m/z$  calcd for  $C_8H_{11}N_5O_3S+H^+$ : 258.0655 [ $M+H$ ] $^+$ ; found: 258.0668.

#### HCl-Gly- $\Delta$ Cys(S-benzothiazole)-OMe (9d)

The peptide (0.085 g, 0.20 mmol) was treated with HCl in methanol (1.5 M, 3 ml). The product (0.070 g) was obtained quantitatively.

$^1\text{H NMR}$  (400 MHz, DMSO)  $\delta$  10.50 (s, 1H), 8.30 (s, 3H), 8.12 (s and d overlapped, 2H), 8.00 (d,  $J = 7.9$  Hz, 1H), 7.61 – 7.51 (m, 1H), 7.49 – 7.42 (m, 1H), 3.84 – 3.78 ppm (m and s overlapped, 5H).  
 $^{13}\text{C NMR}$  (101 MHz, DMSO)  $\delta$  165.31, 162.26, 161.82, 152.32, 135.02, 127.78, 126.95, 125.44, 125.11, 122.37, 121.99, 52.92, 40.37.

$\text{IR v}$  (KBr disk,  $\text{cm}^{-1}$ ): 3430, 3065, 2994, 2952, 1704, 1608, 1529, 1462, 1426, 1327, 1311, 1240, 996, 757

$\text{HRMS}$  (ESI):  $m/z$  calcd for  $\text{C}_{13}\text{H}_{13}\text{N}_3\text{O}_3\text{S}_2+\text{H}^+$ : 324.0471 [ $M+\text{H}$ ] $^+$ ; found: 324.0473.

#### HCl-Phe- $\Delta$ Cys(S-triazole)-OMe (10a)

The peptide (0.135 g, 0.30 mmol) was treated with HCl in methanol (1.5 M, 3 ml). The product (0.120 g) was obtained quantitatively.

$^1\text{H NMR}$  (400 MHz, DMSO)  $\delta$  10.50 (s, 1H), 8.70 (s, 1H), 8.41 (d,  $J = 3.9$  Hz, 3H), 8.08 (s, 1H), 7.44 – 7.25 (m, 5H), 4.36 – 4.27 (m, 1H), 3.73 (s, 3H), 3.28 (dd,  $J = 14.1, 5.3$  Hz, 1H), 3.08 ppm (dd,  $J = 14.1, 8.0$  Hz, 1H).

$^{13}\text{C NMR}$  (101 MHz, DMSO)  $\delta$  167.25, 162.37, 154.90, 145.92, 134.80, 132.67, 129.86, 128.61, 127.30, 122.83, 53.48, 52.57, 37.03.

$\text{IR v}$  (KBr disk,  $\text{cm}^{-1}$ ): 3427, 2953, 2894, 1721, 1695, 1614, 1520, 1498, 1456, 1437, 1329, 1254, 974, 837, 752, 702

$\text{HRMS}$  (ESI):  $m/z$  calcd for  $\text{C}_{15}\text{H}_{17}\text{N}_5\text{O}_3\text{S}+\text{H}^+$ : 348.1125 [ $M+\text{H}$ ] $^+$ ; found: 348.1128.

#### HCl-Phe- $\Delta$ Cys(S-benzothiazole)-OMe (10d)

The peptide (0.120 g, 0.23 mmol) was treated with HCl in methanol (1.5 M, 3 ml). The product (0.100 g) was obtained quantitatively. The signals derived from two conformers are visible in NMR spectra (please see attached spectra).

$^1\text{H NMR}$  (400 MHz, DMSO)  $\delta$  10.70 (s, 1H), 8.43 (s, 3H), 8.14 (s, 1H), 8.12 (d,  $J = 7.5$  Hz, 1H), 8.01 (d,  $J = 8.0$  Hz, 1H), 7.58 – 7.52 (m, 1H), 7.46 (m, 1H), 7.42 – 7.10 (m, 5H), 4.36 (s, 1H), 3.79 (s, 3H), 3.26 (dd,  $J = 14.1, 5.5$  Hz, 1H), 3.10 (dd,  $J = 14.1, 8.0$  Hz, 1H).

$^{13}\text{C NMR}$  (101 MHz, DMSO)  $\delta$  167.38, 162.23, 161.83, 152.30, 135.01, 134.67, 129.83, 128.61, 128.07, 127.32, 126.95, 125.44, 124.96, 122.37, 121.97, 53.46, 52.89, 37.02.

$\text{IR v}$  (KBr disk,  $\text{cm}^{-1}$ ): 3430, 3063, 2951, 1720, 1701, 1605, 1498, 1456, 1427, 1327, 1239, 995, 755, 727, 701

$\text{HRMS}$  (ESI):  $m/z$  calcd for  $\text{C}_{20}\text{H}_{19}\text{N}_3\text{O}_3\text{S}_2+\text{H}^+$ : 414.0940 [ $M+\text{H}$ ] $^+$ ; found: 414.0932.



4. <sup>1</sup>H NMR, <sup>13</sup>C NMR and IR spectra

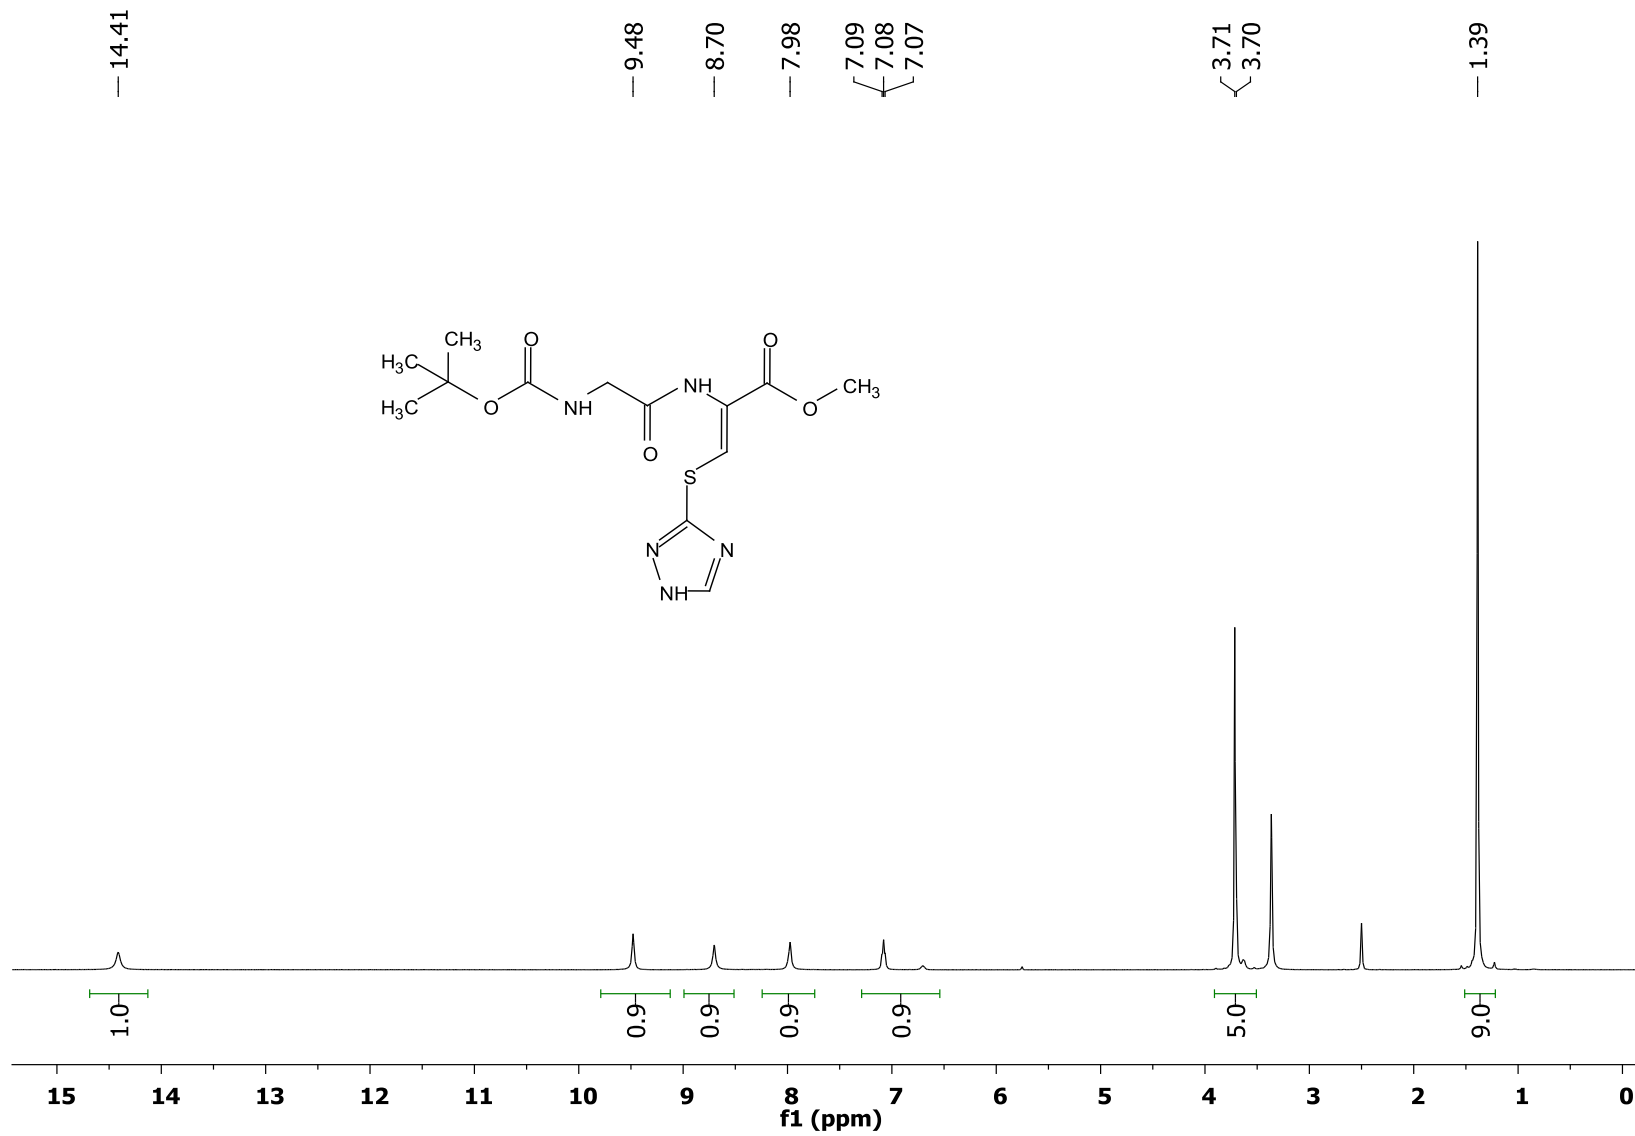

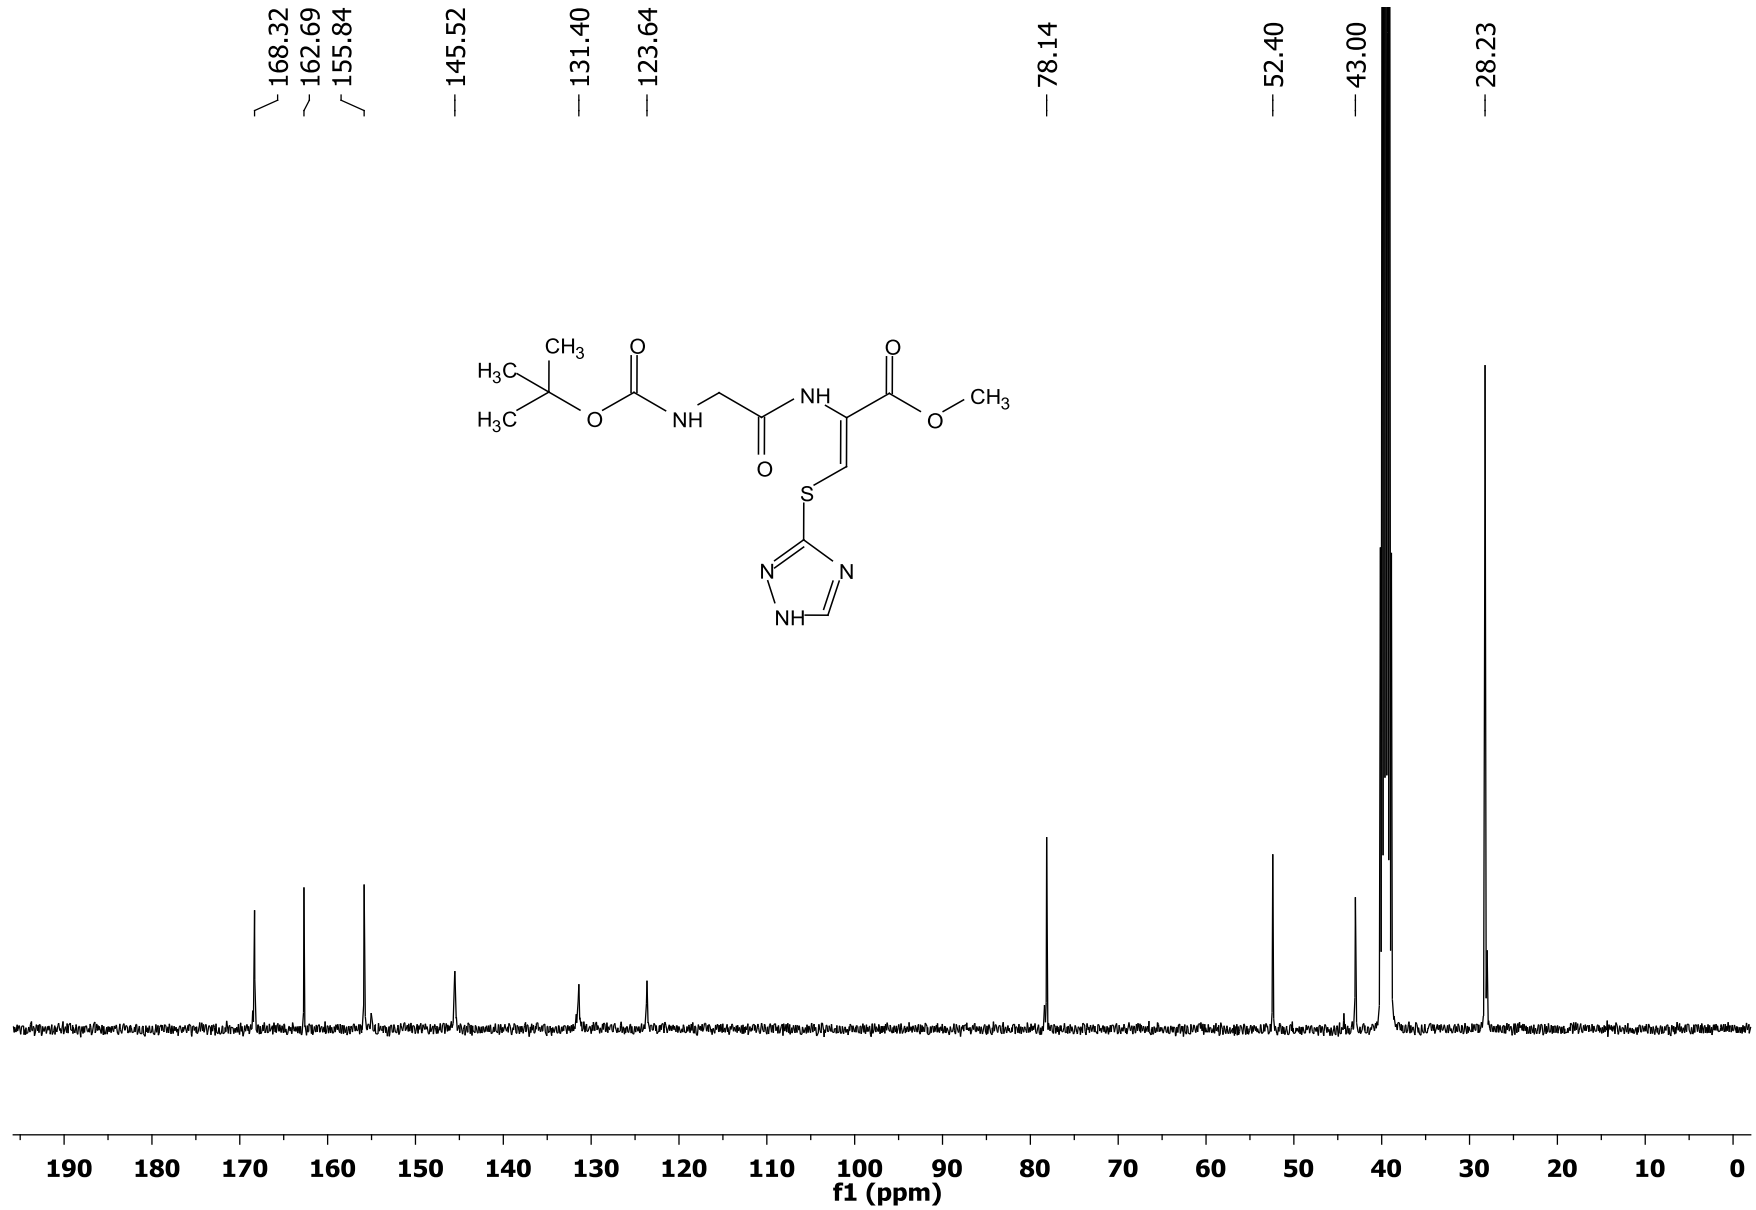

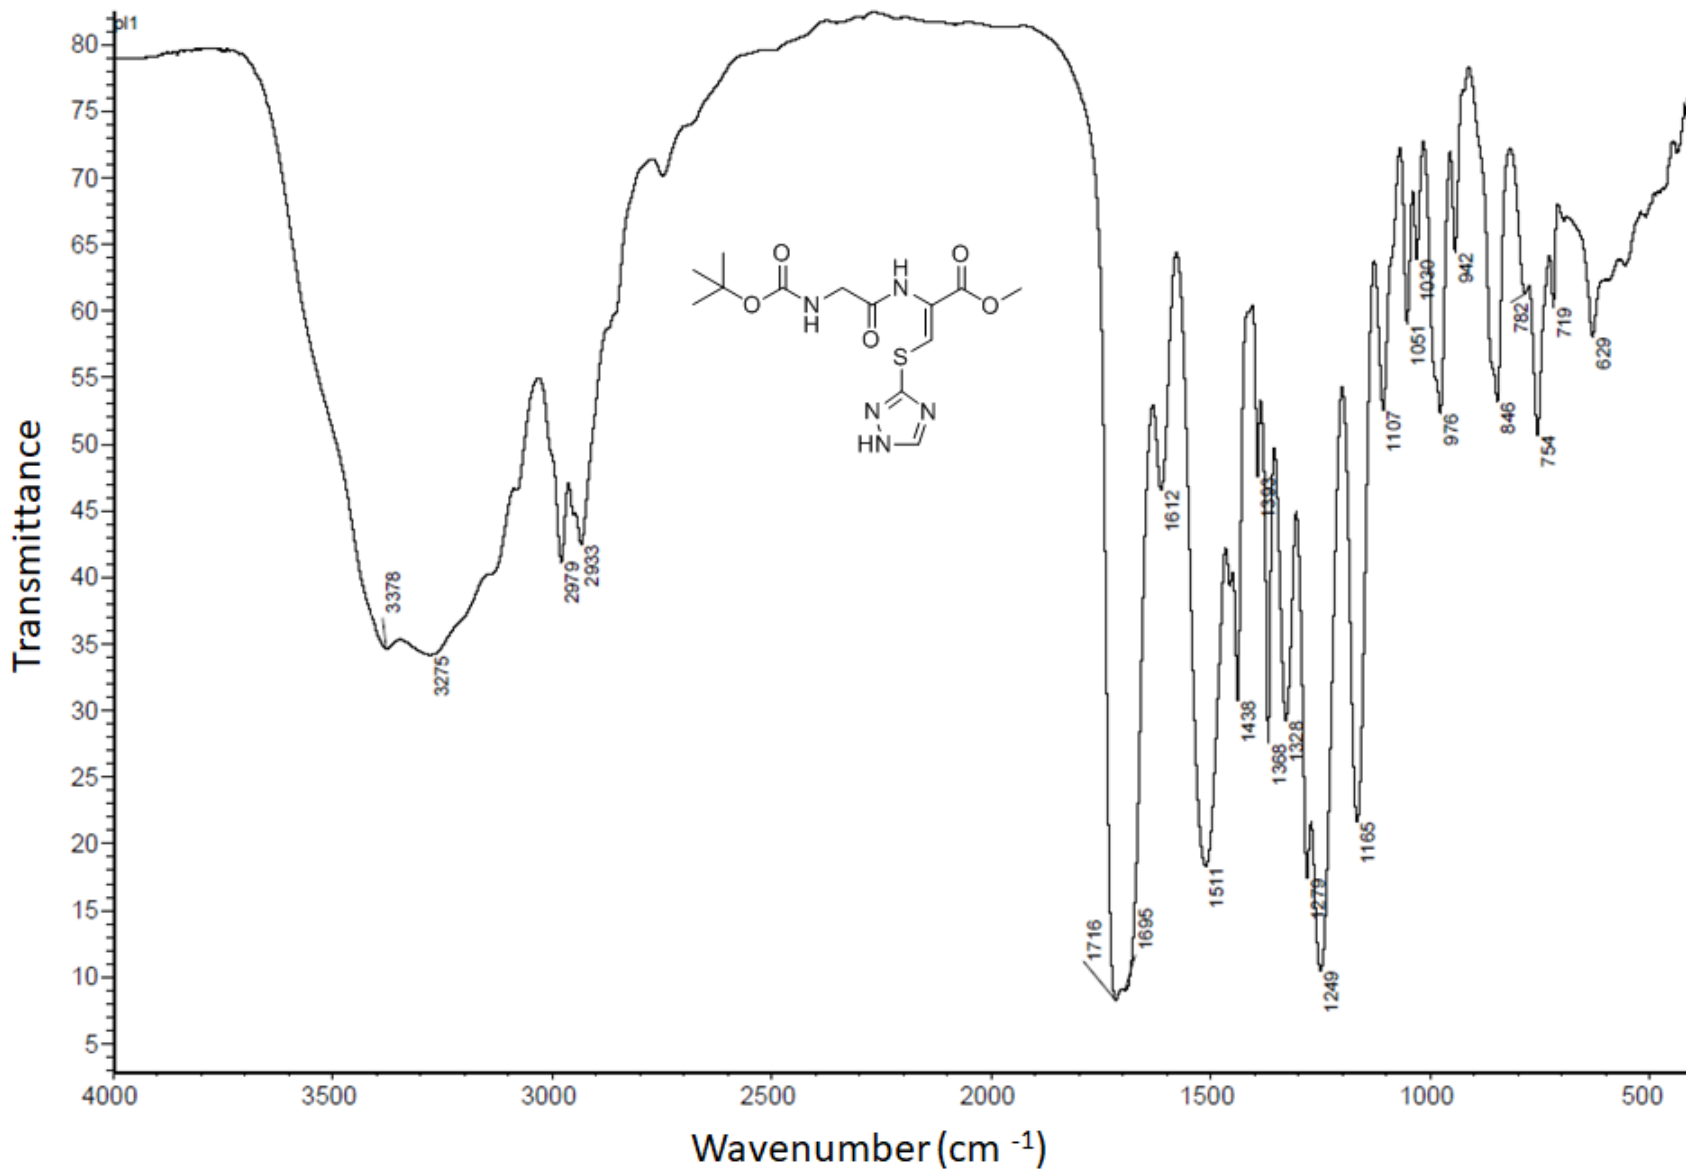

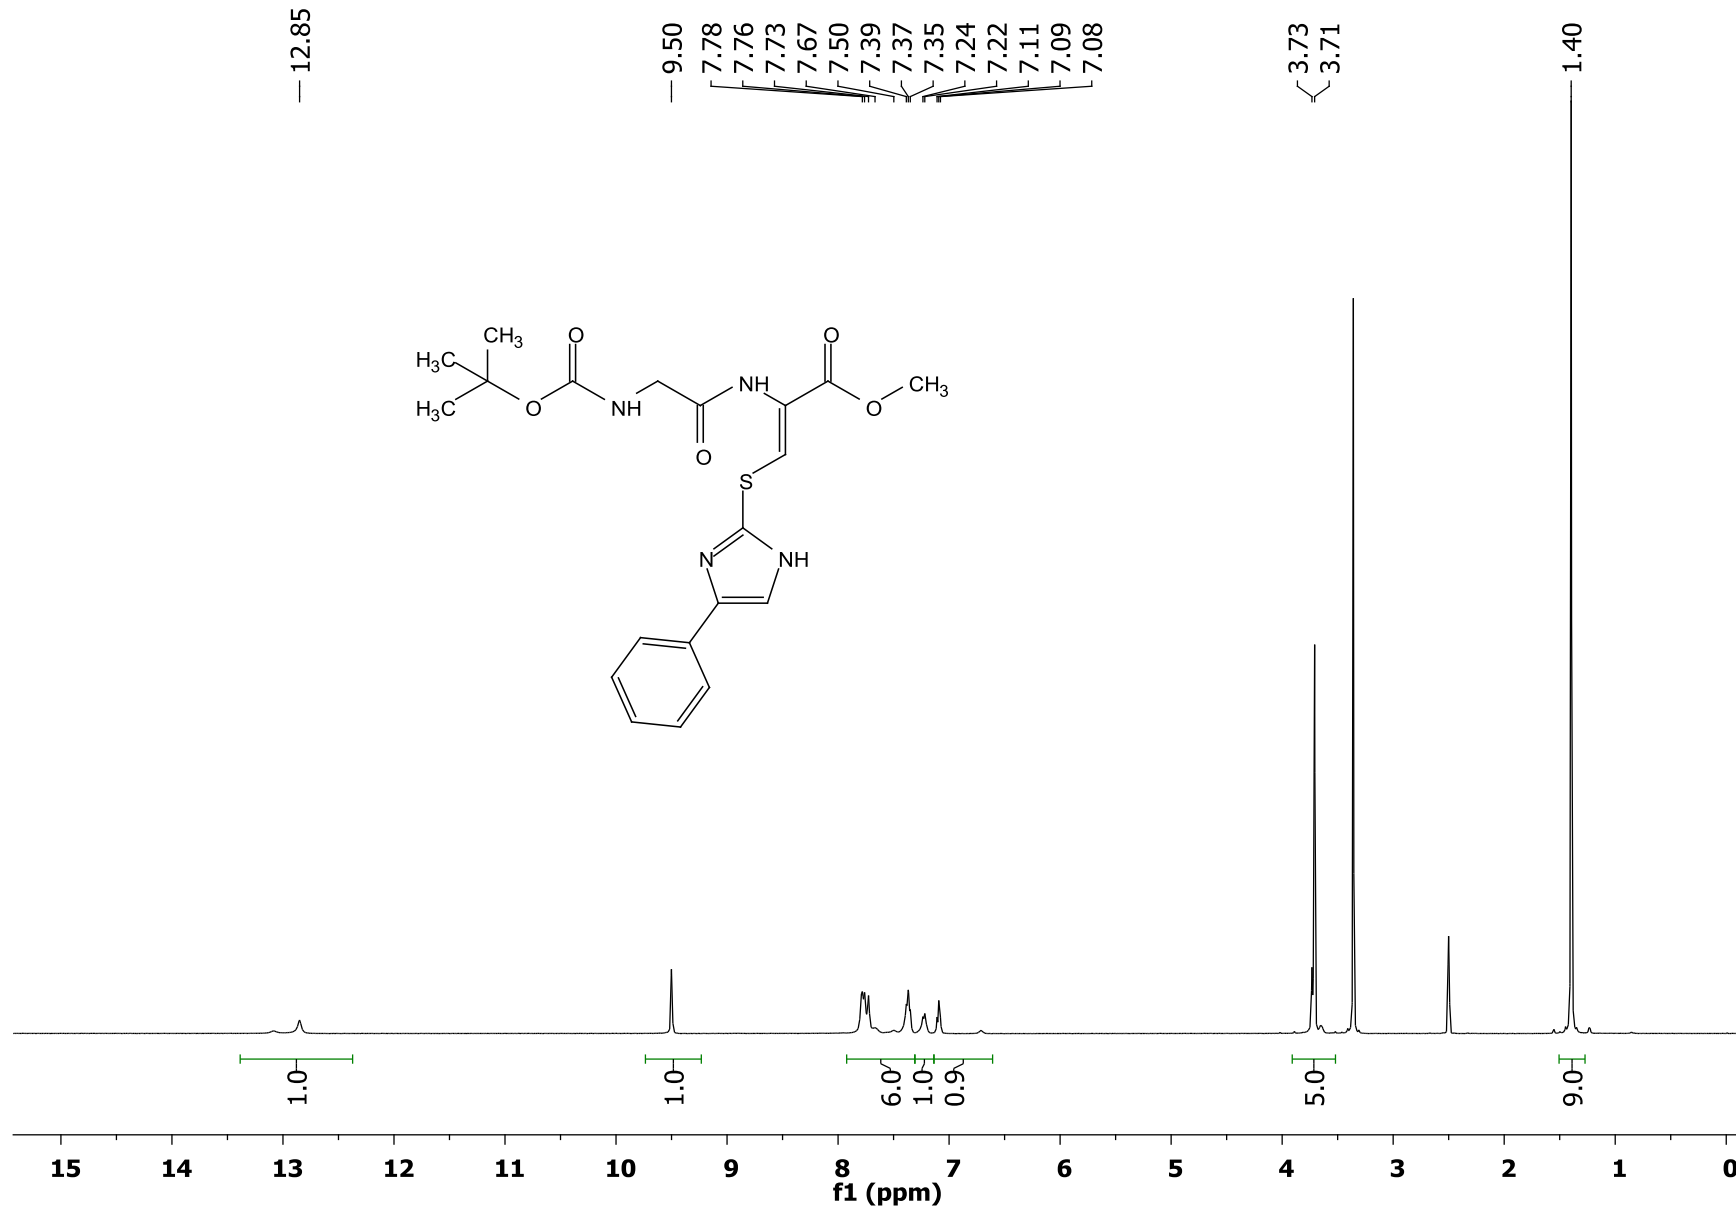

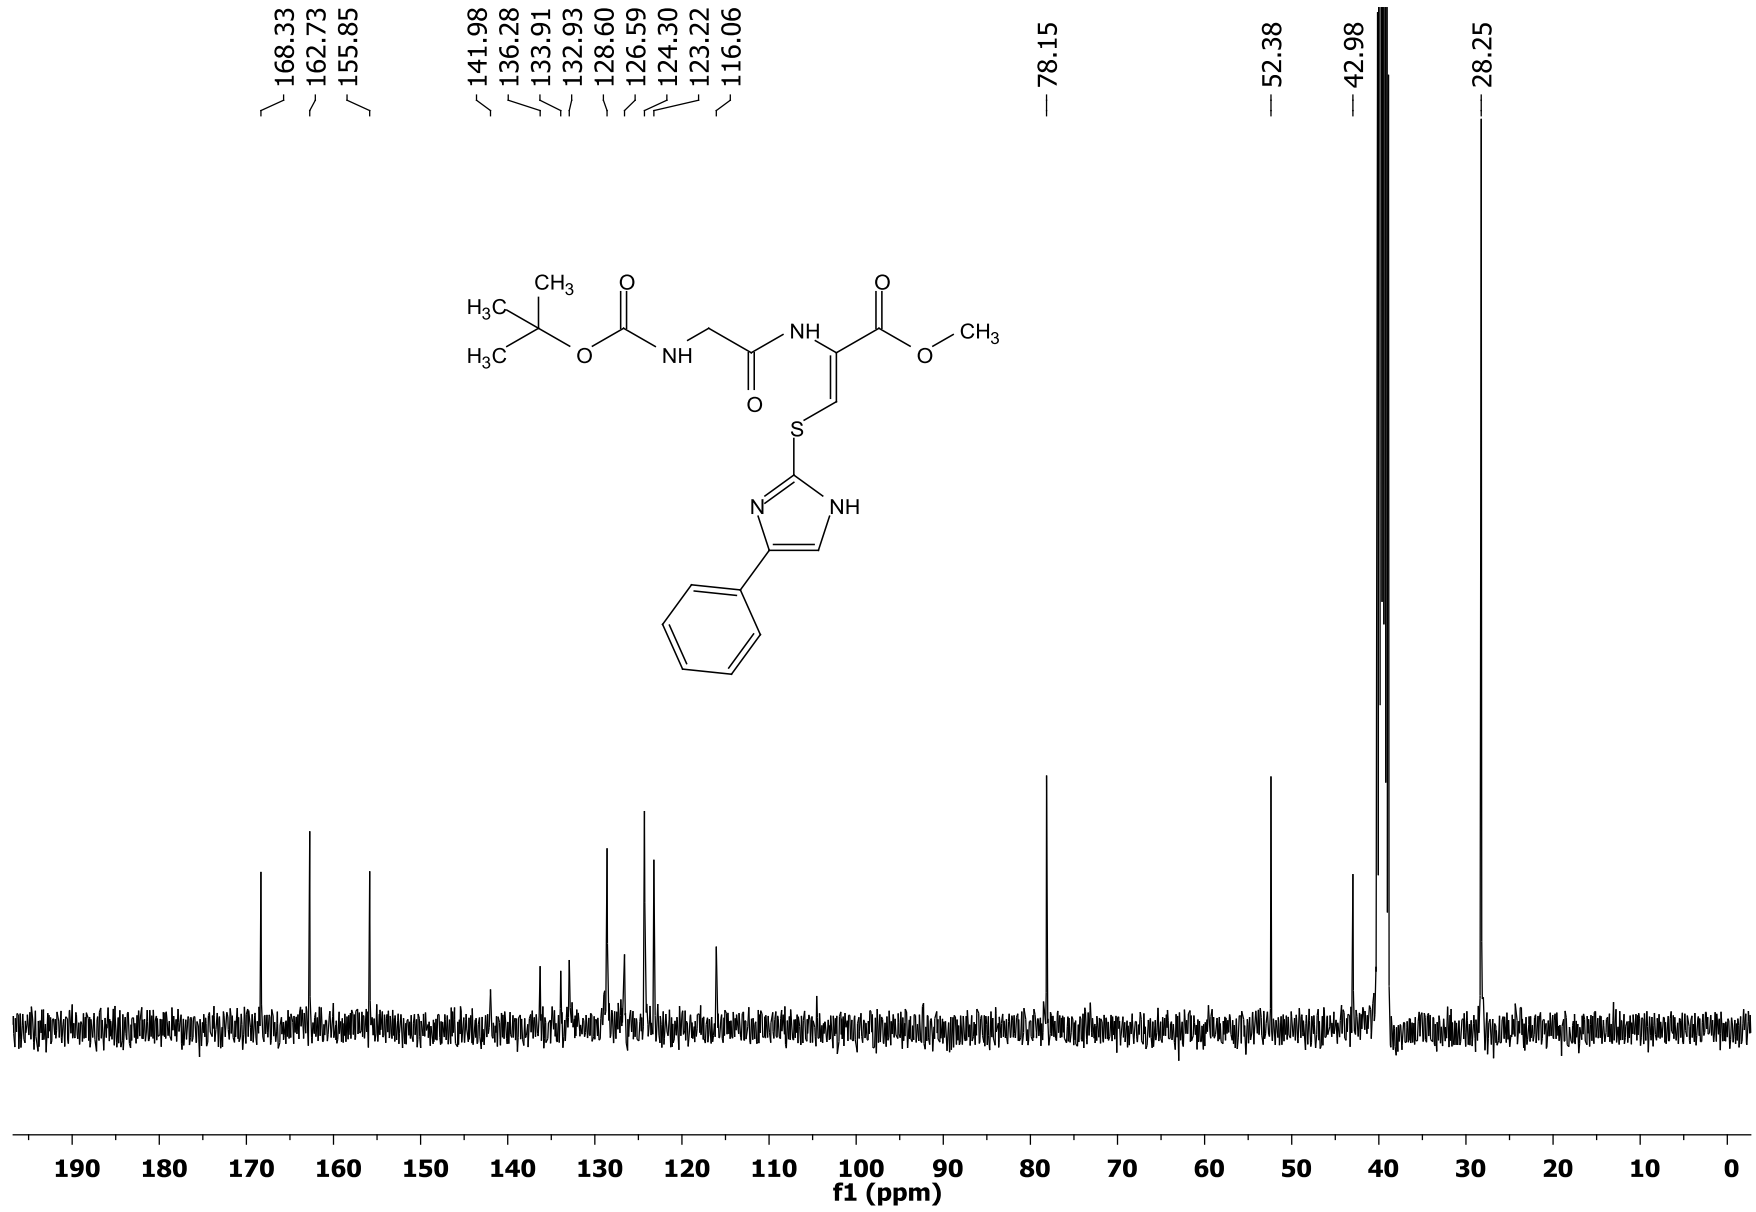

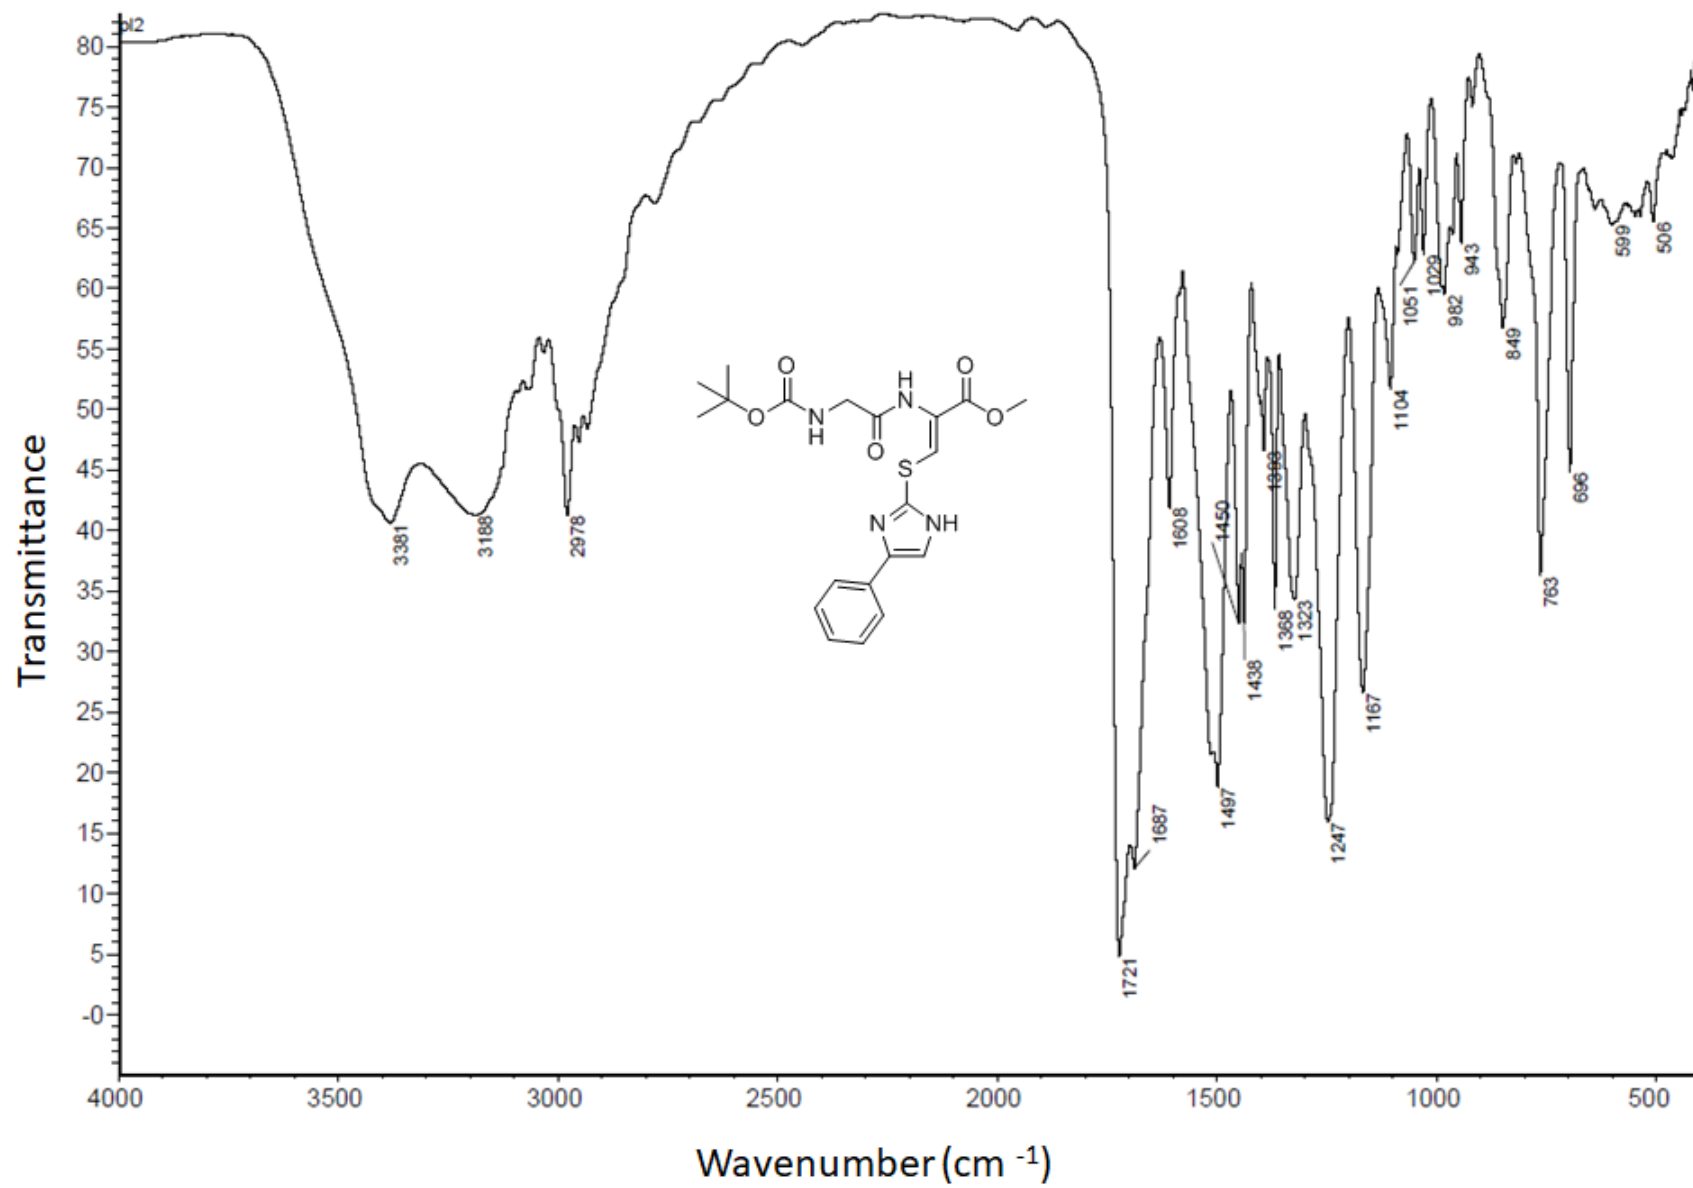

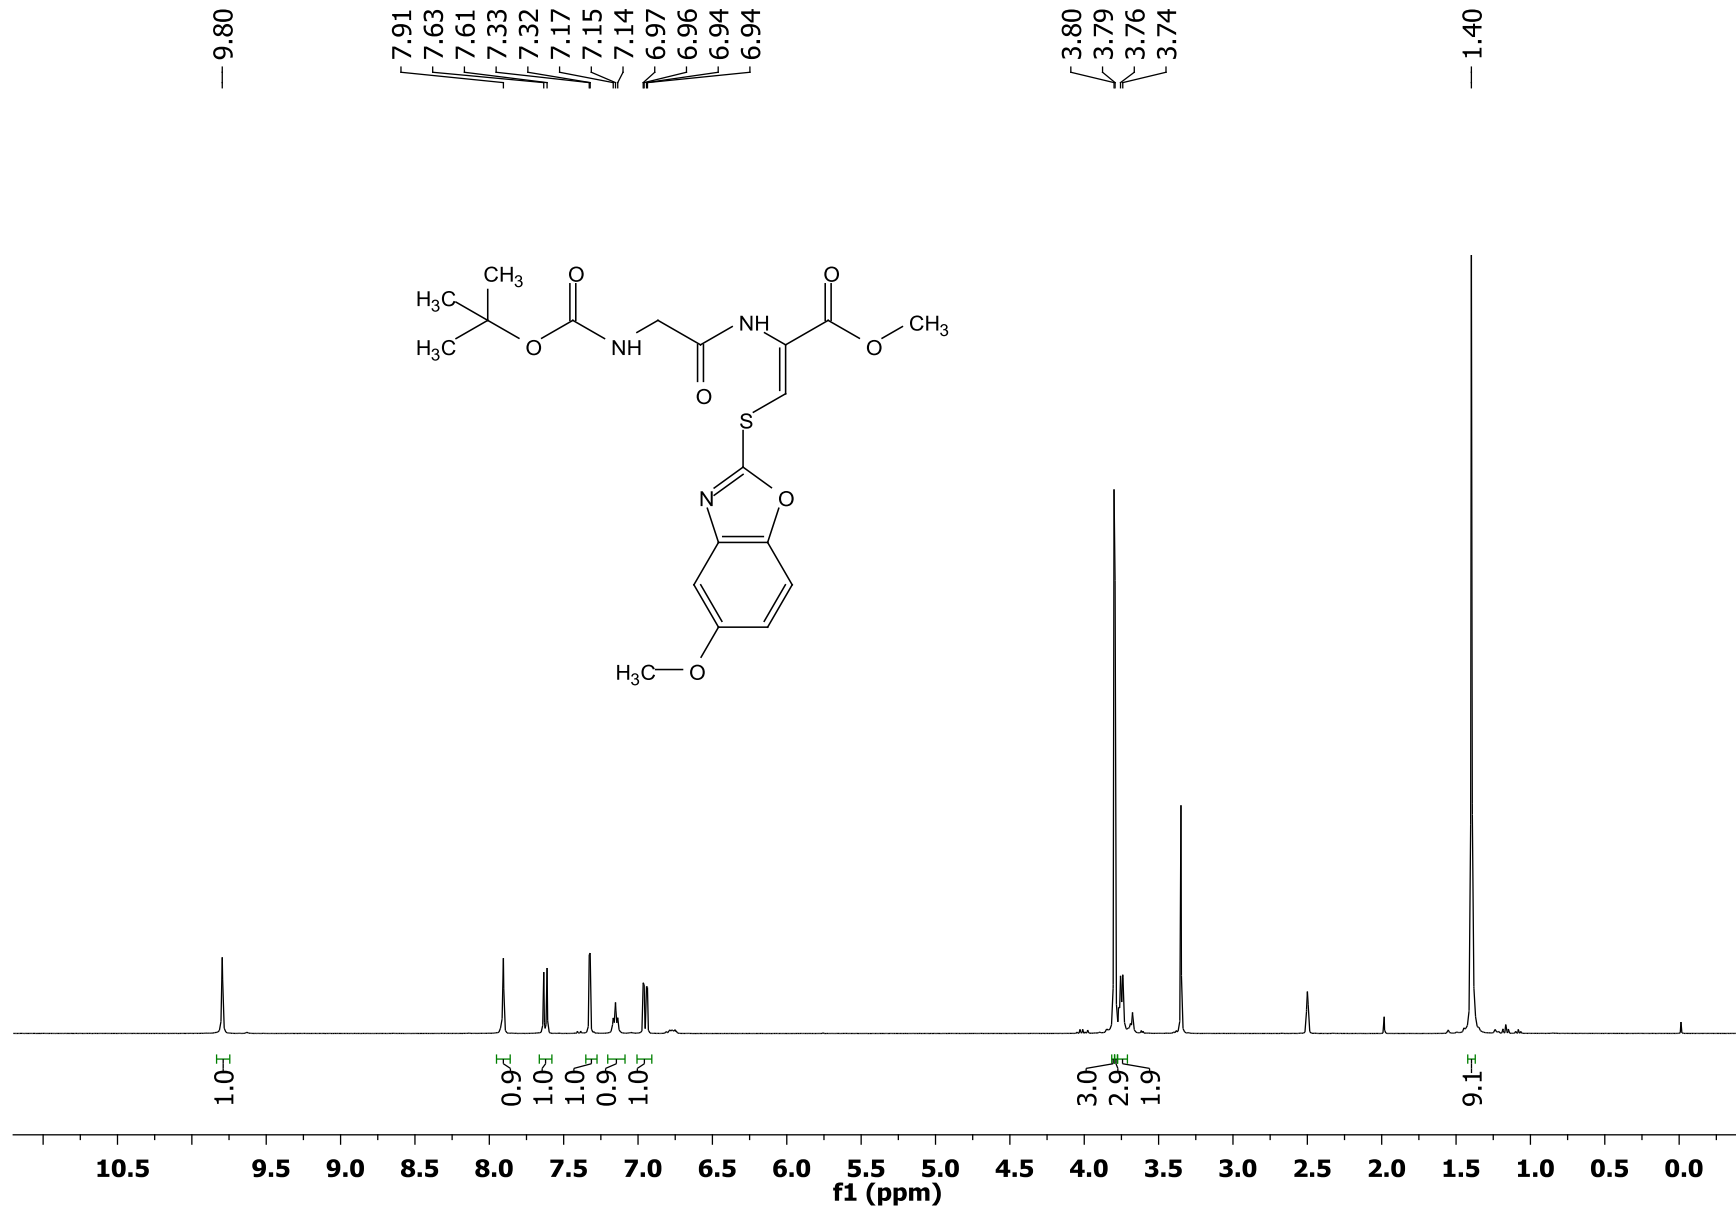

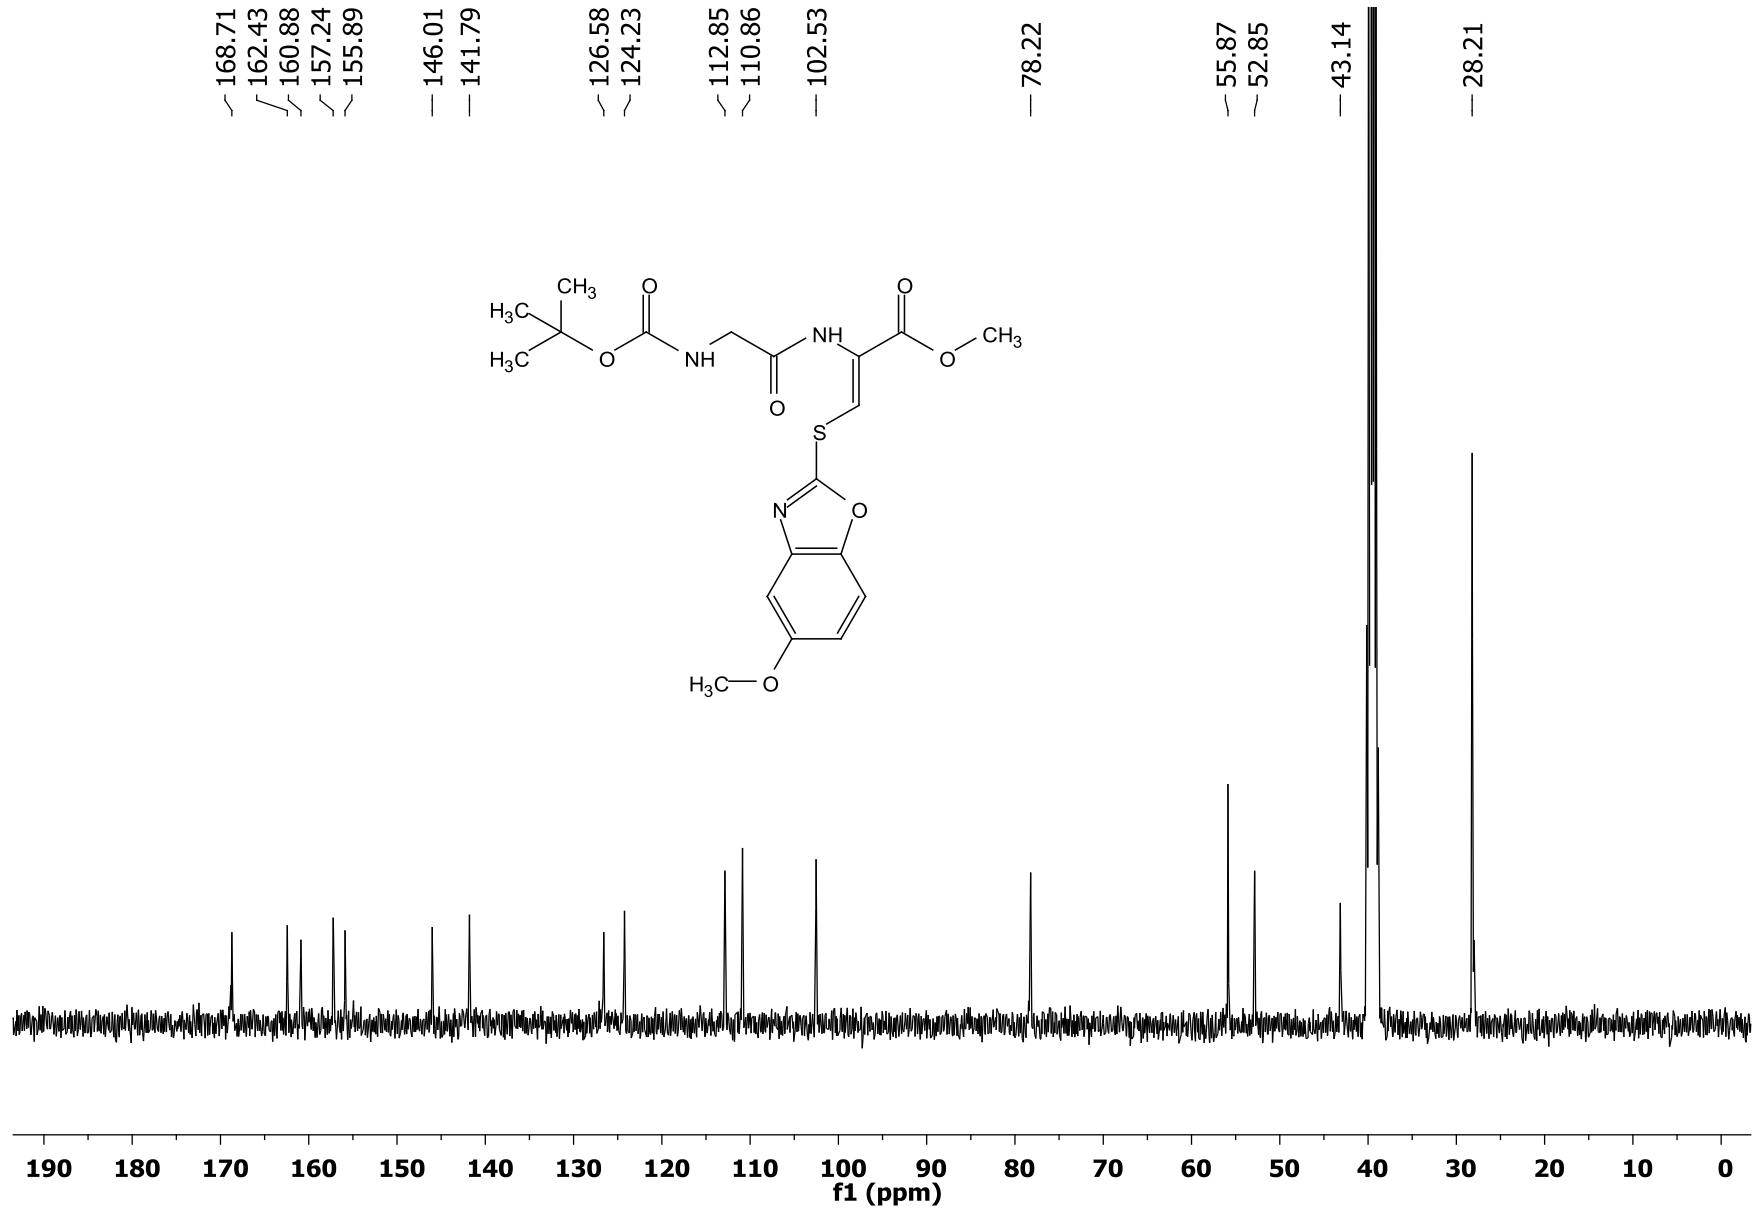



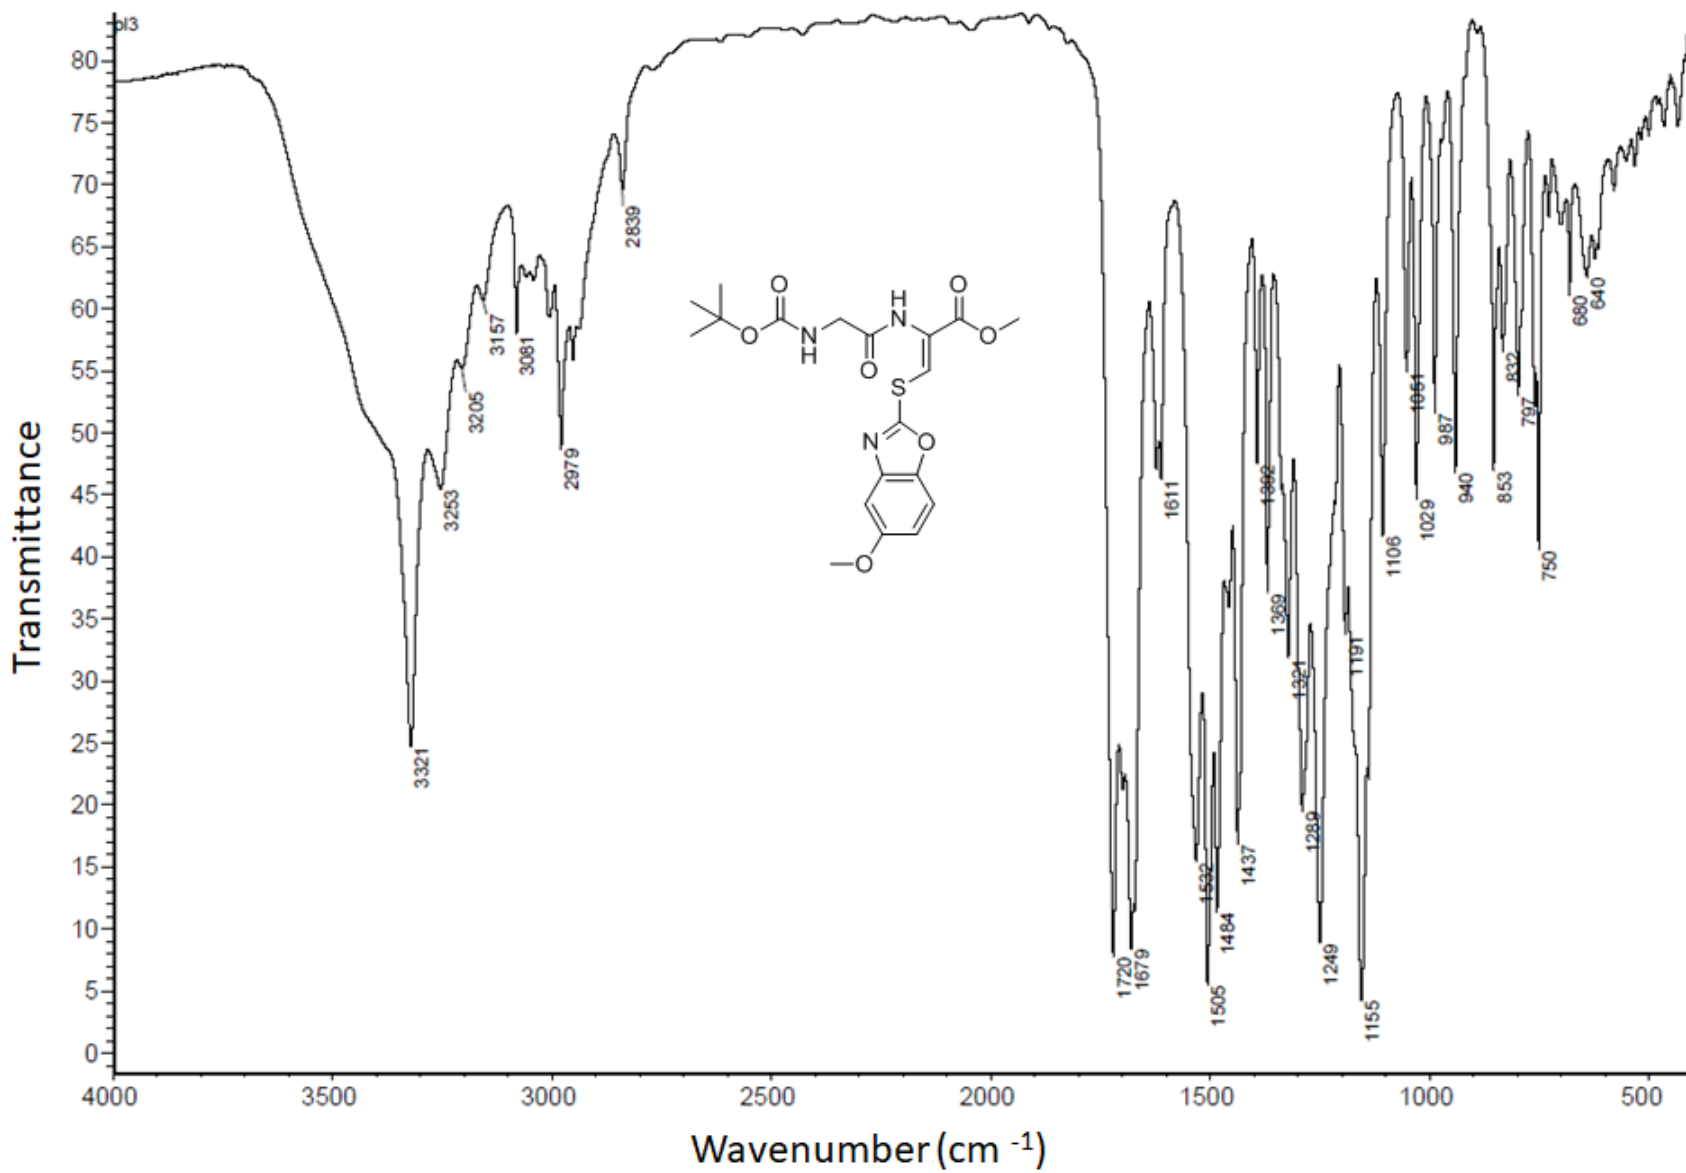

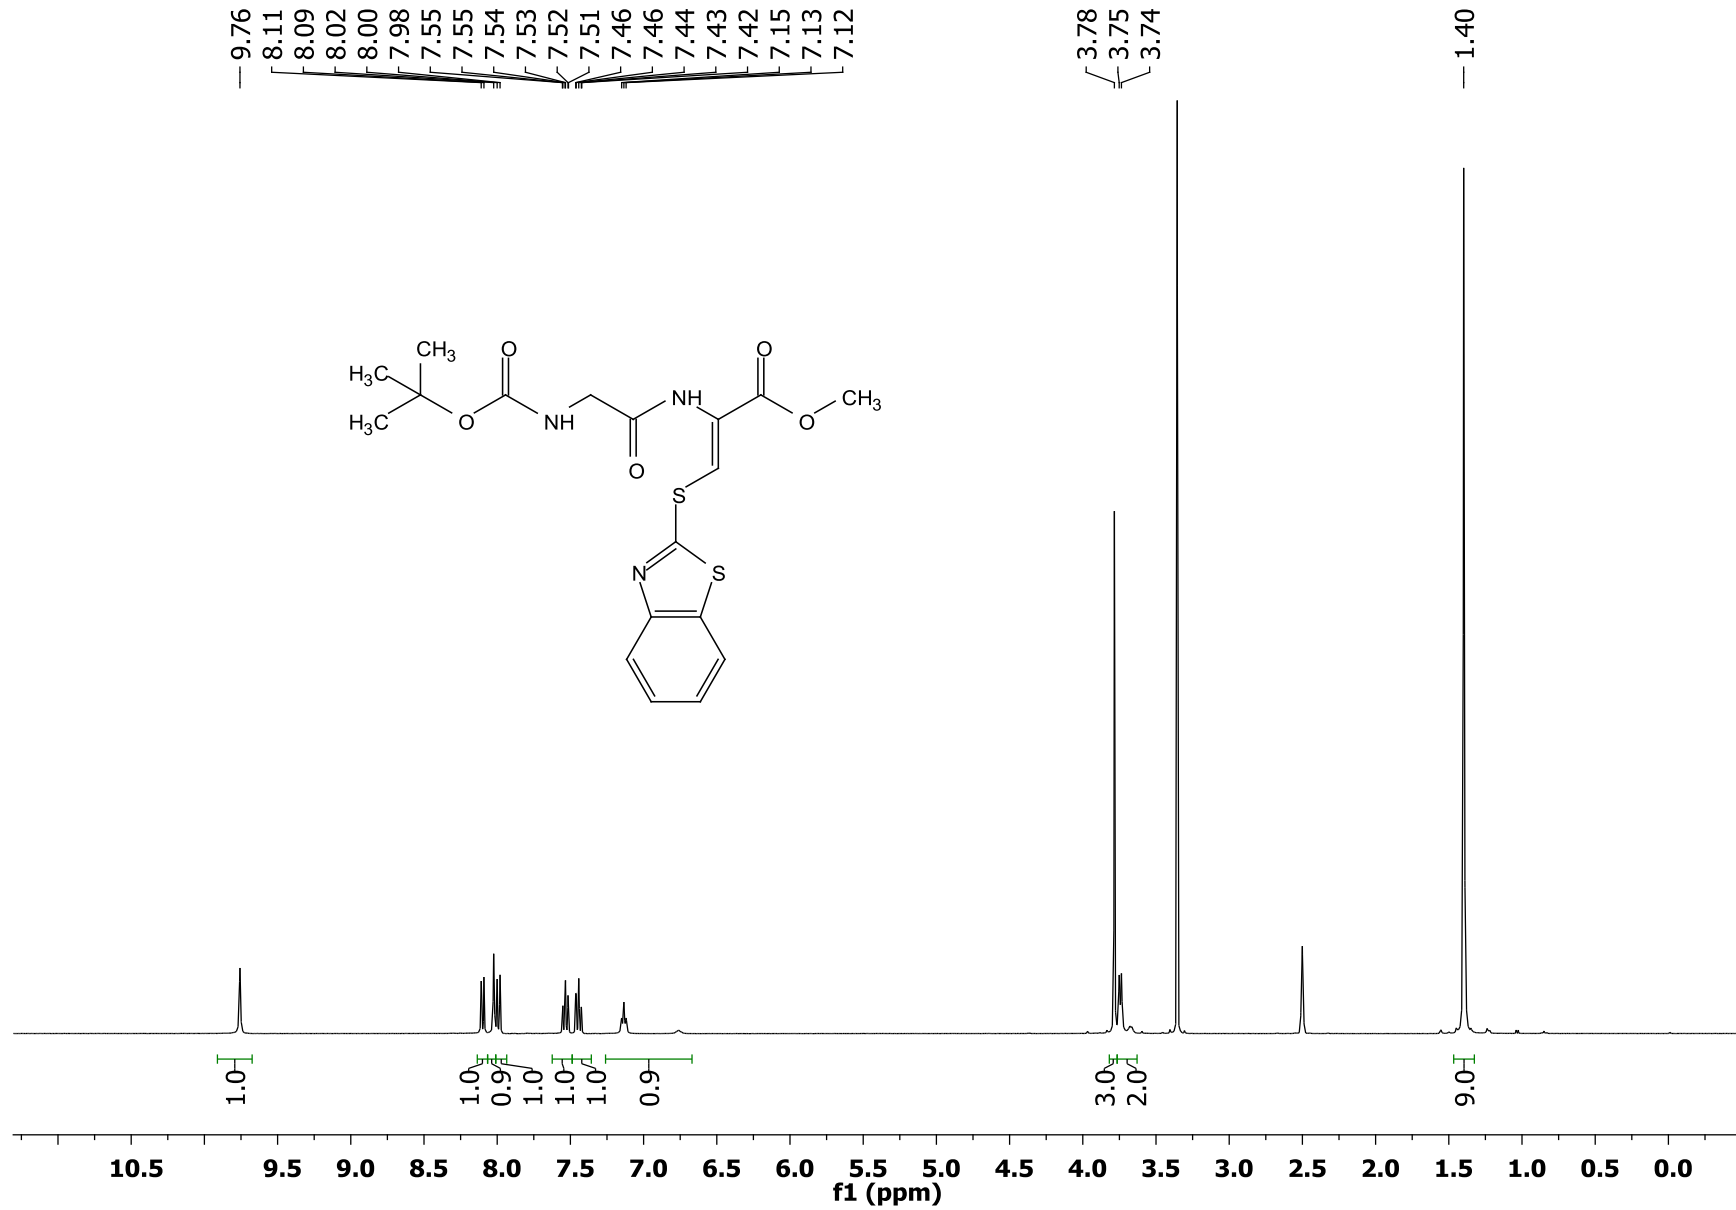

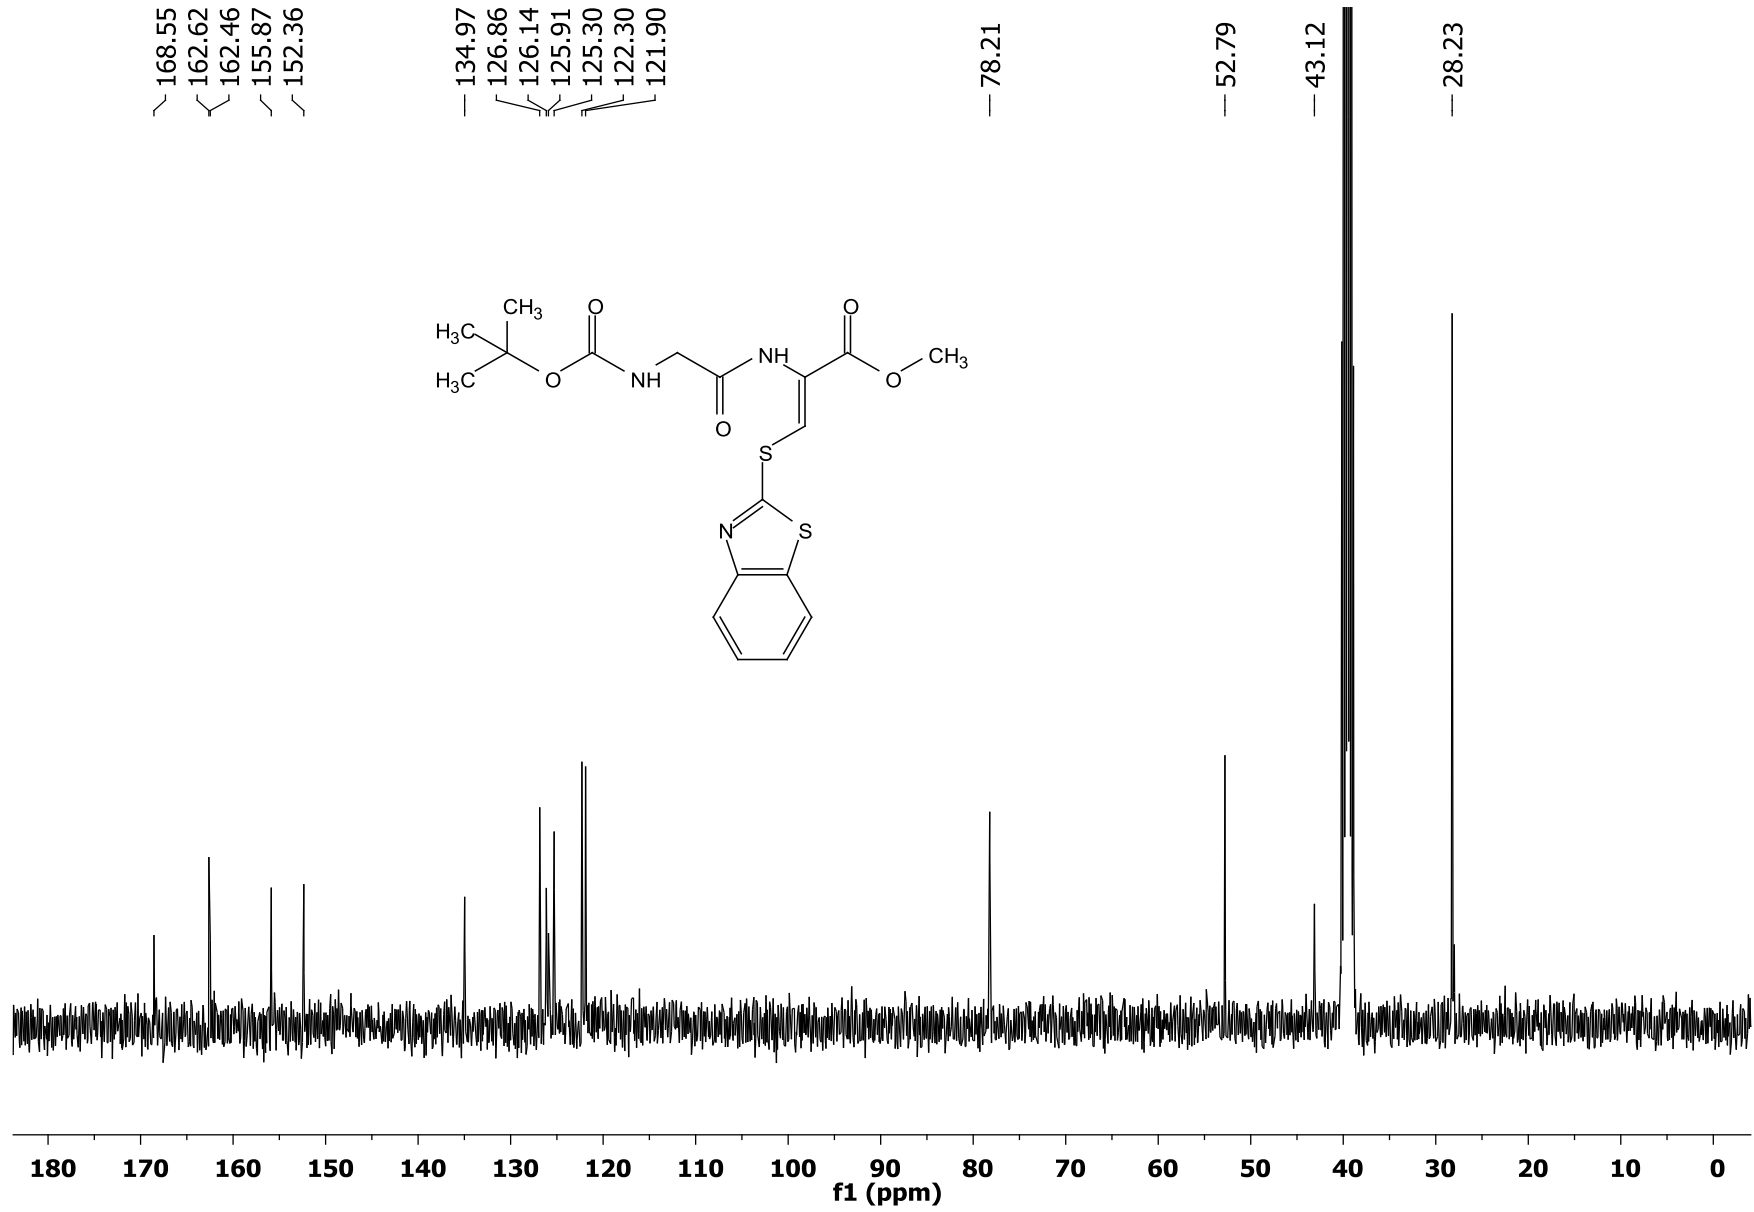

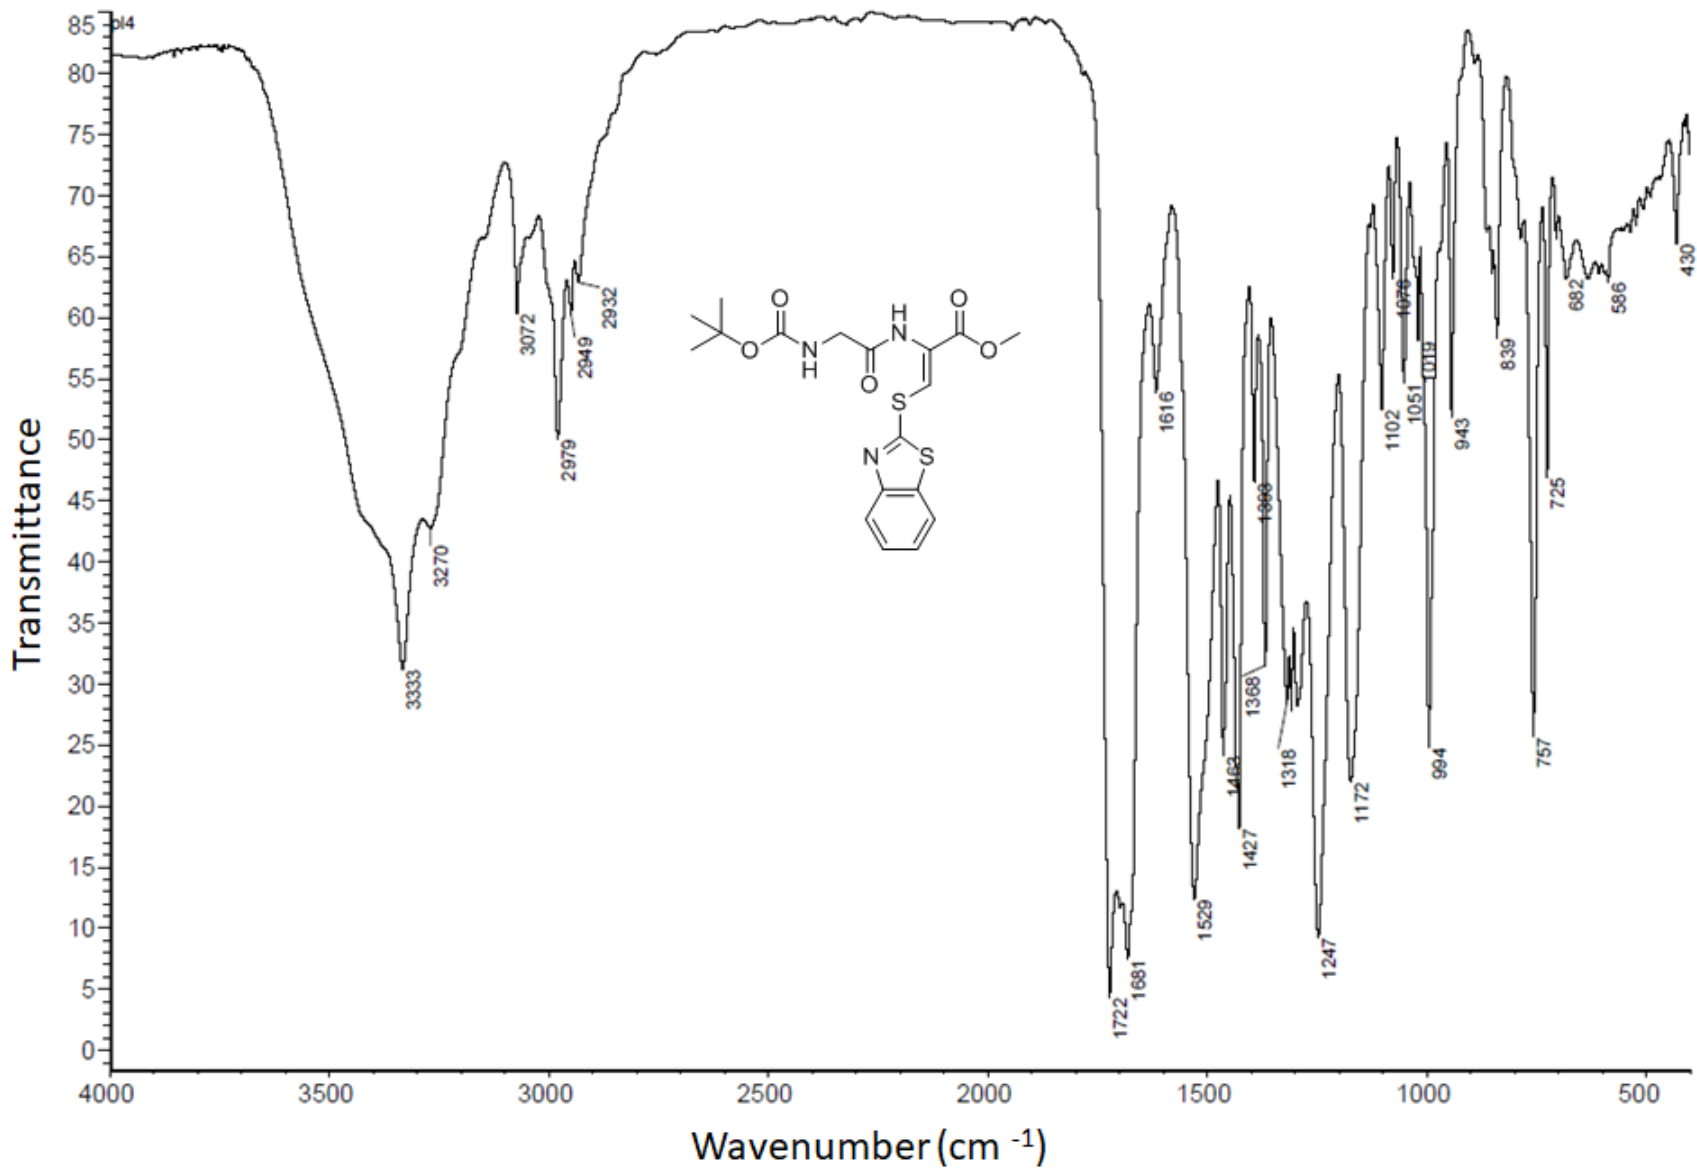

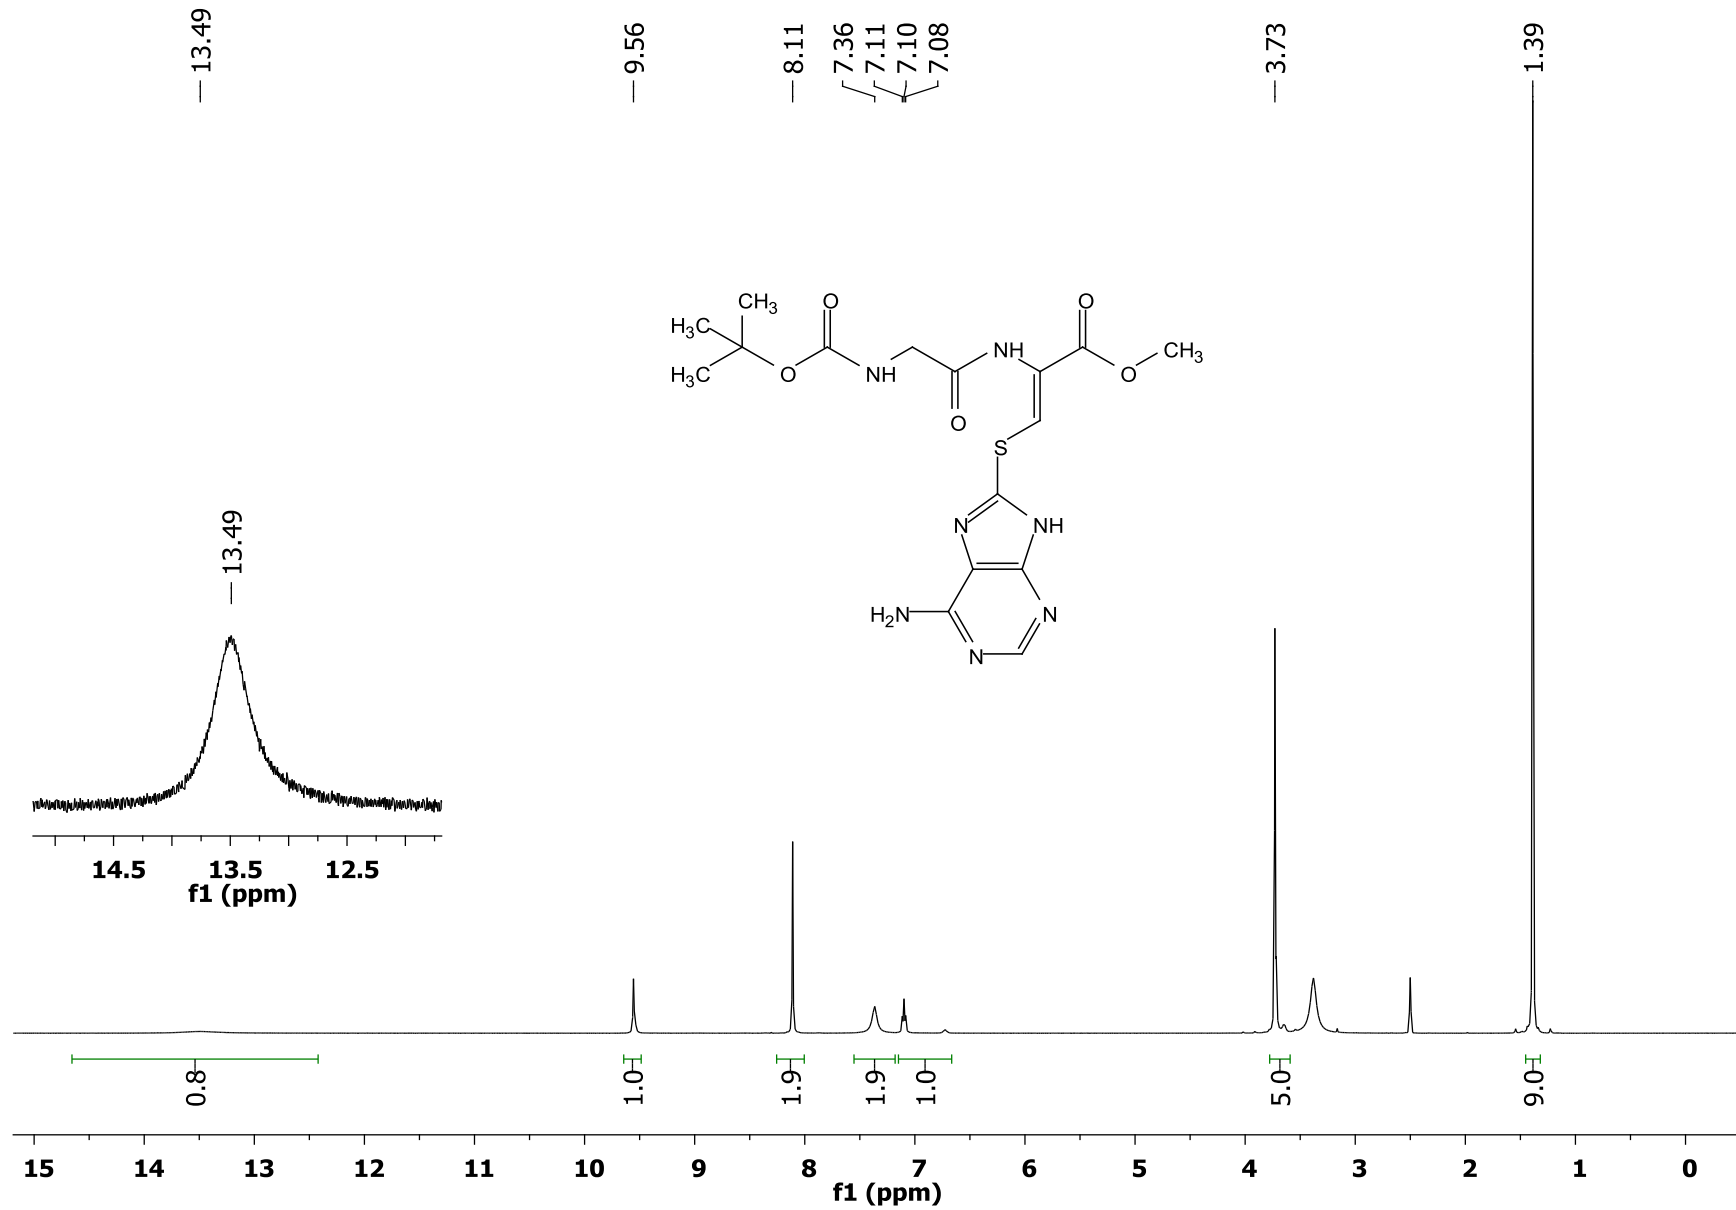

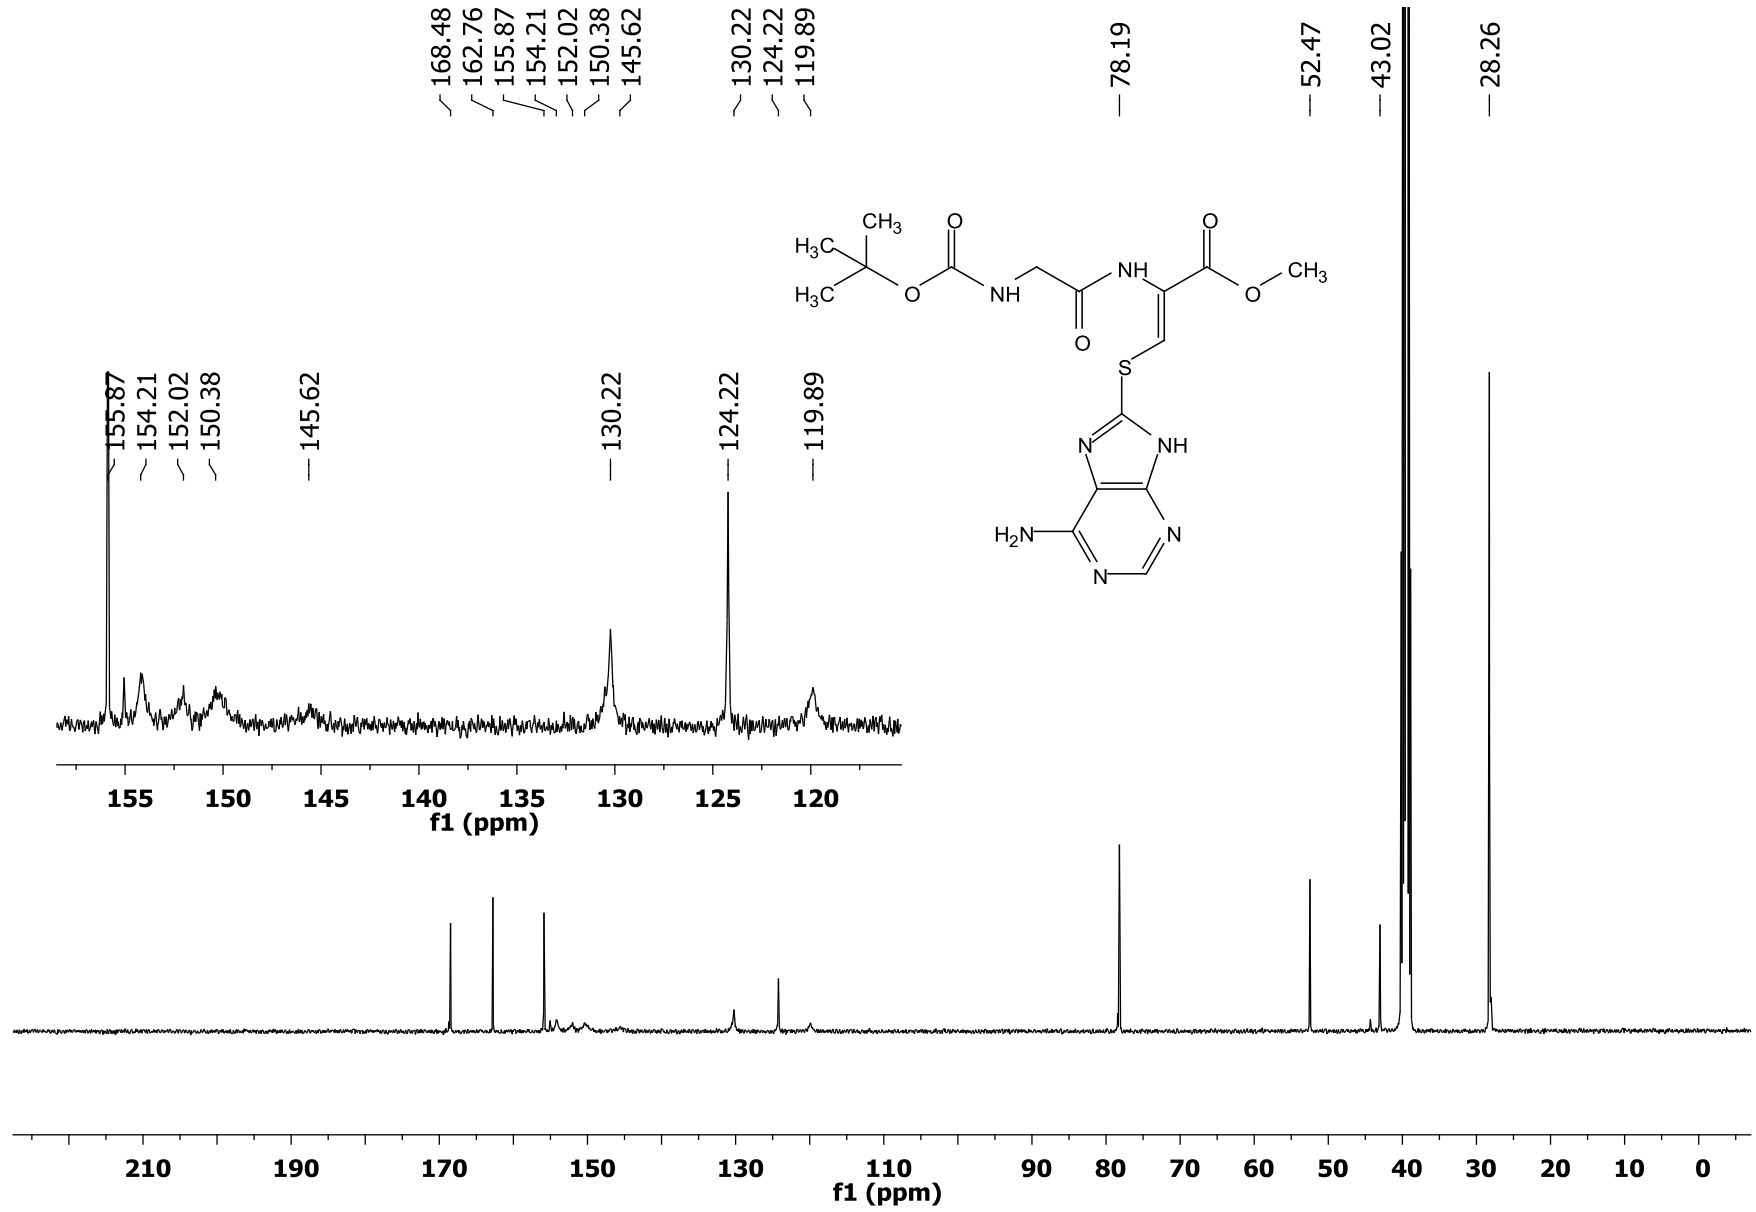

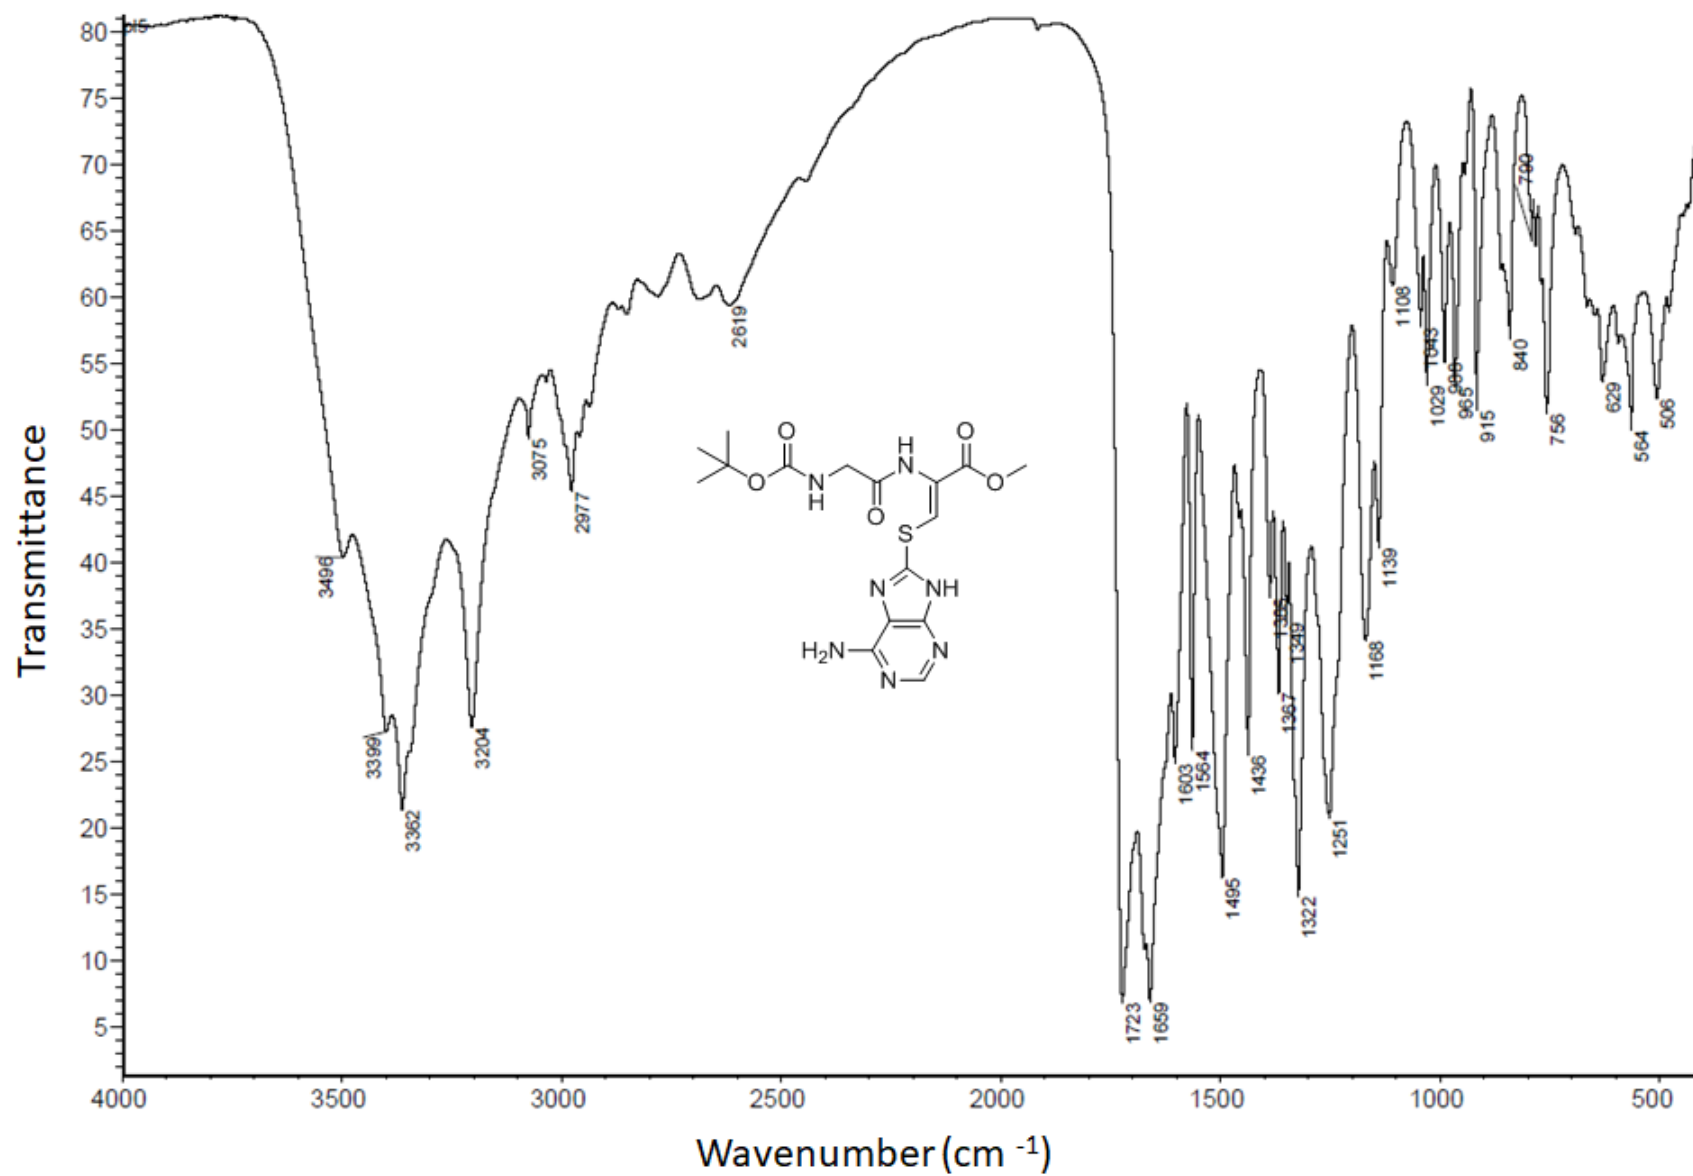

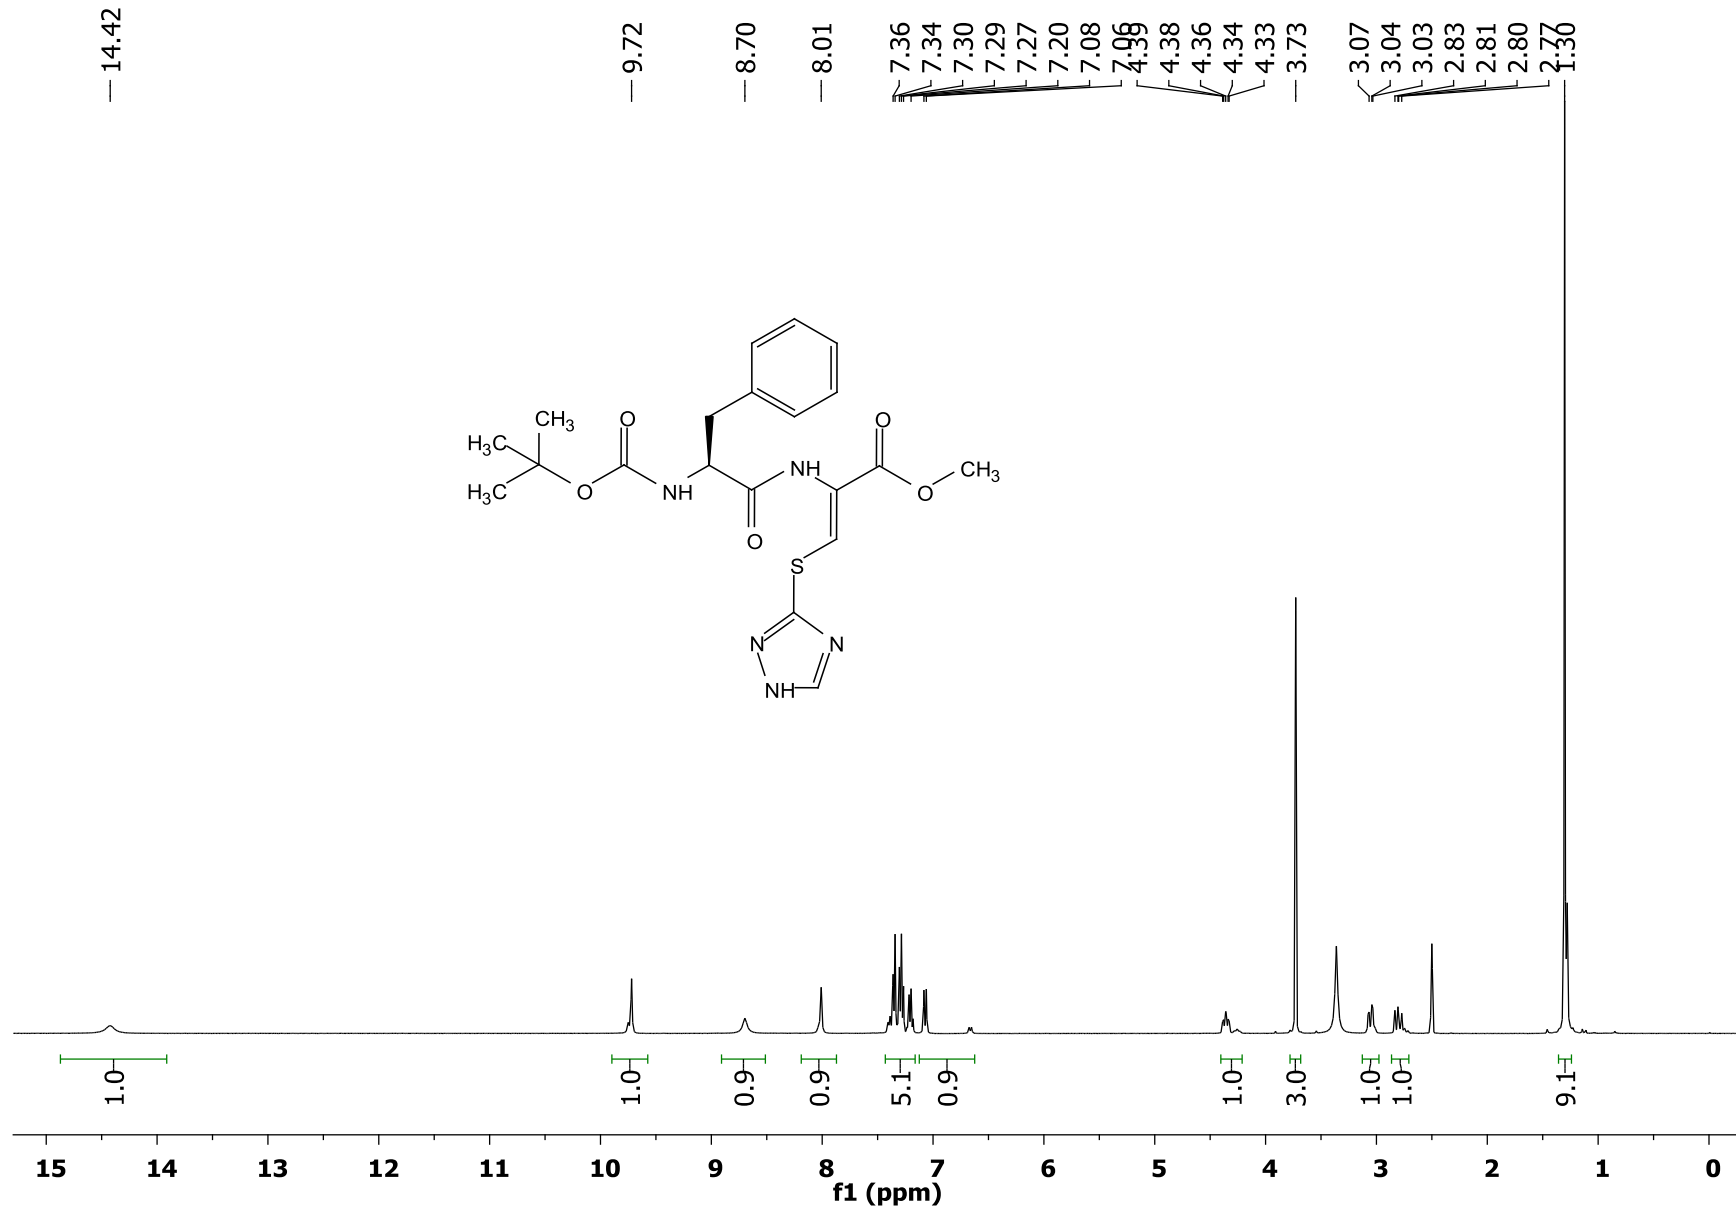



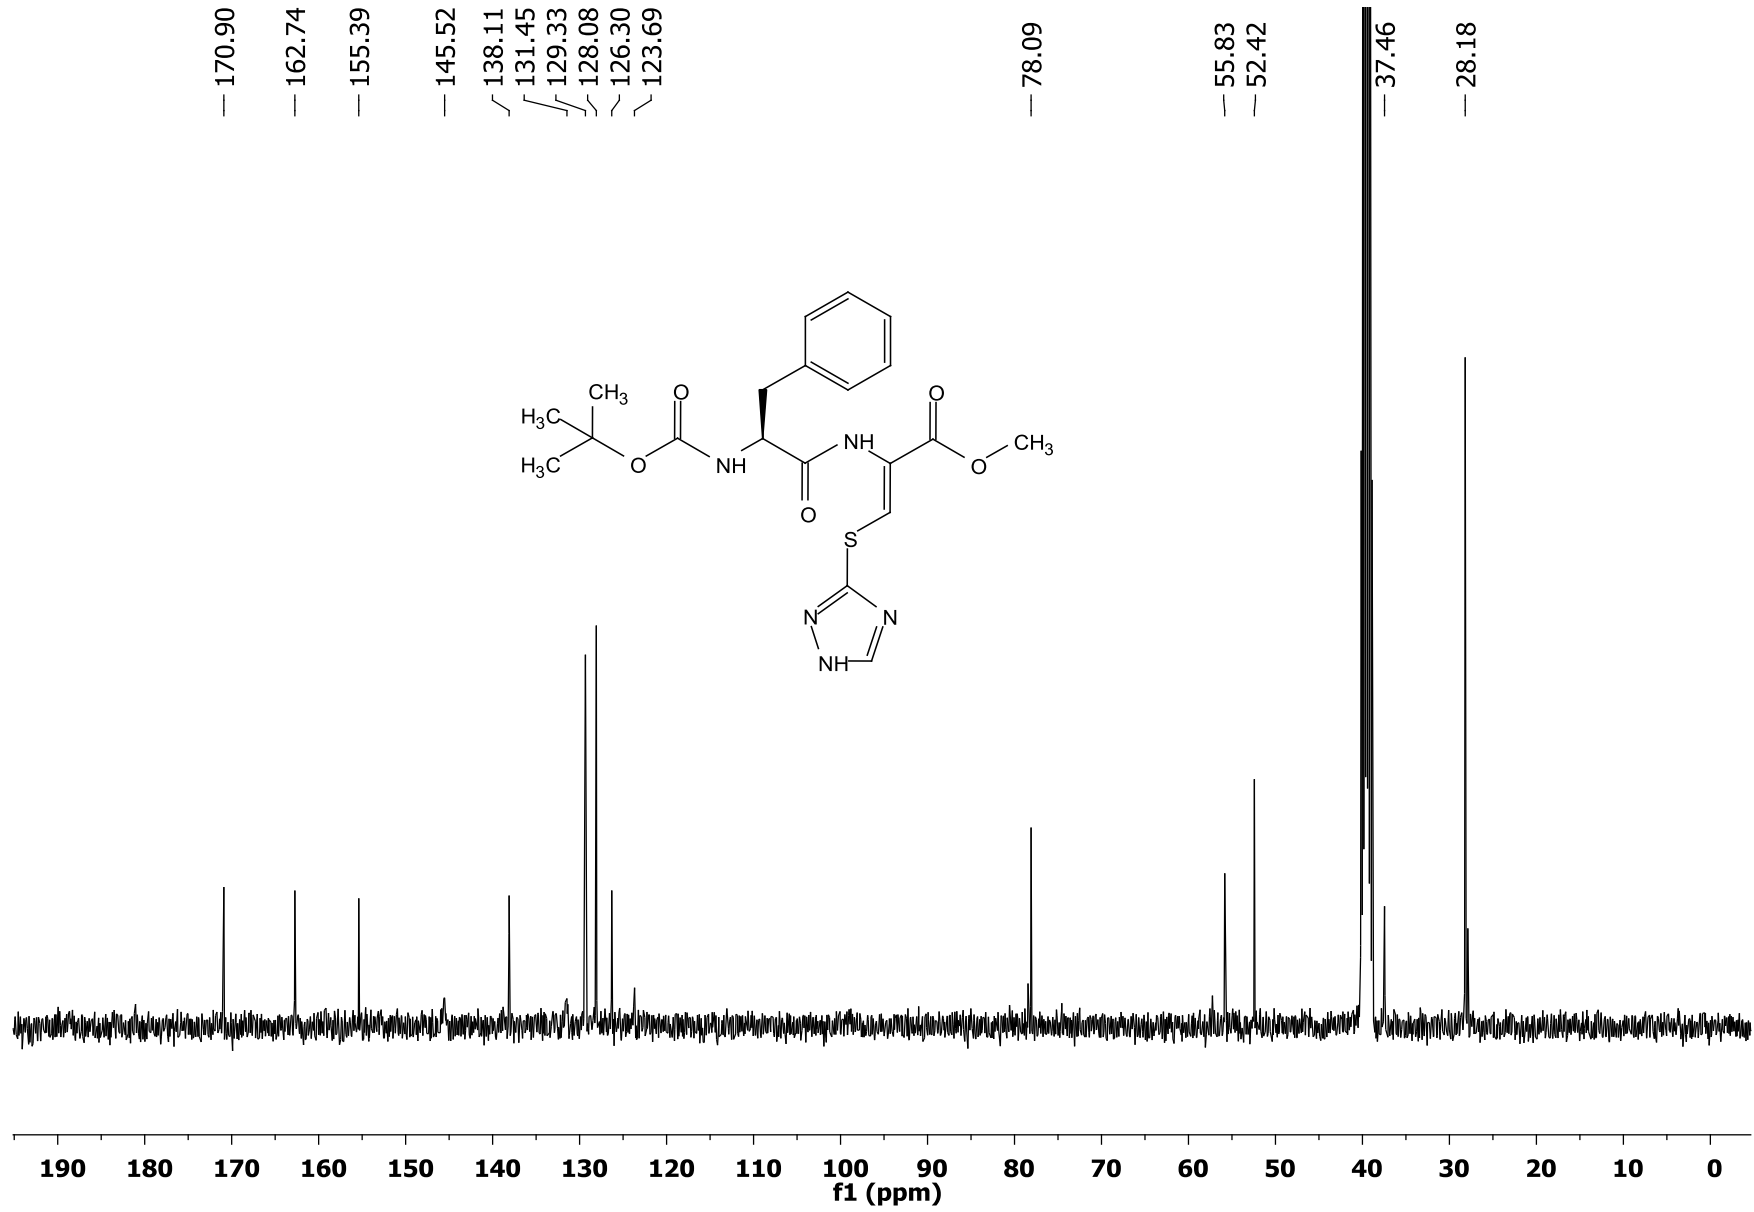

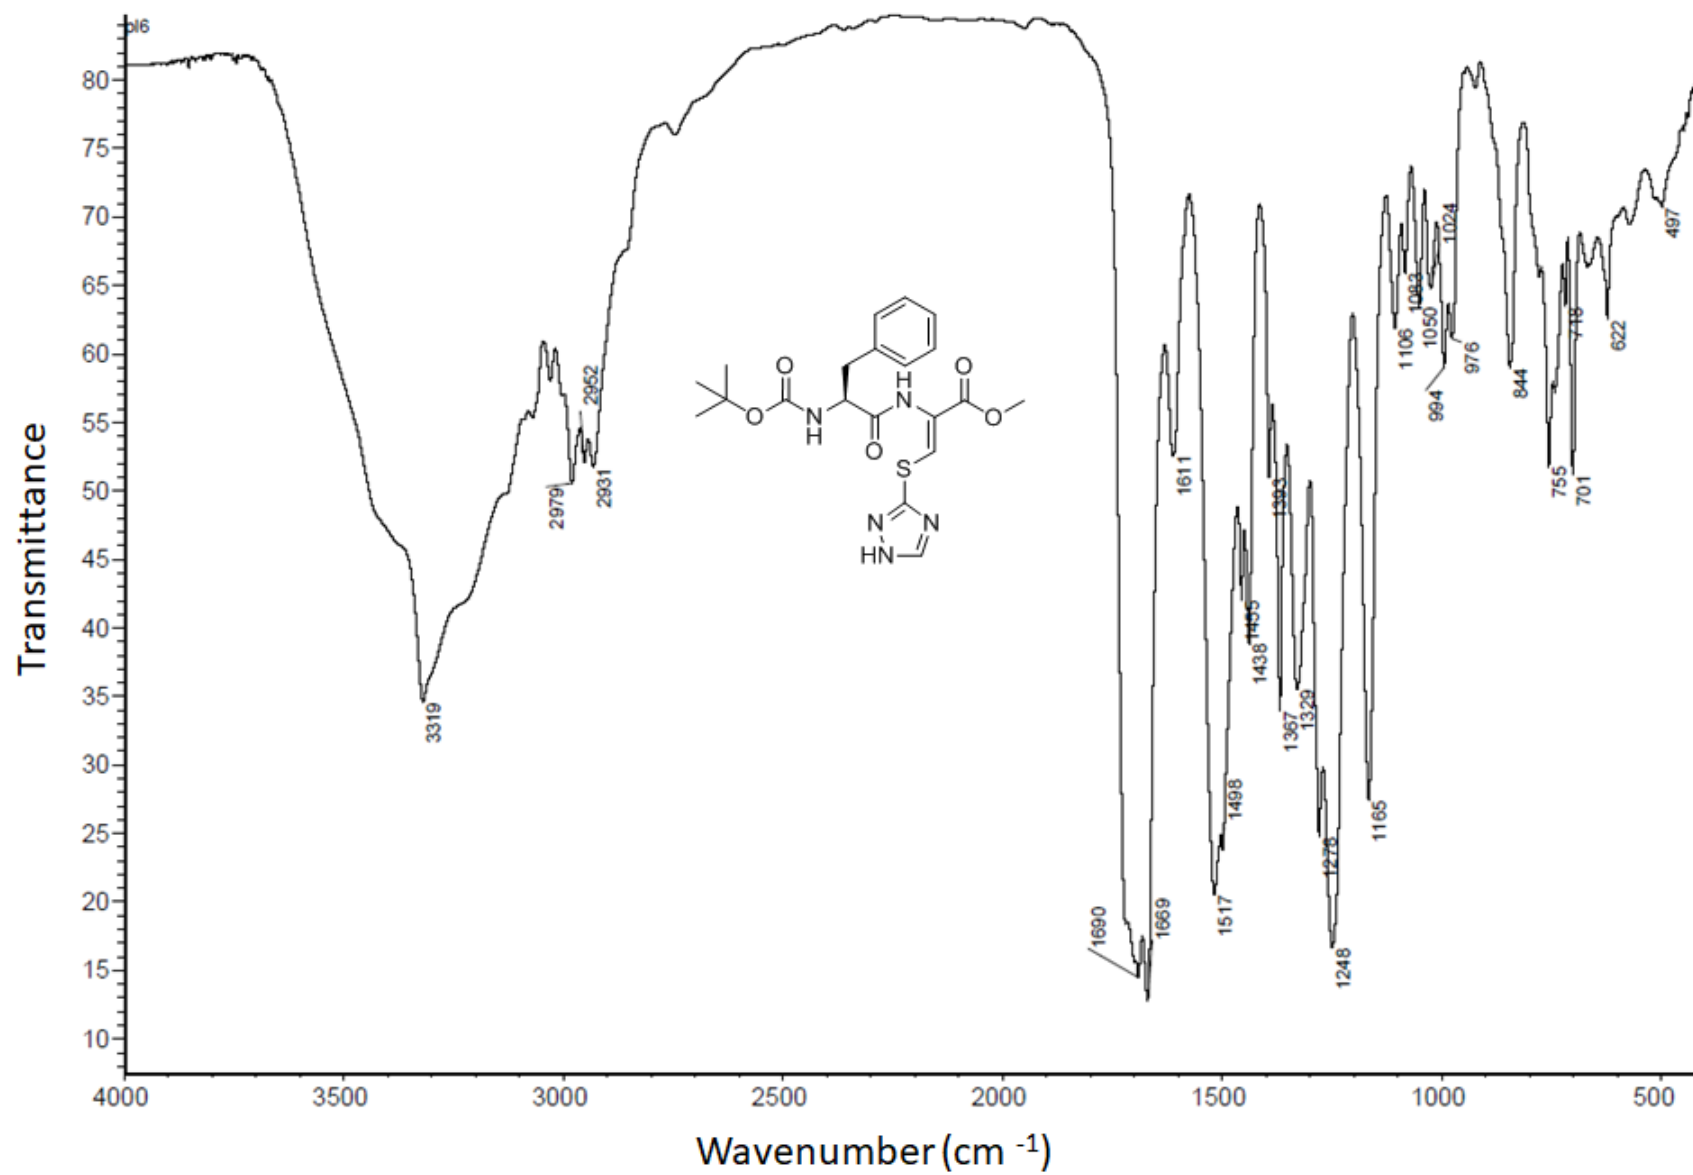

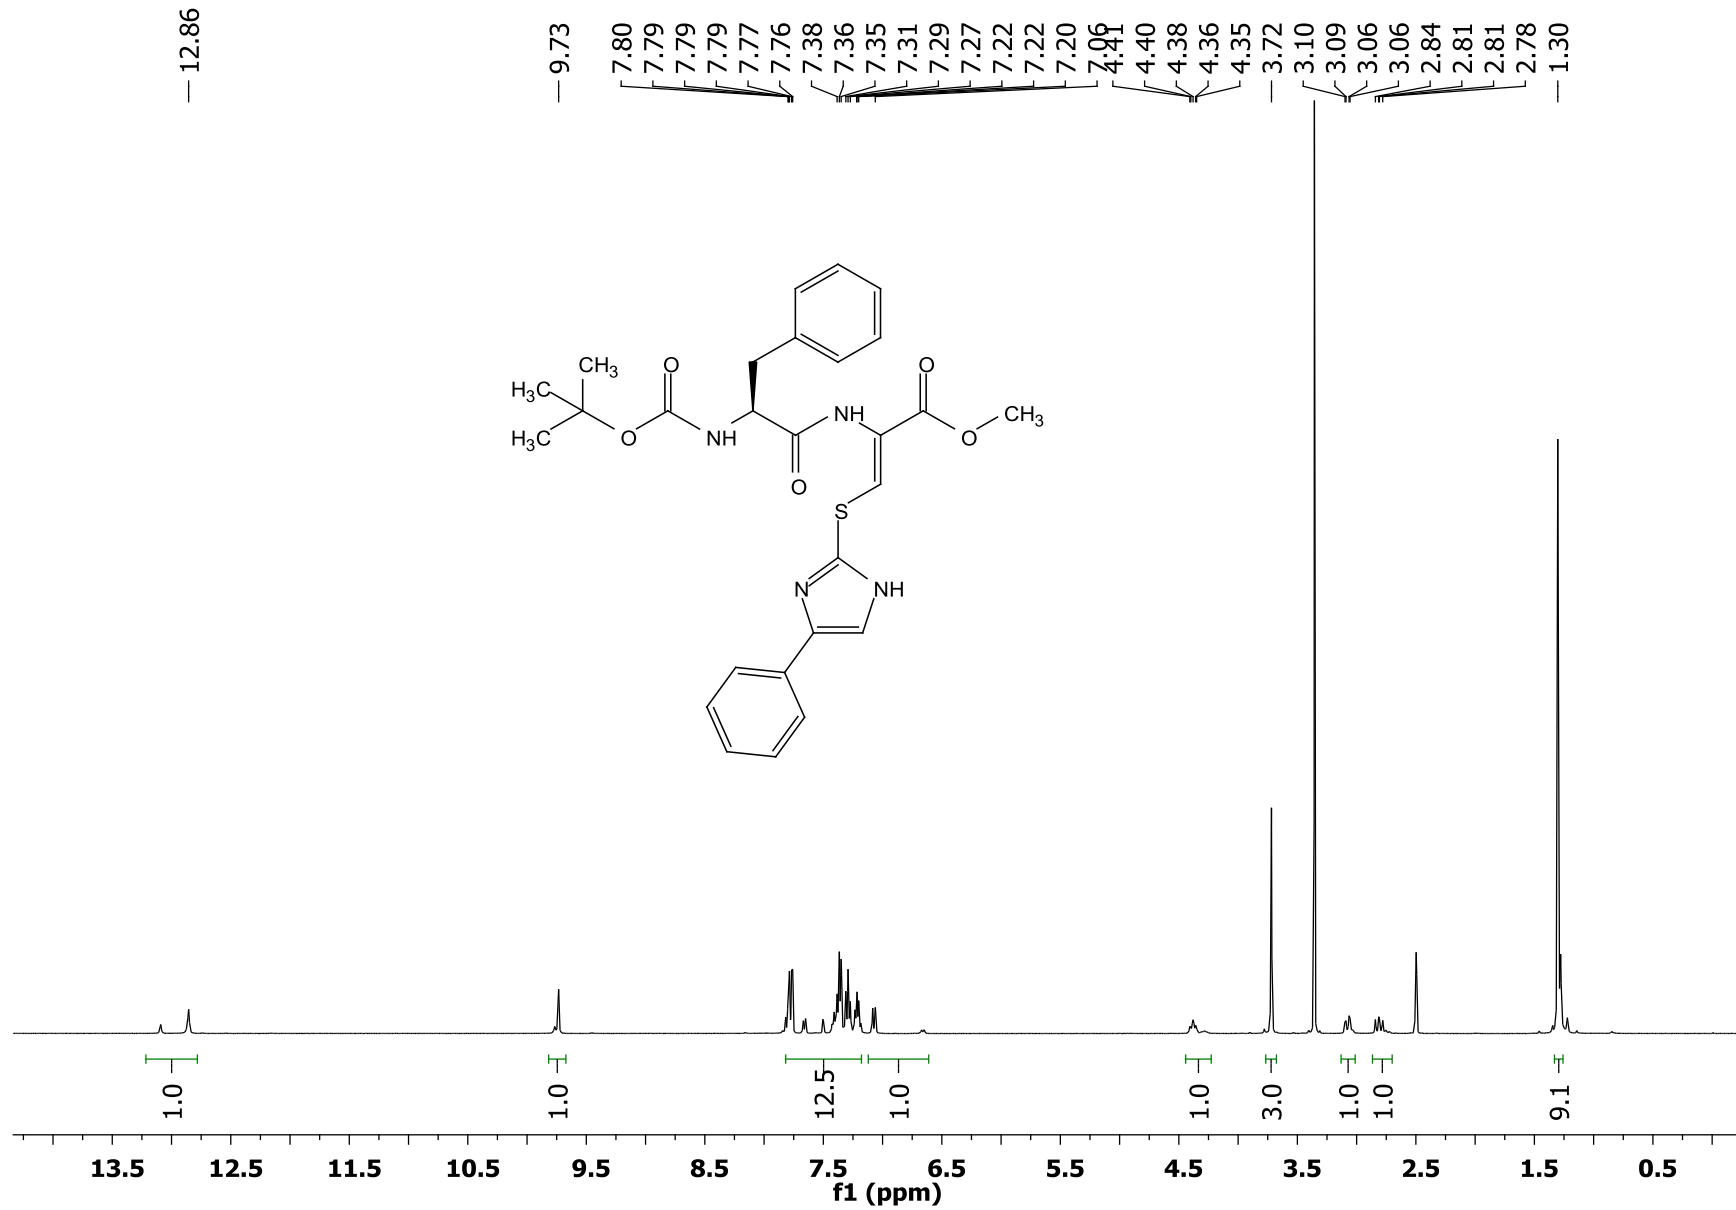

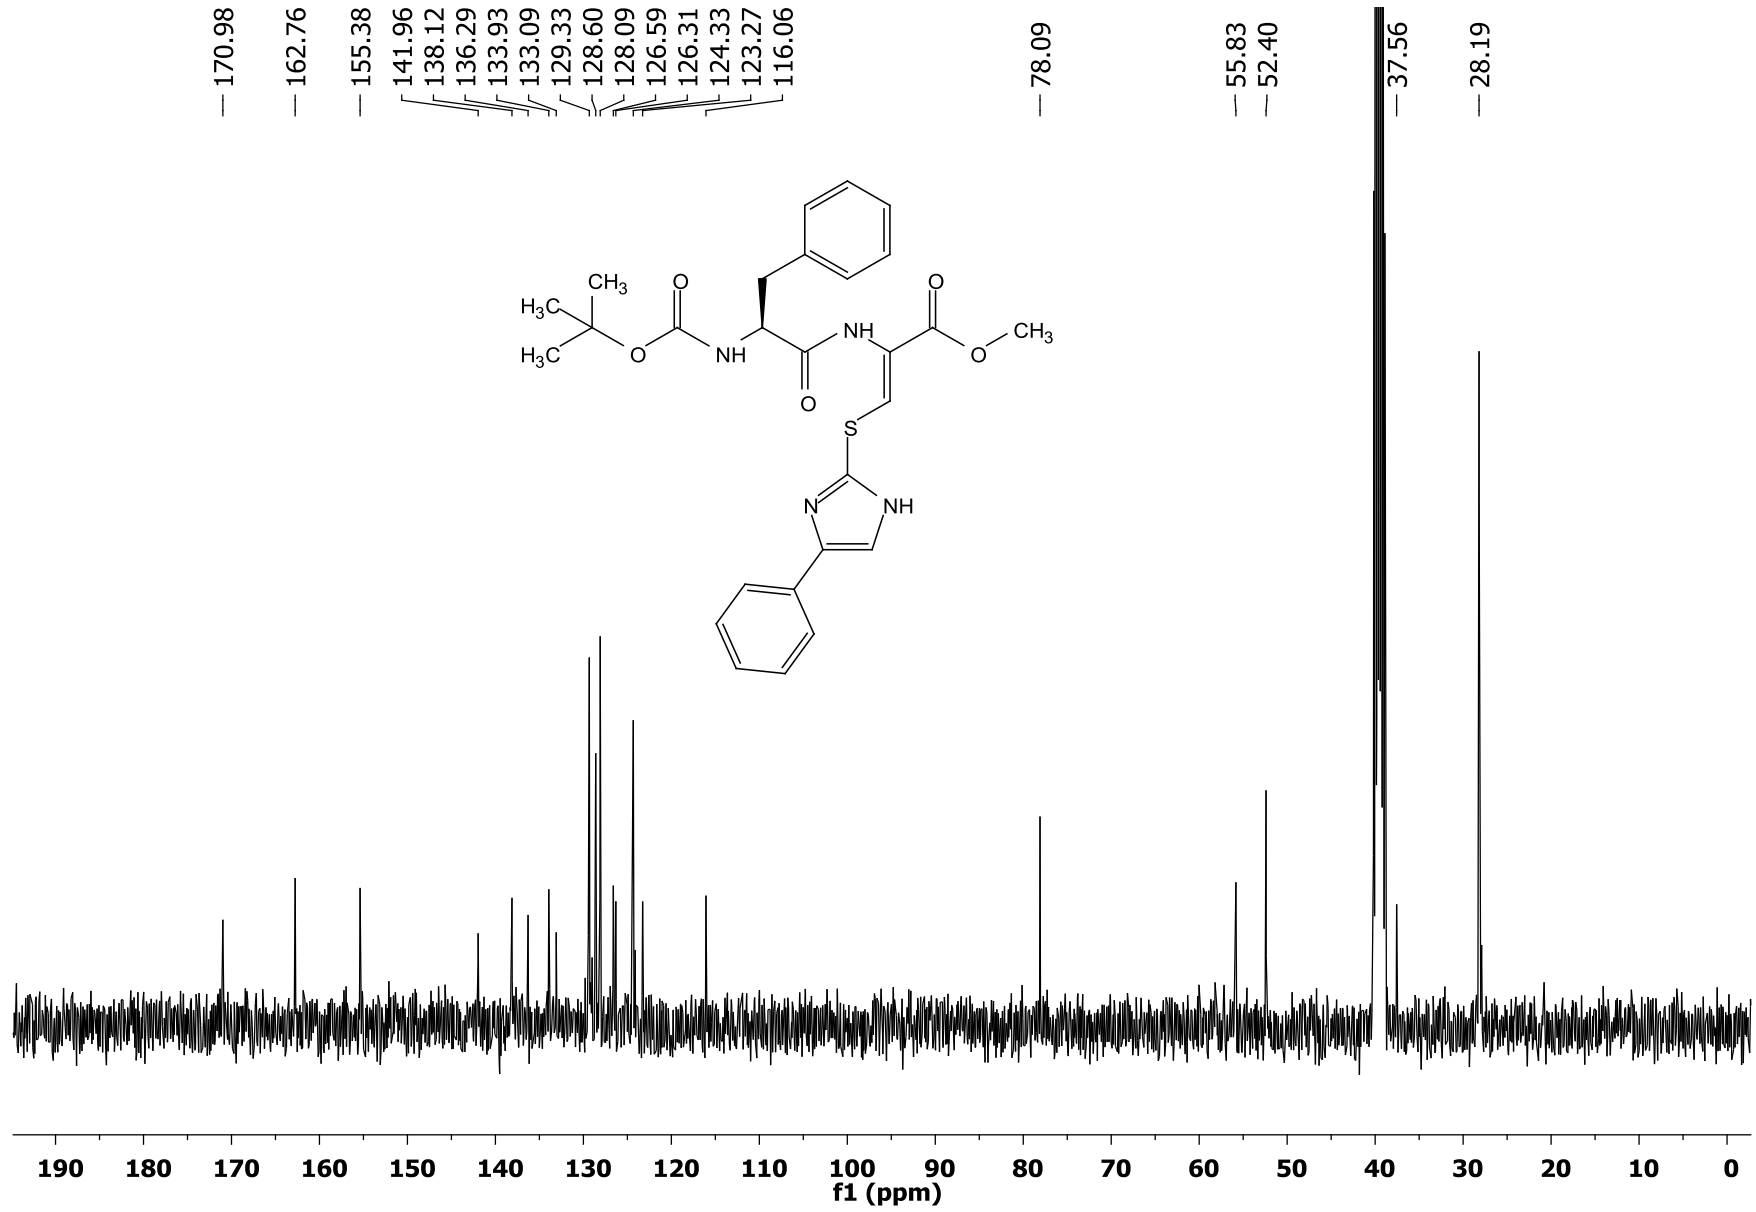

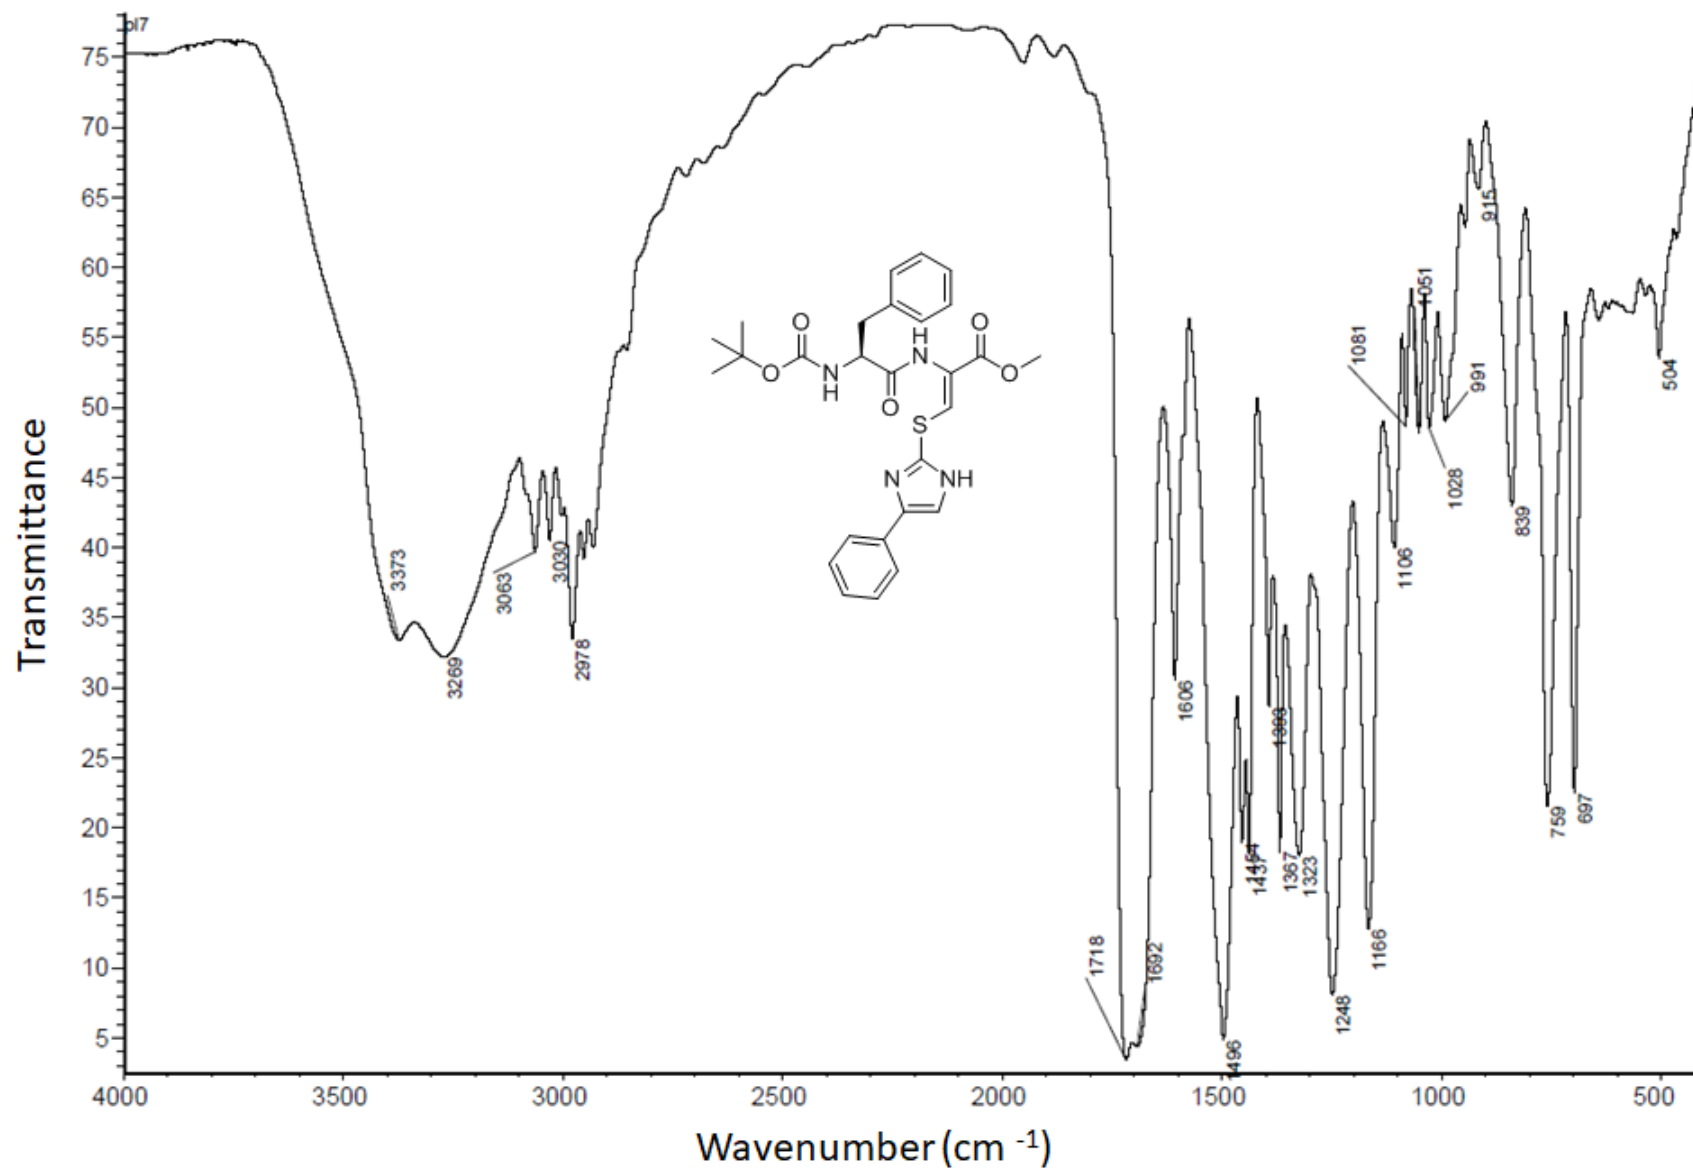

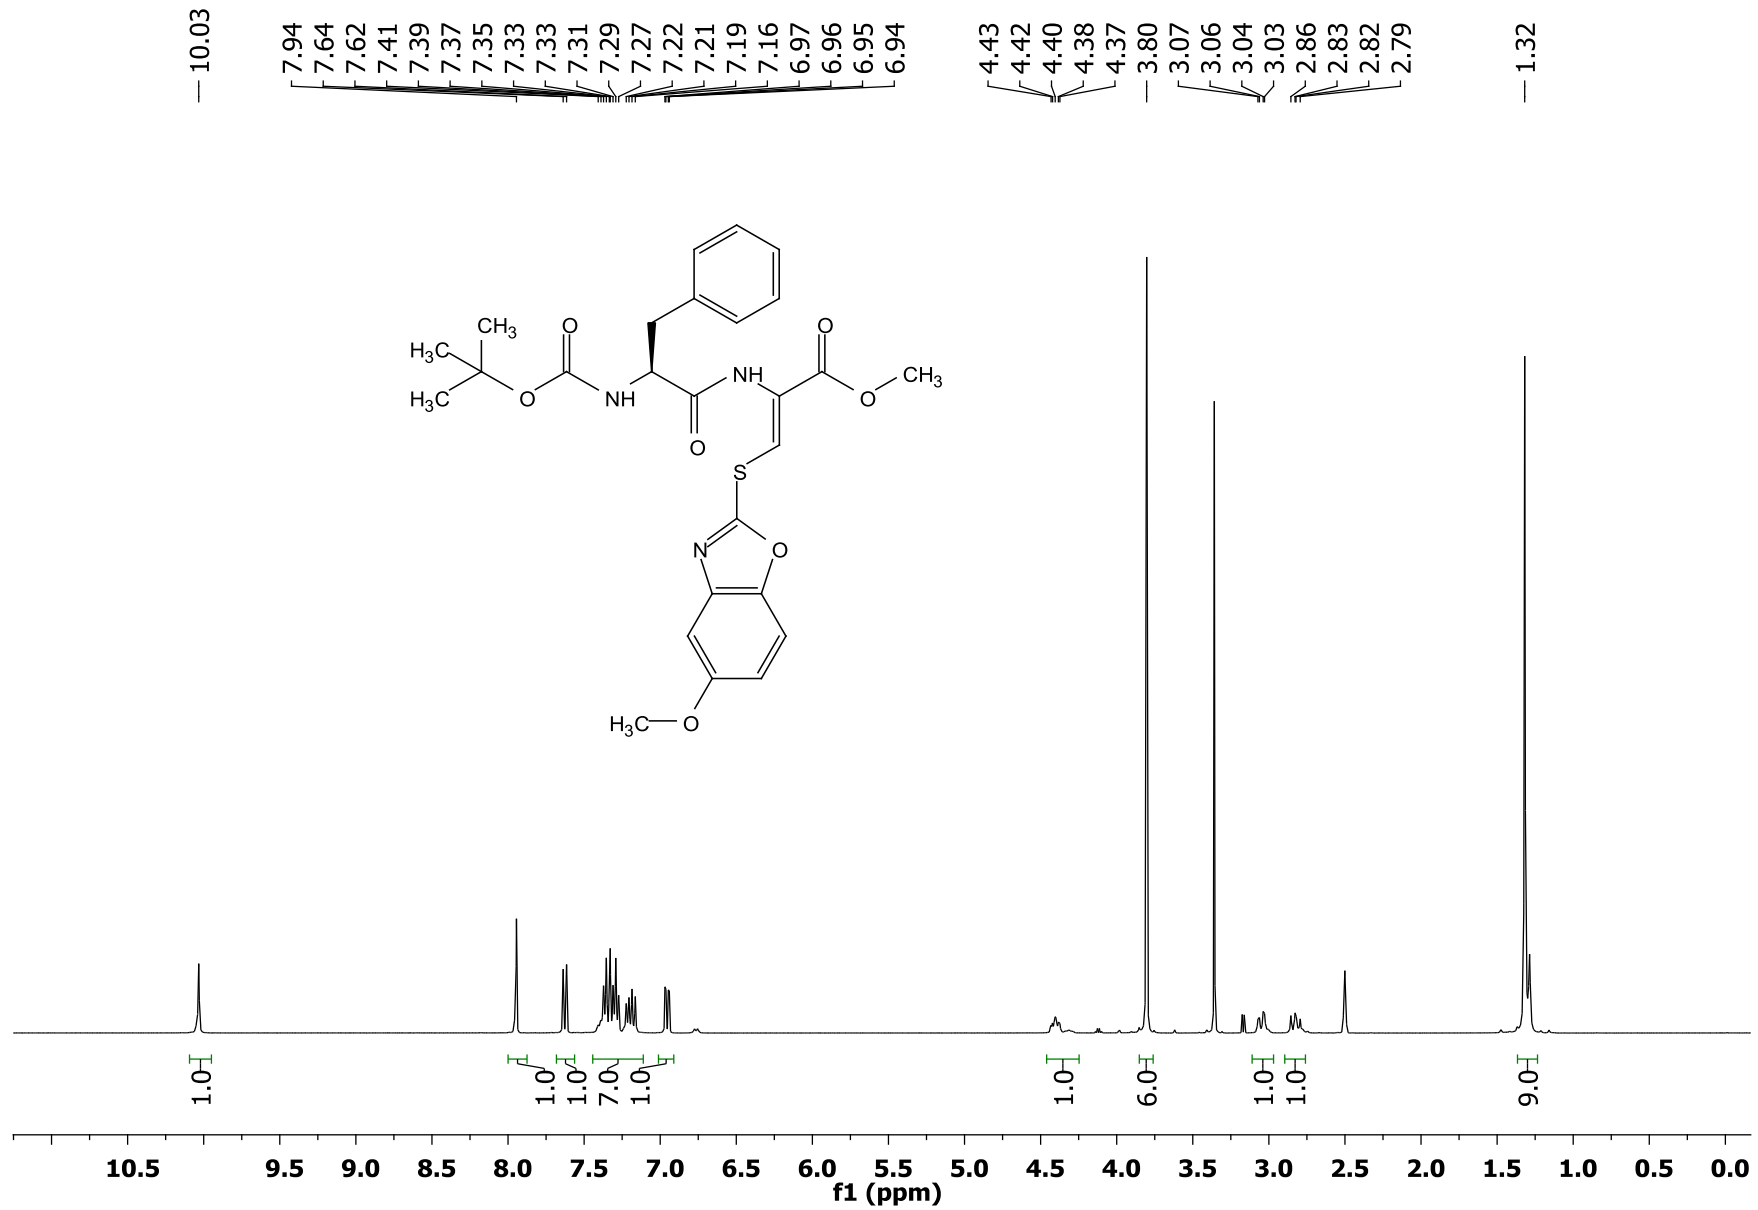

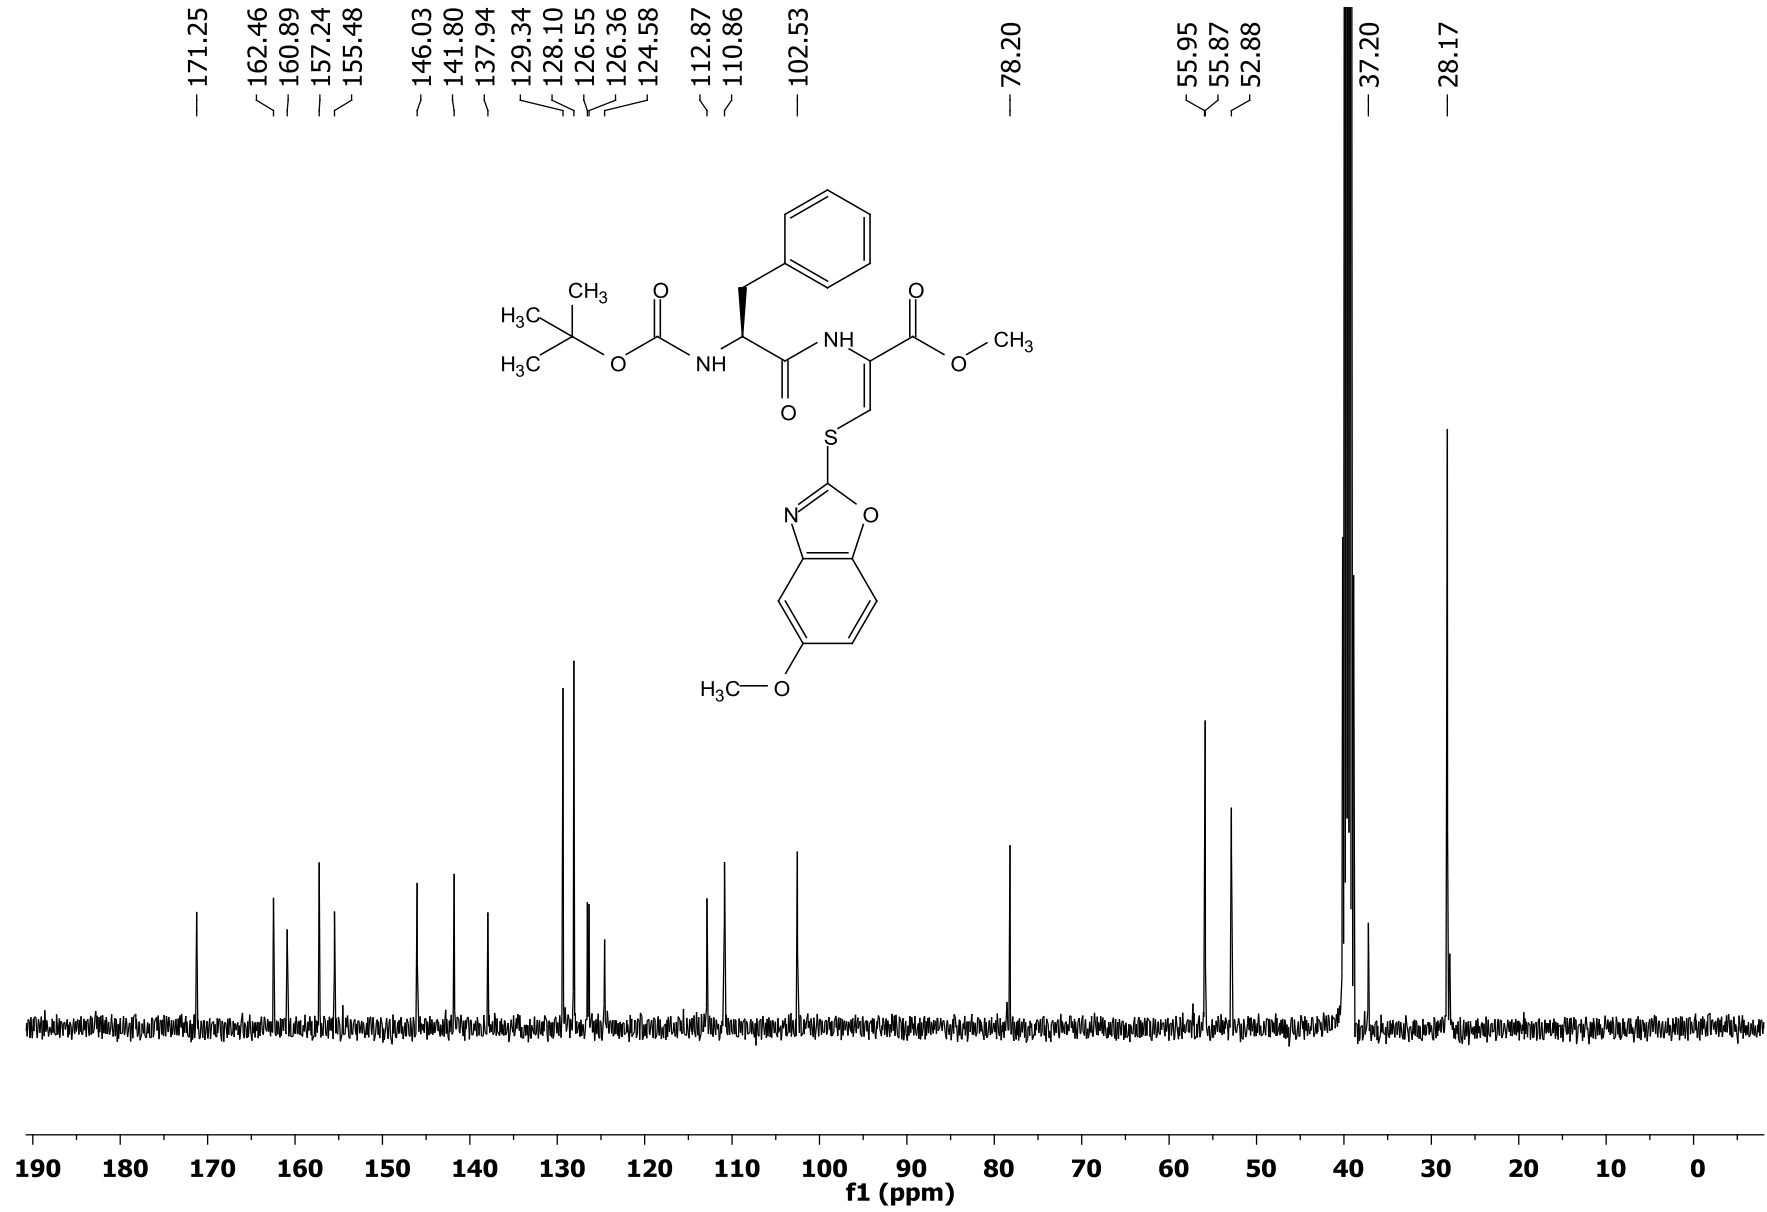

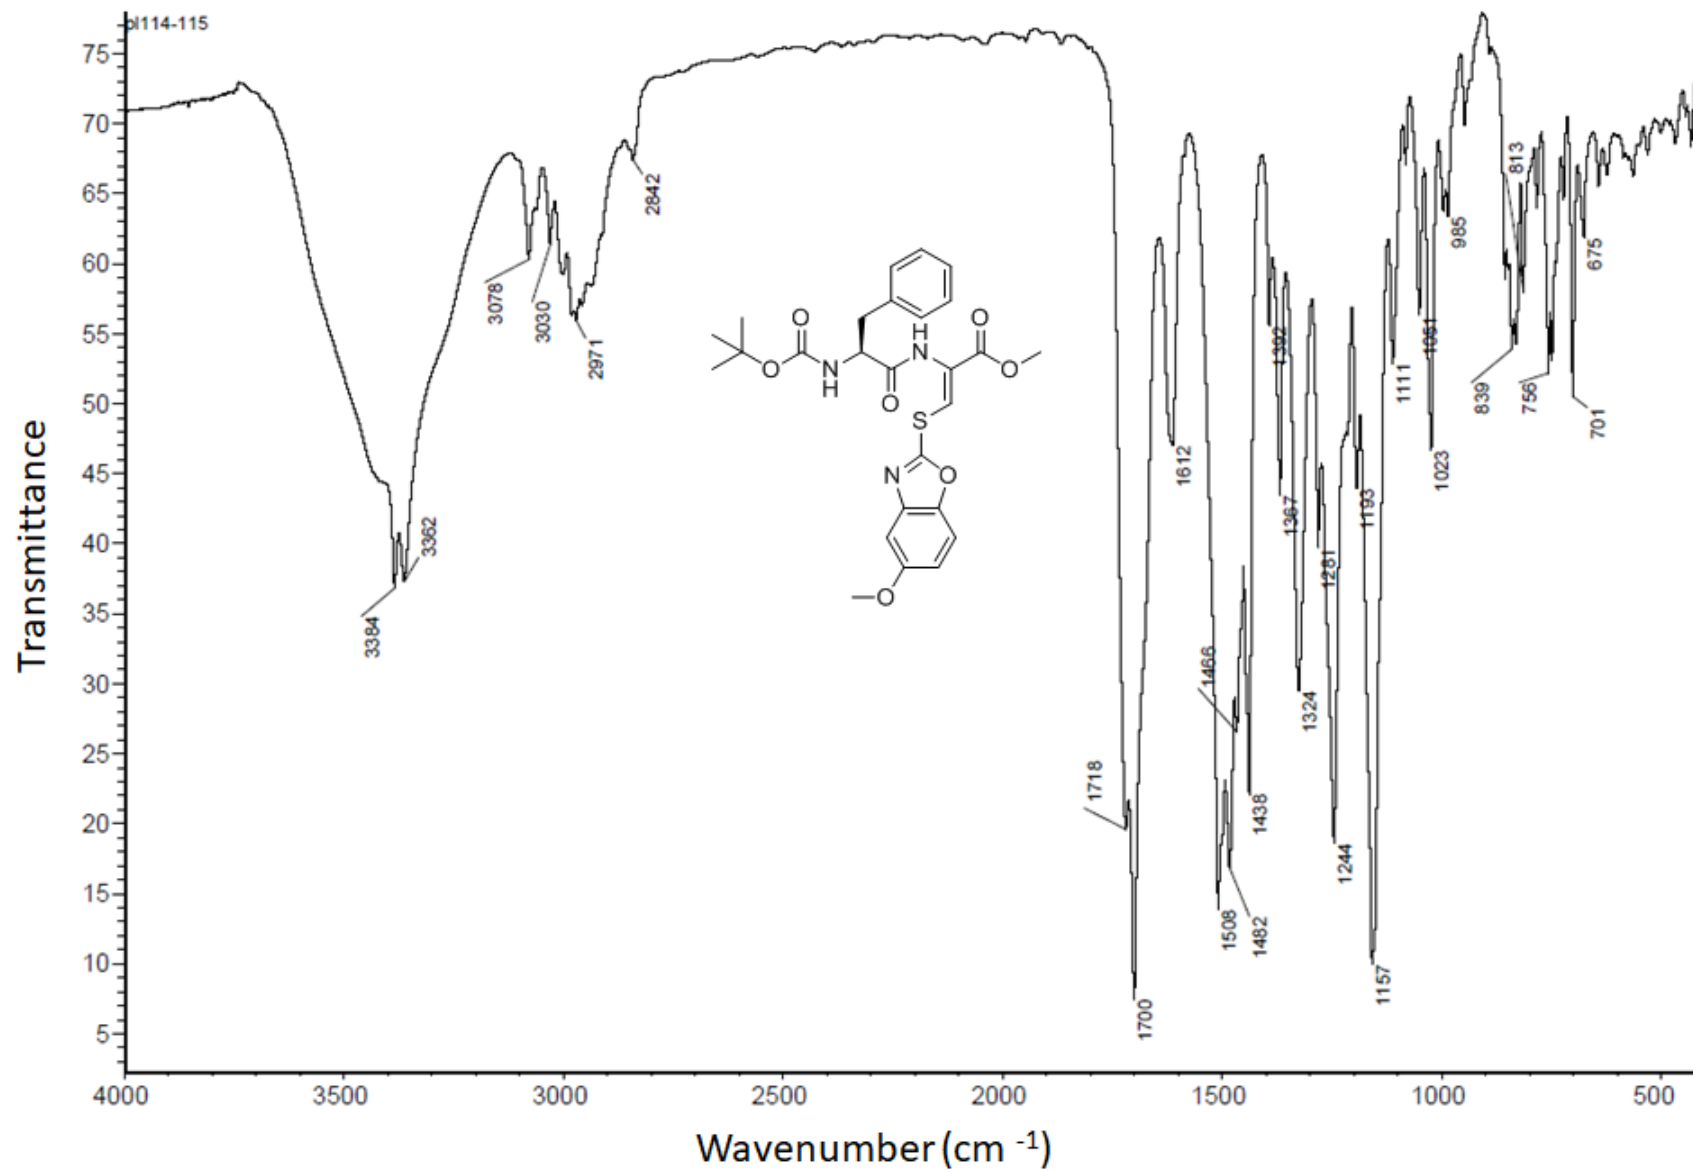



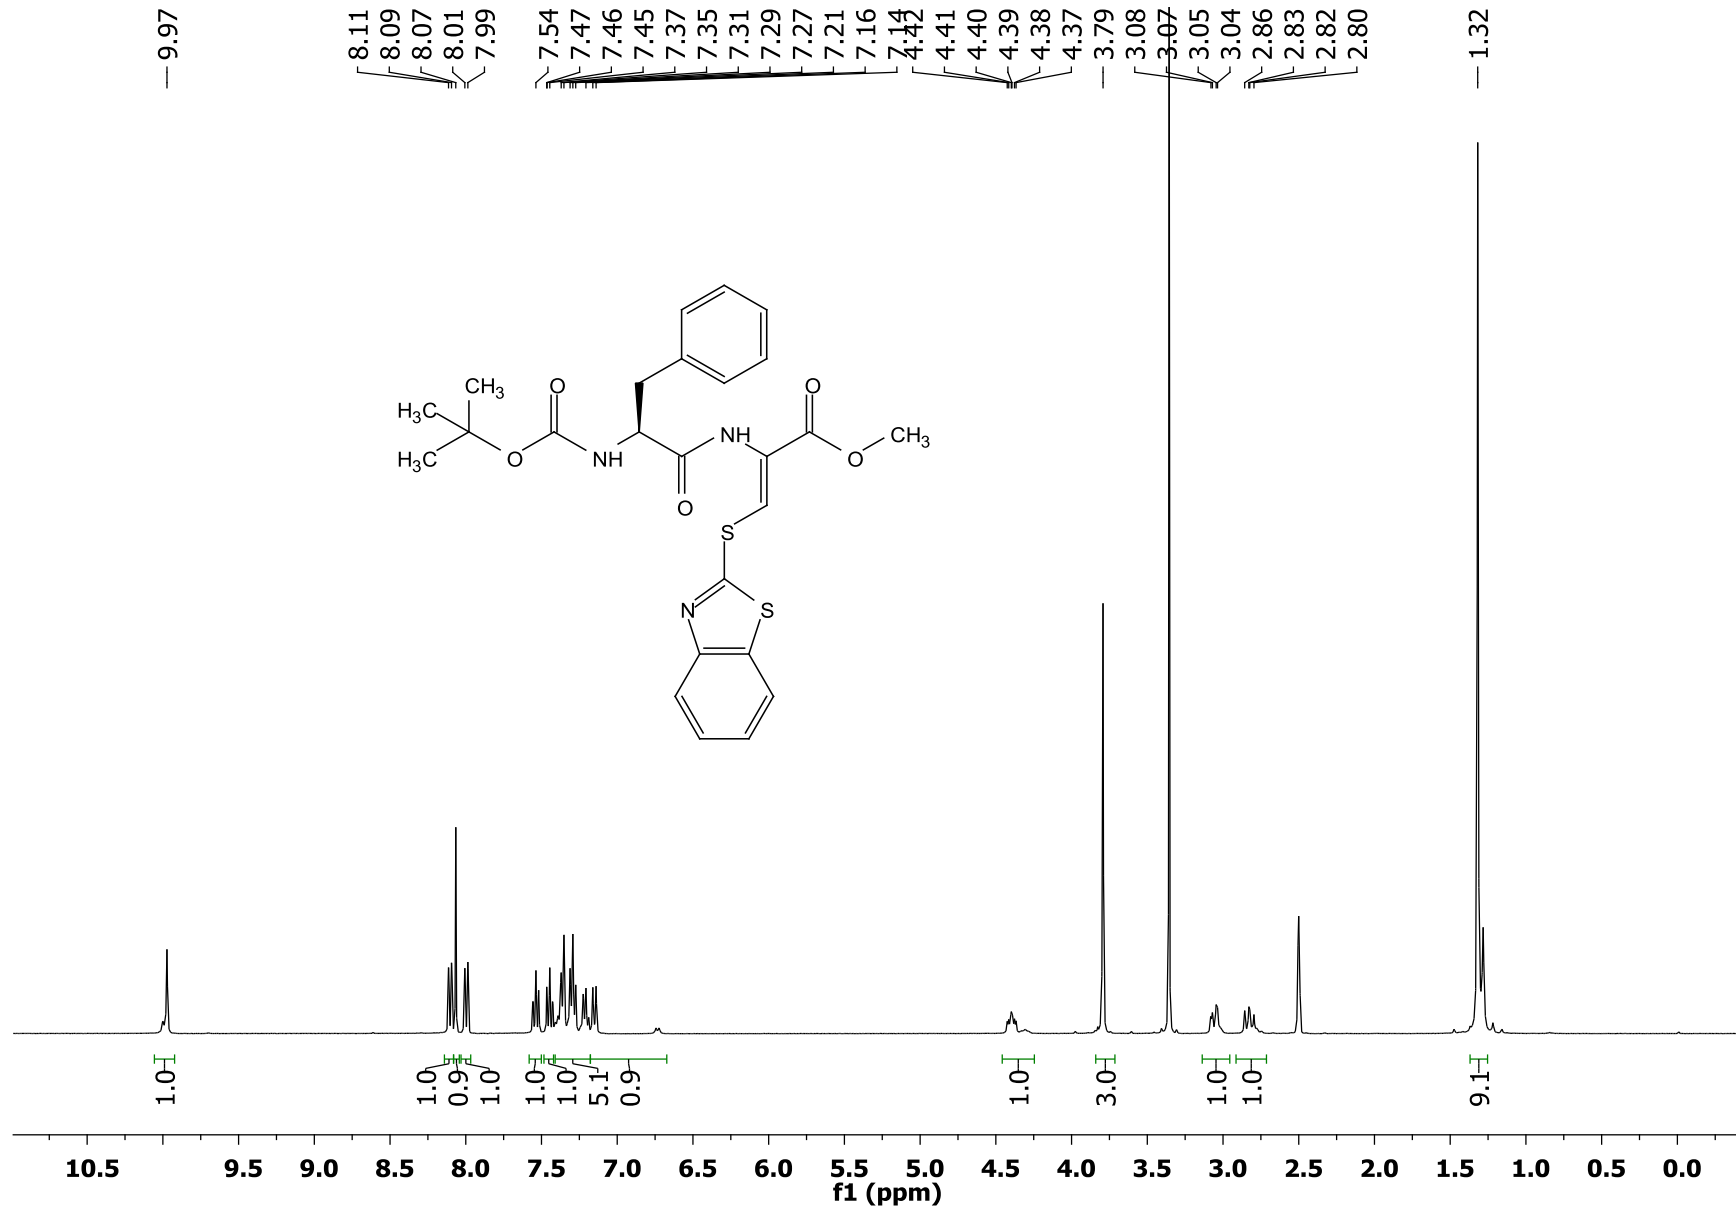

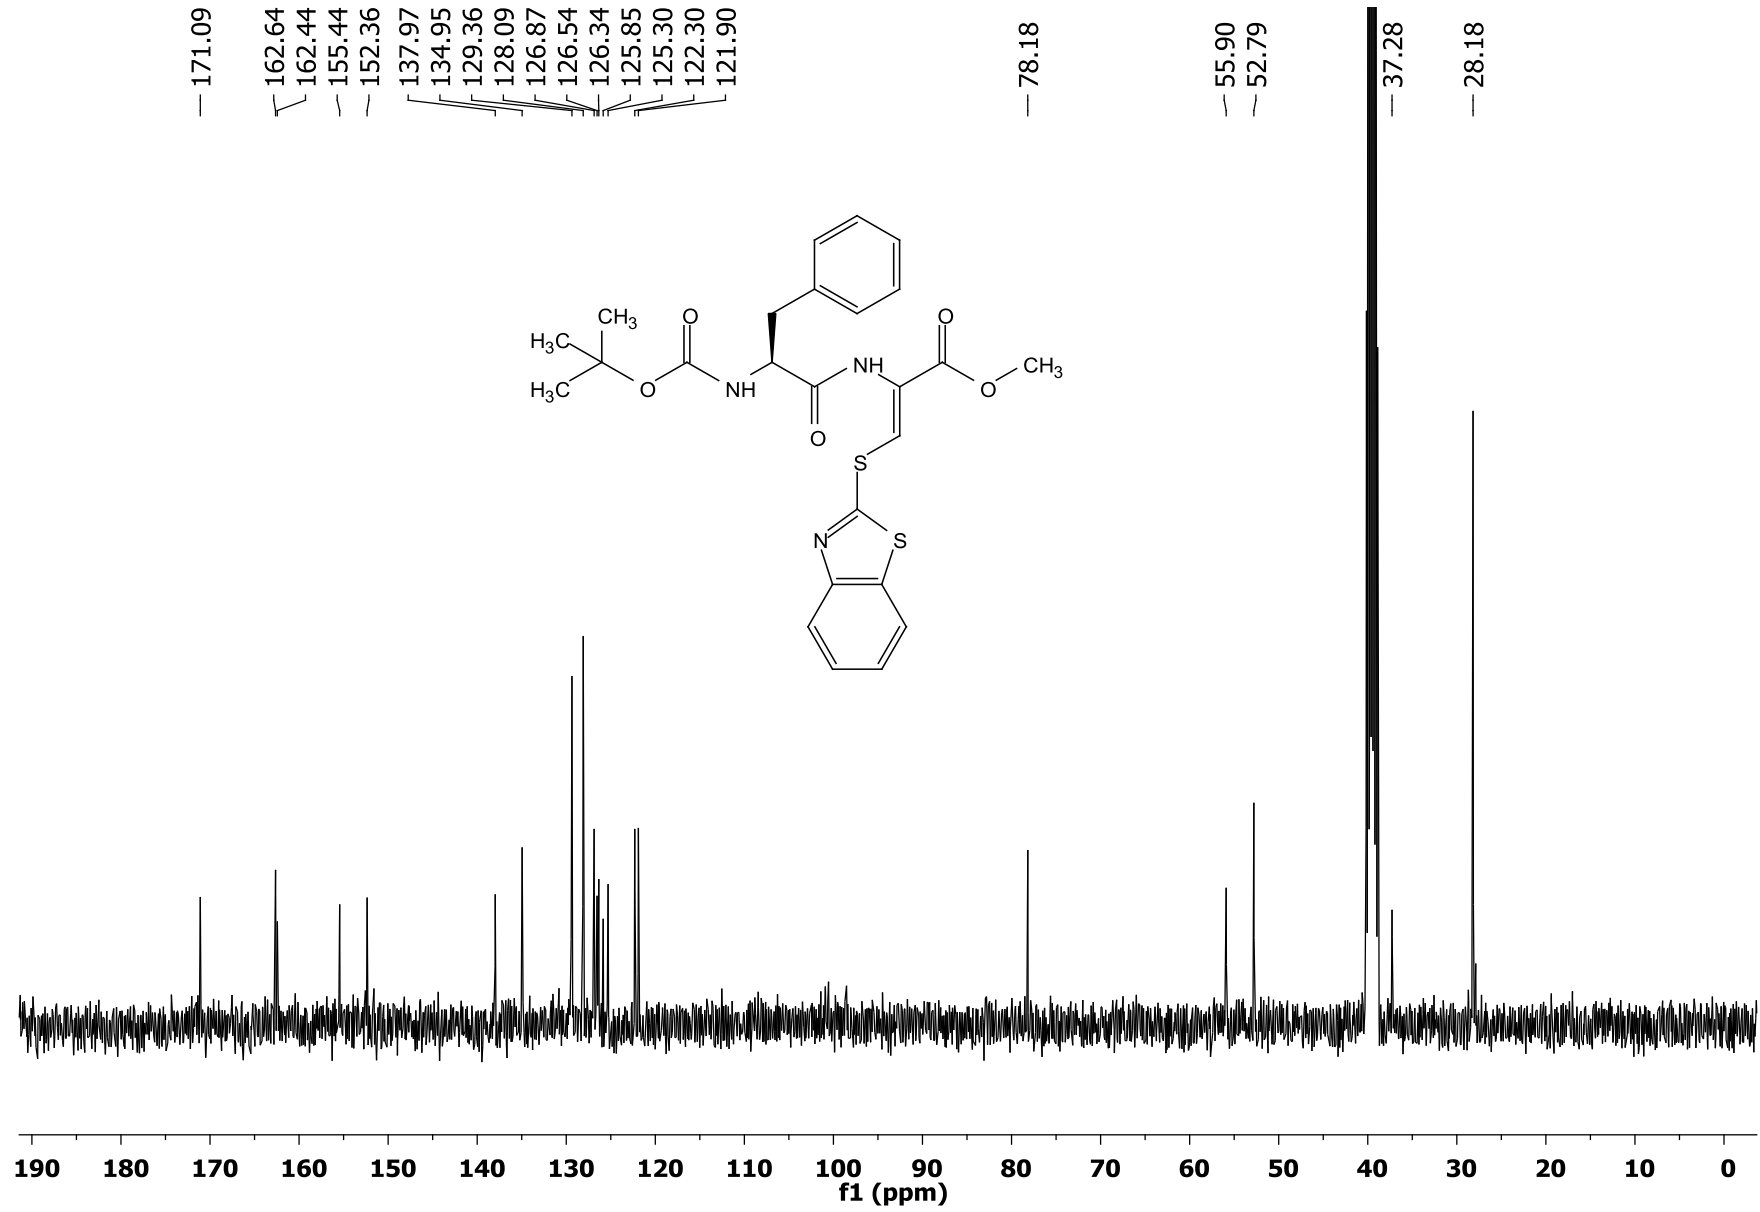

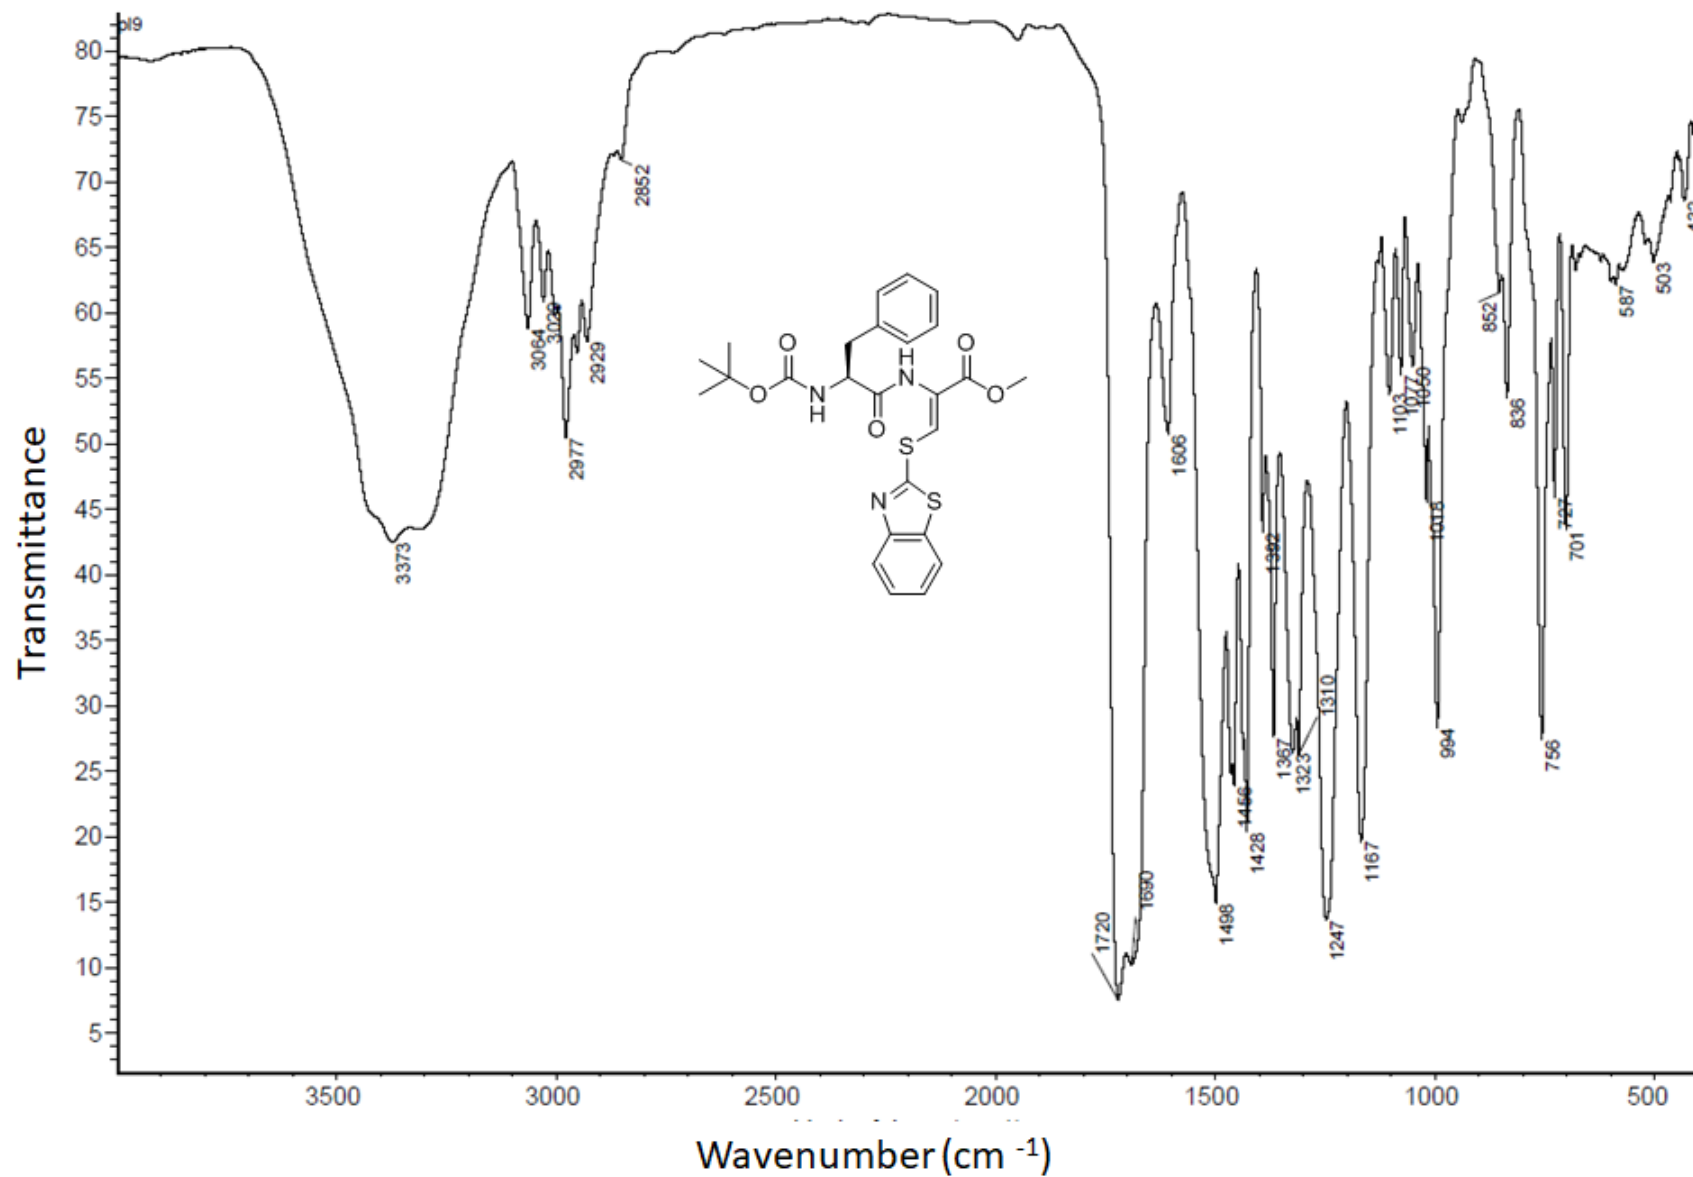

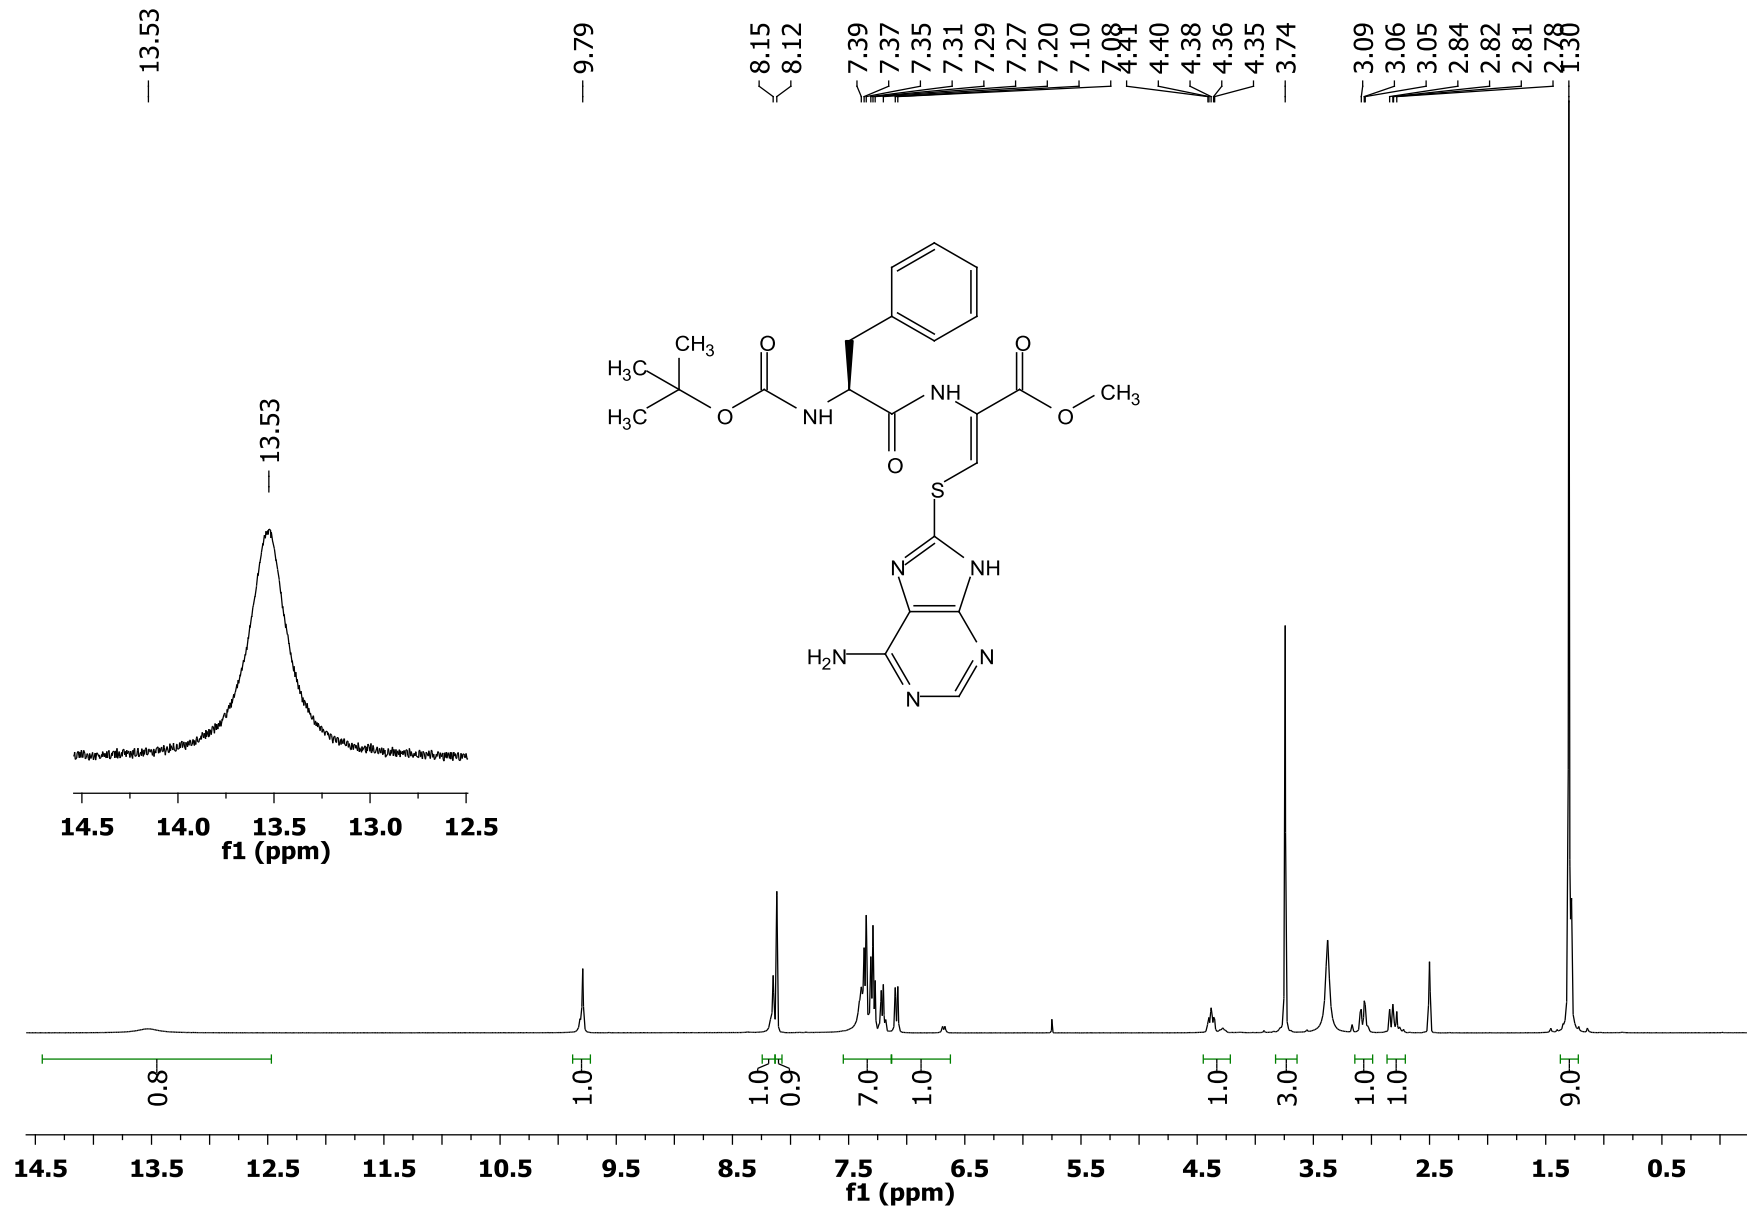

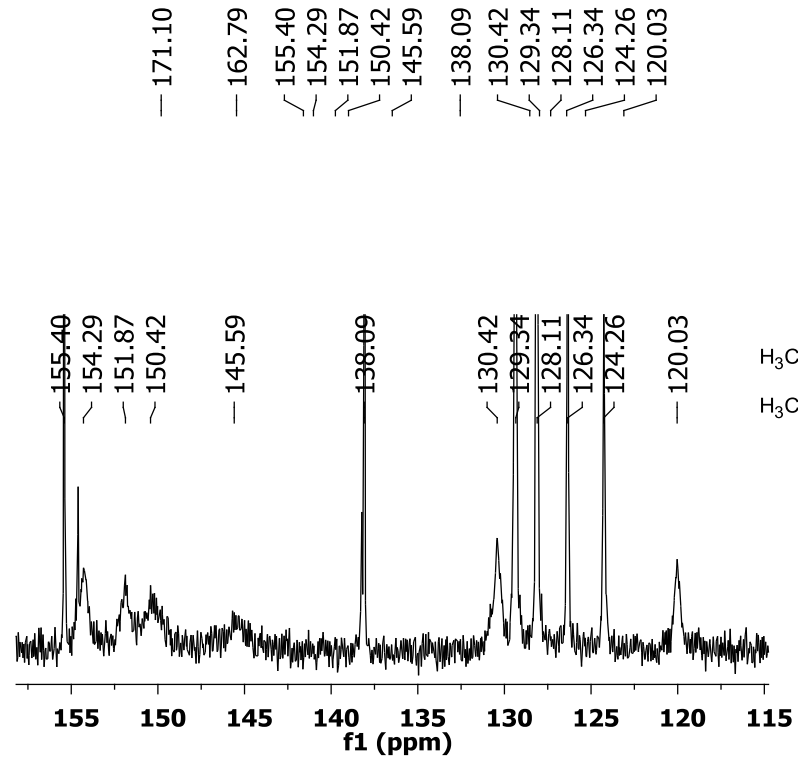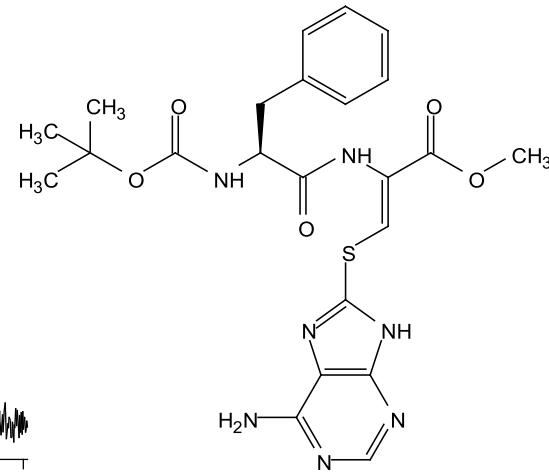

— 171.10  
— 162.79  
— 155.40  
— 154.29  
— 151.87  
— 150.42  
— 145.59  
— 138.09  
— 130.42  
— 129.34  
— 128.11  
— 126.34  
— 124.26  
— 120.03  
— 78.13  
— 55.85  
— 52.47  
— 37.50  
— 28.20

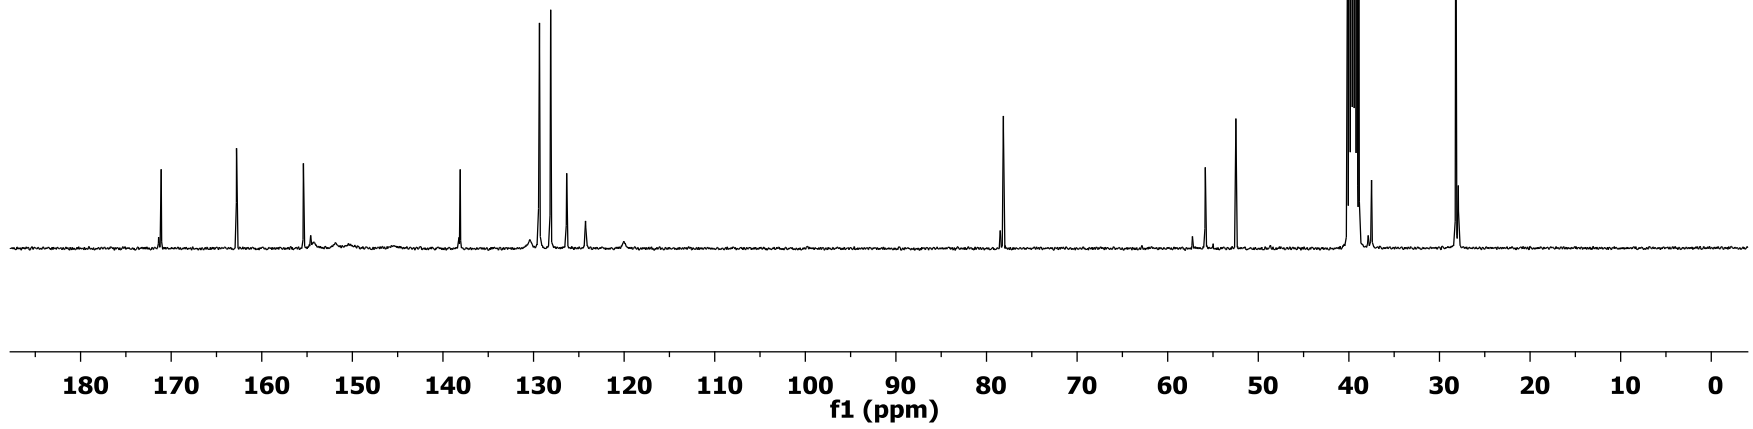

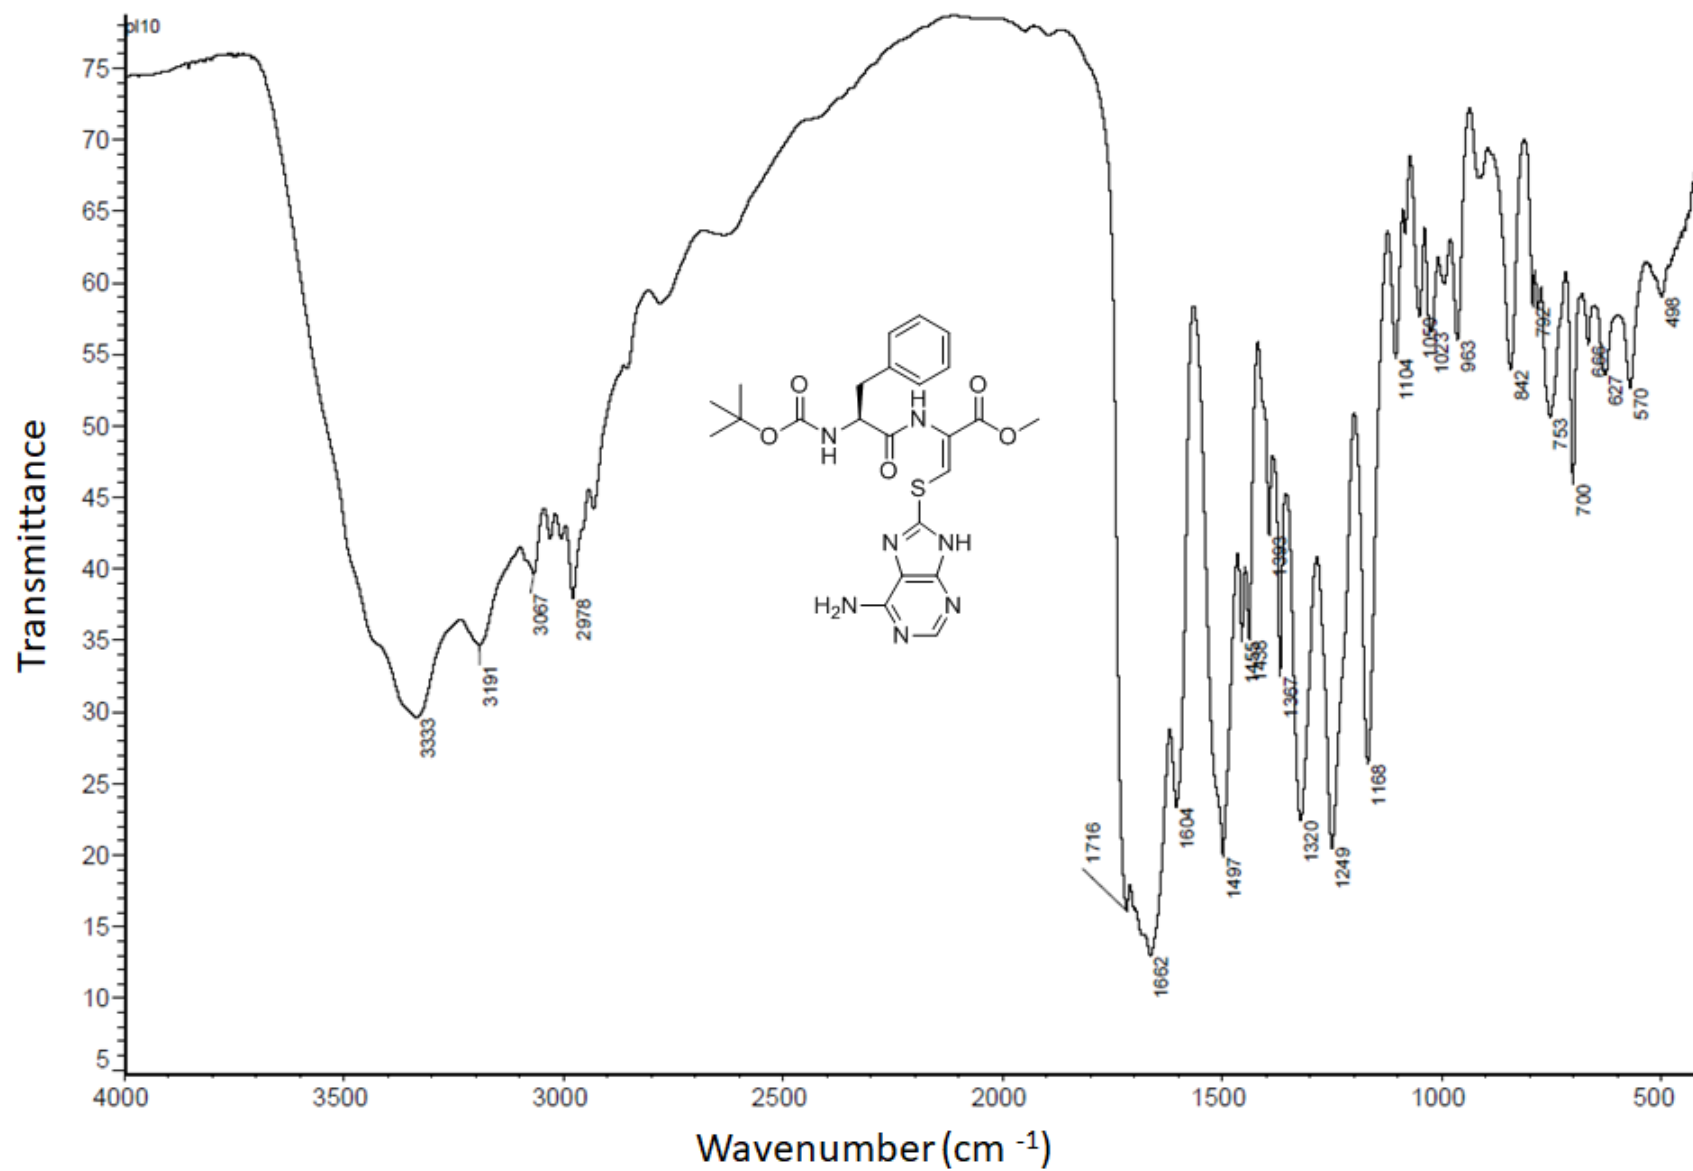

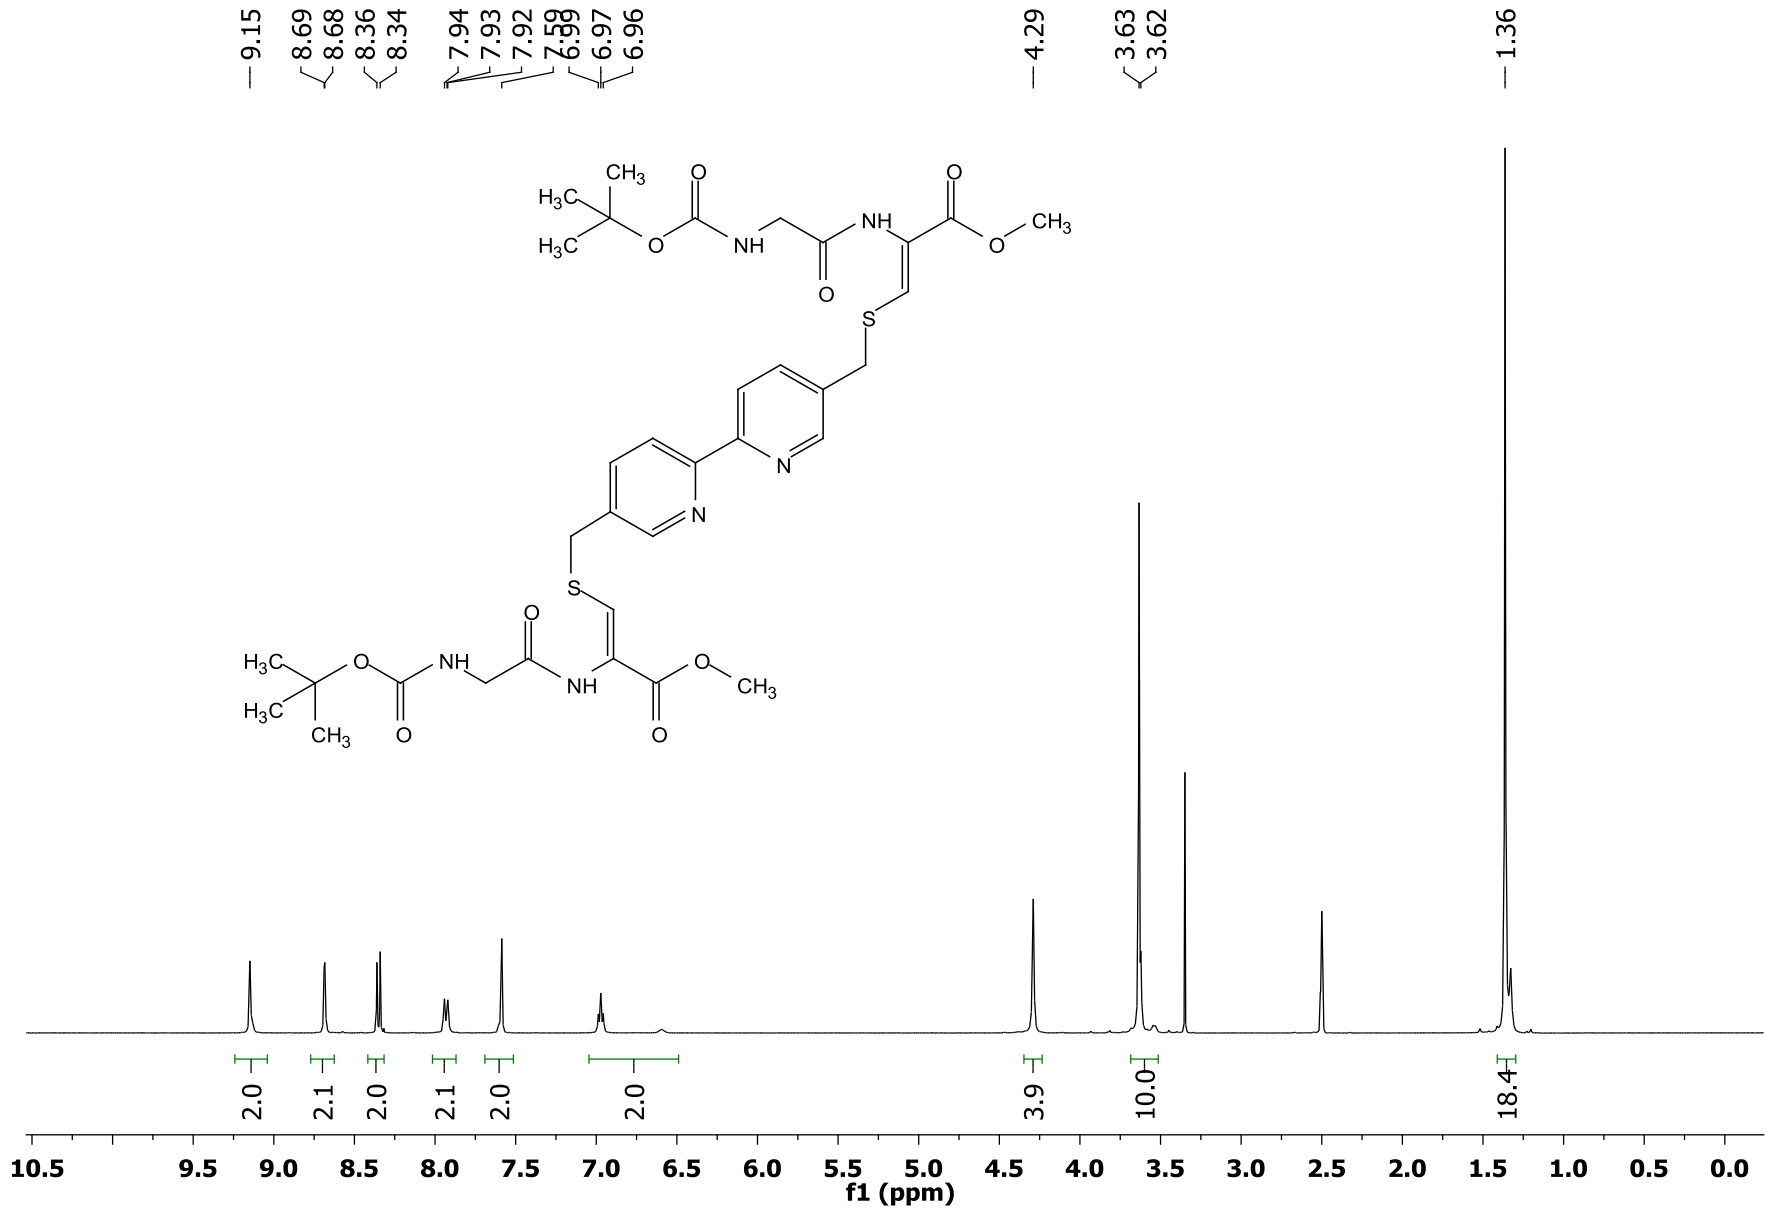

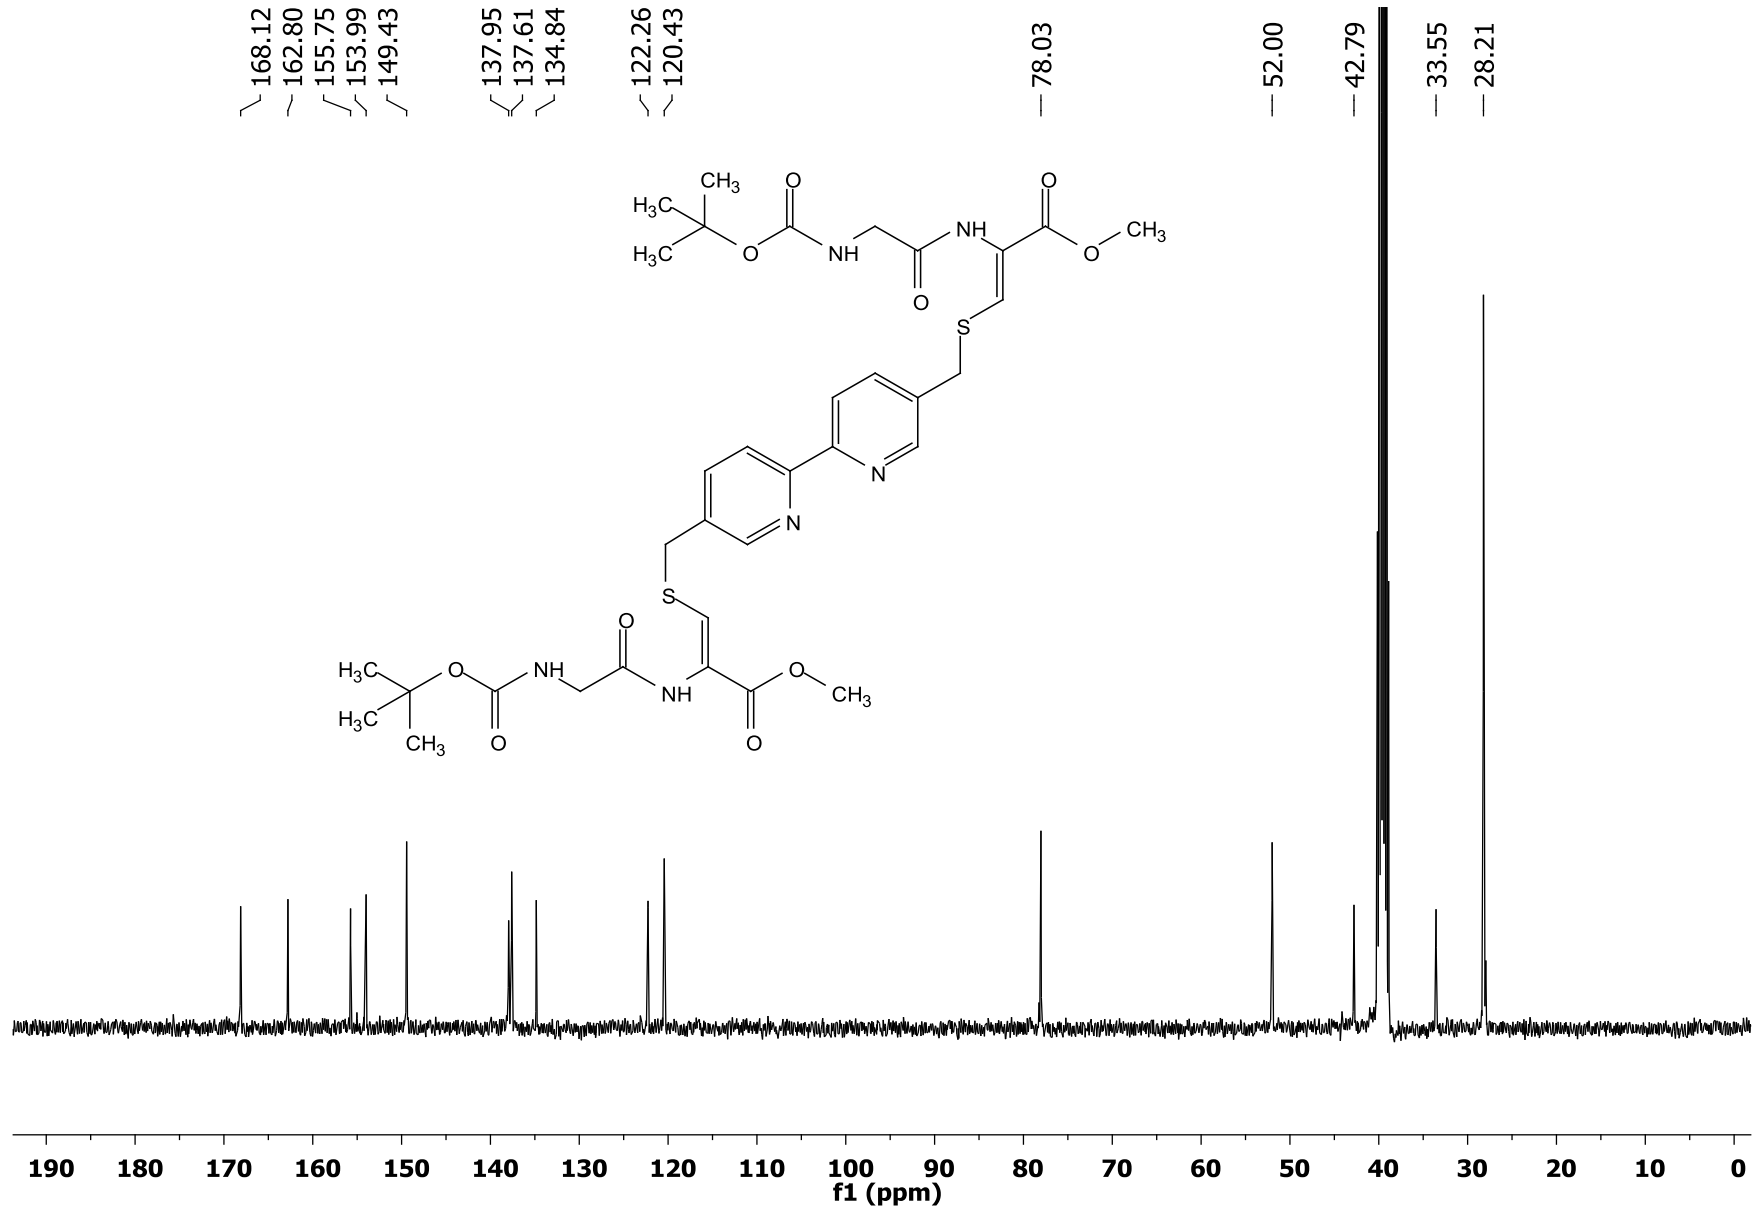



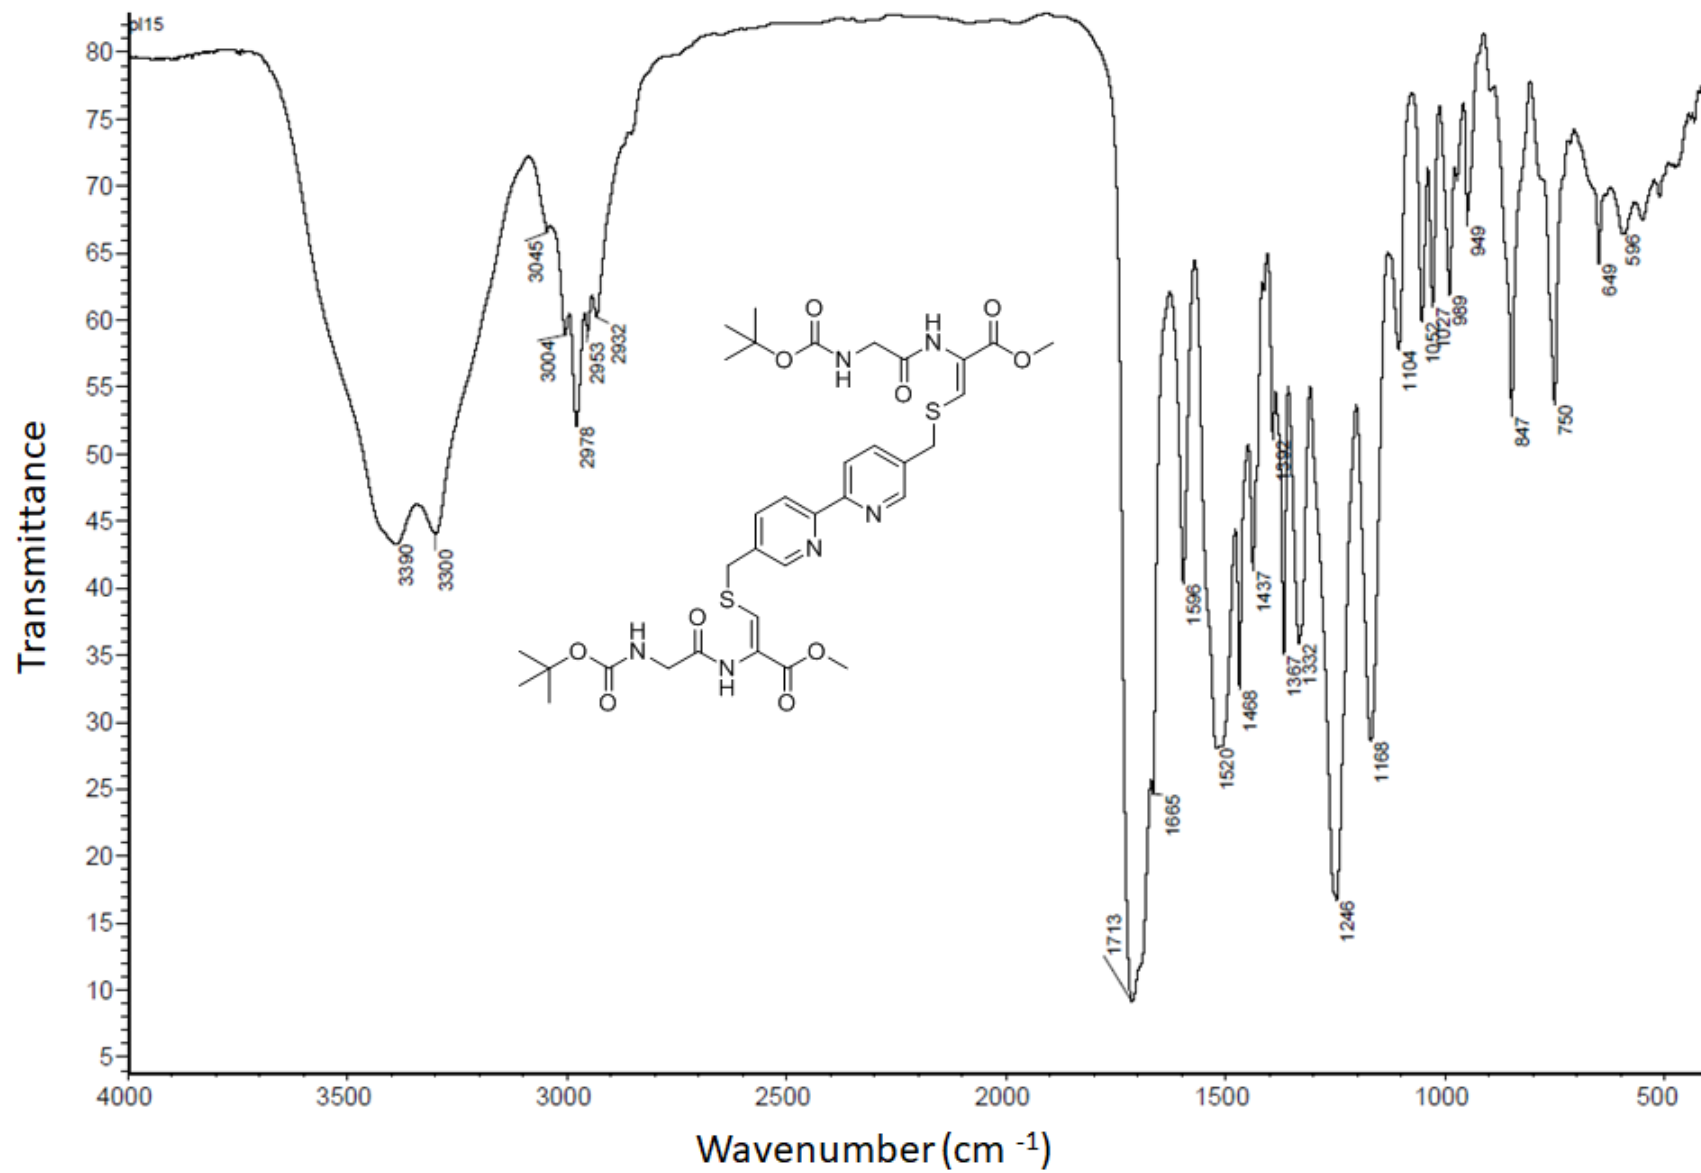

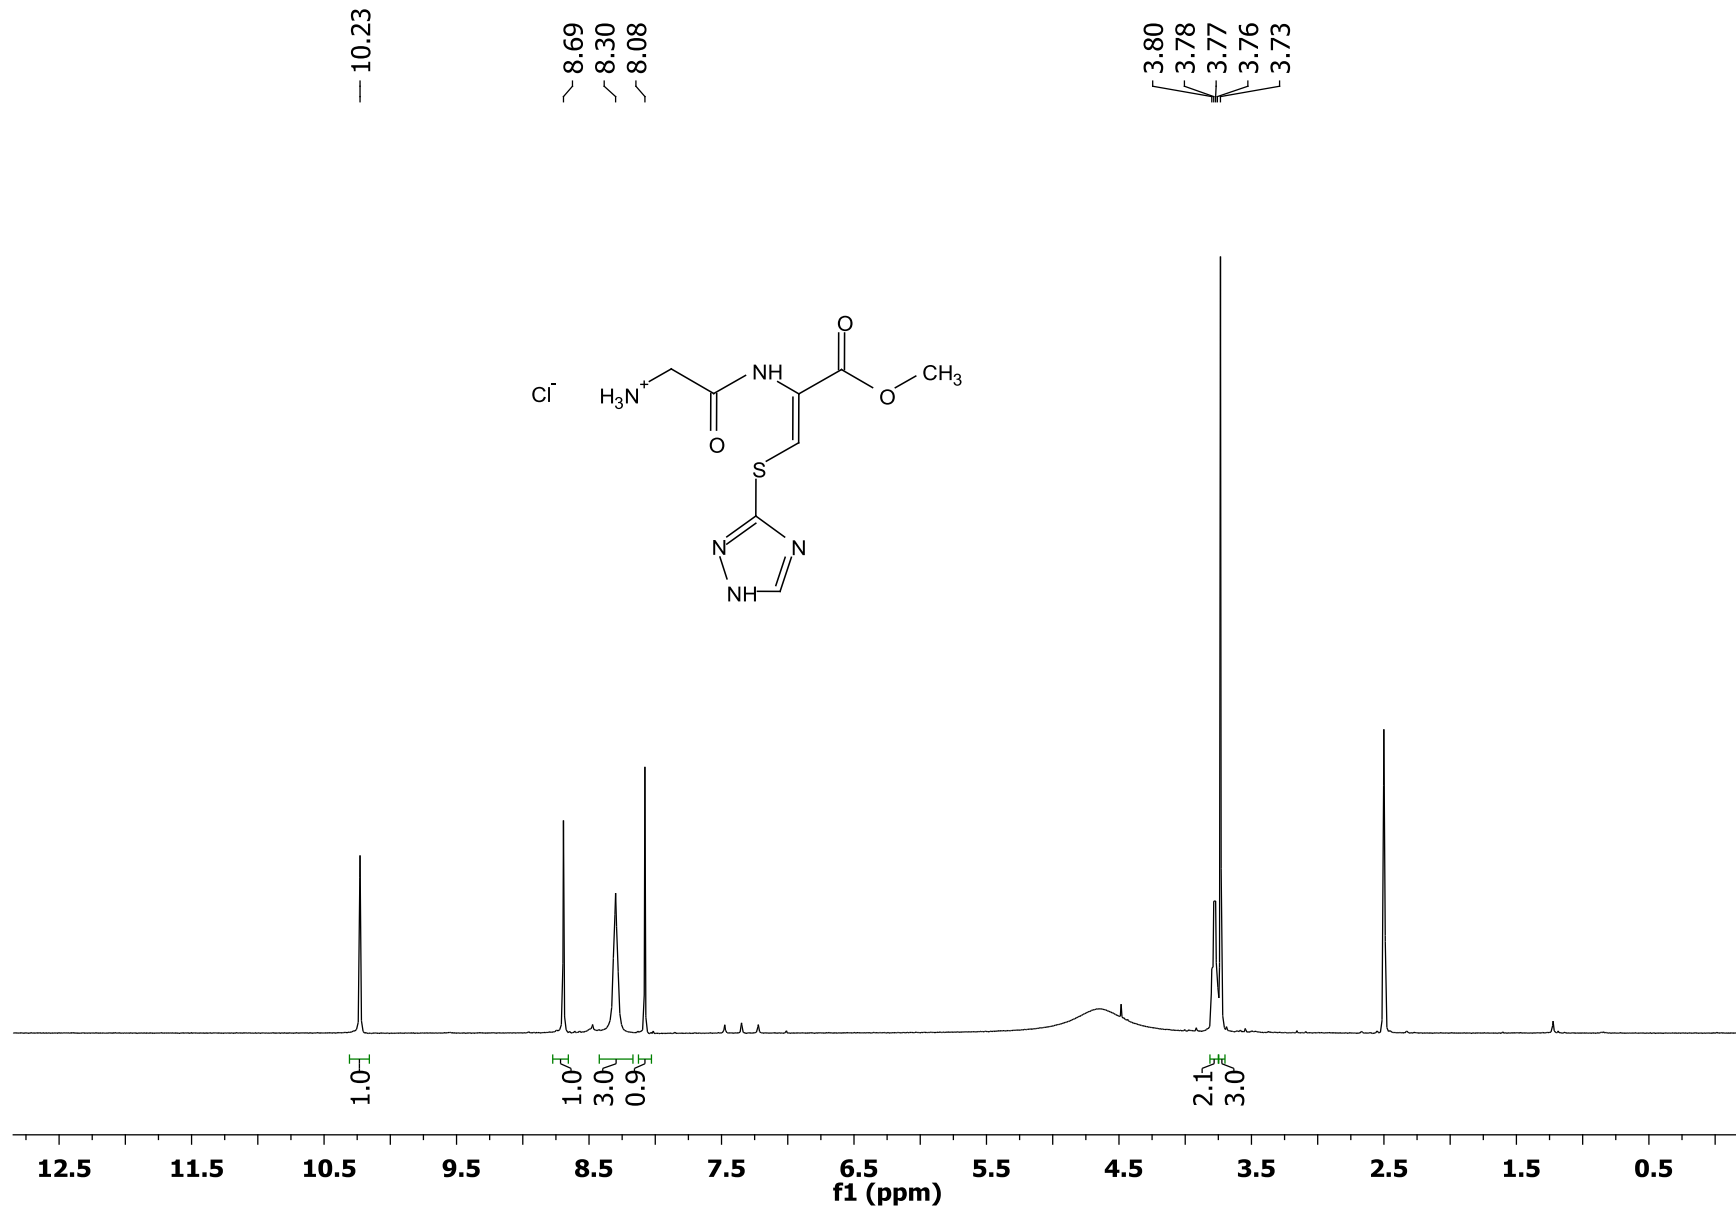

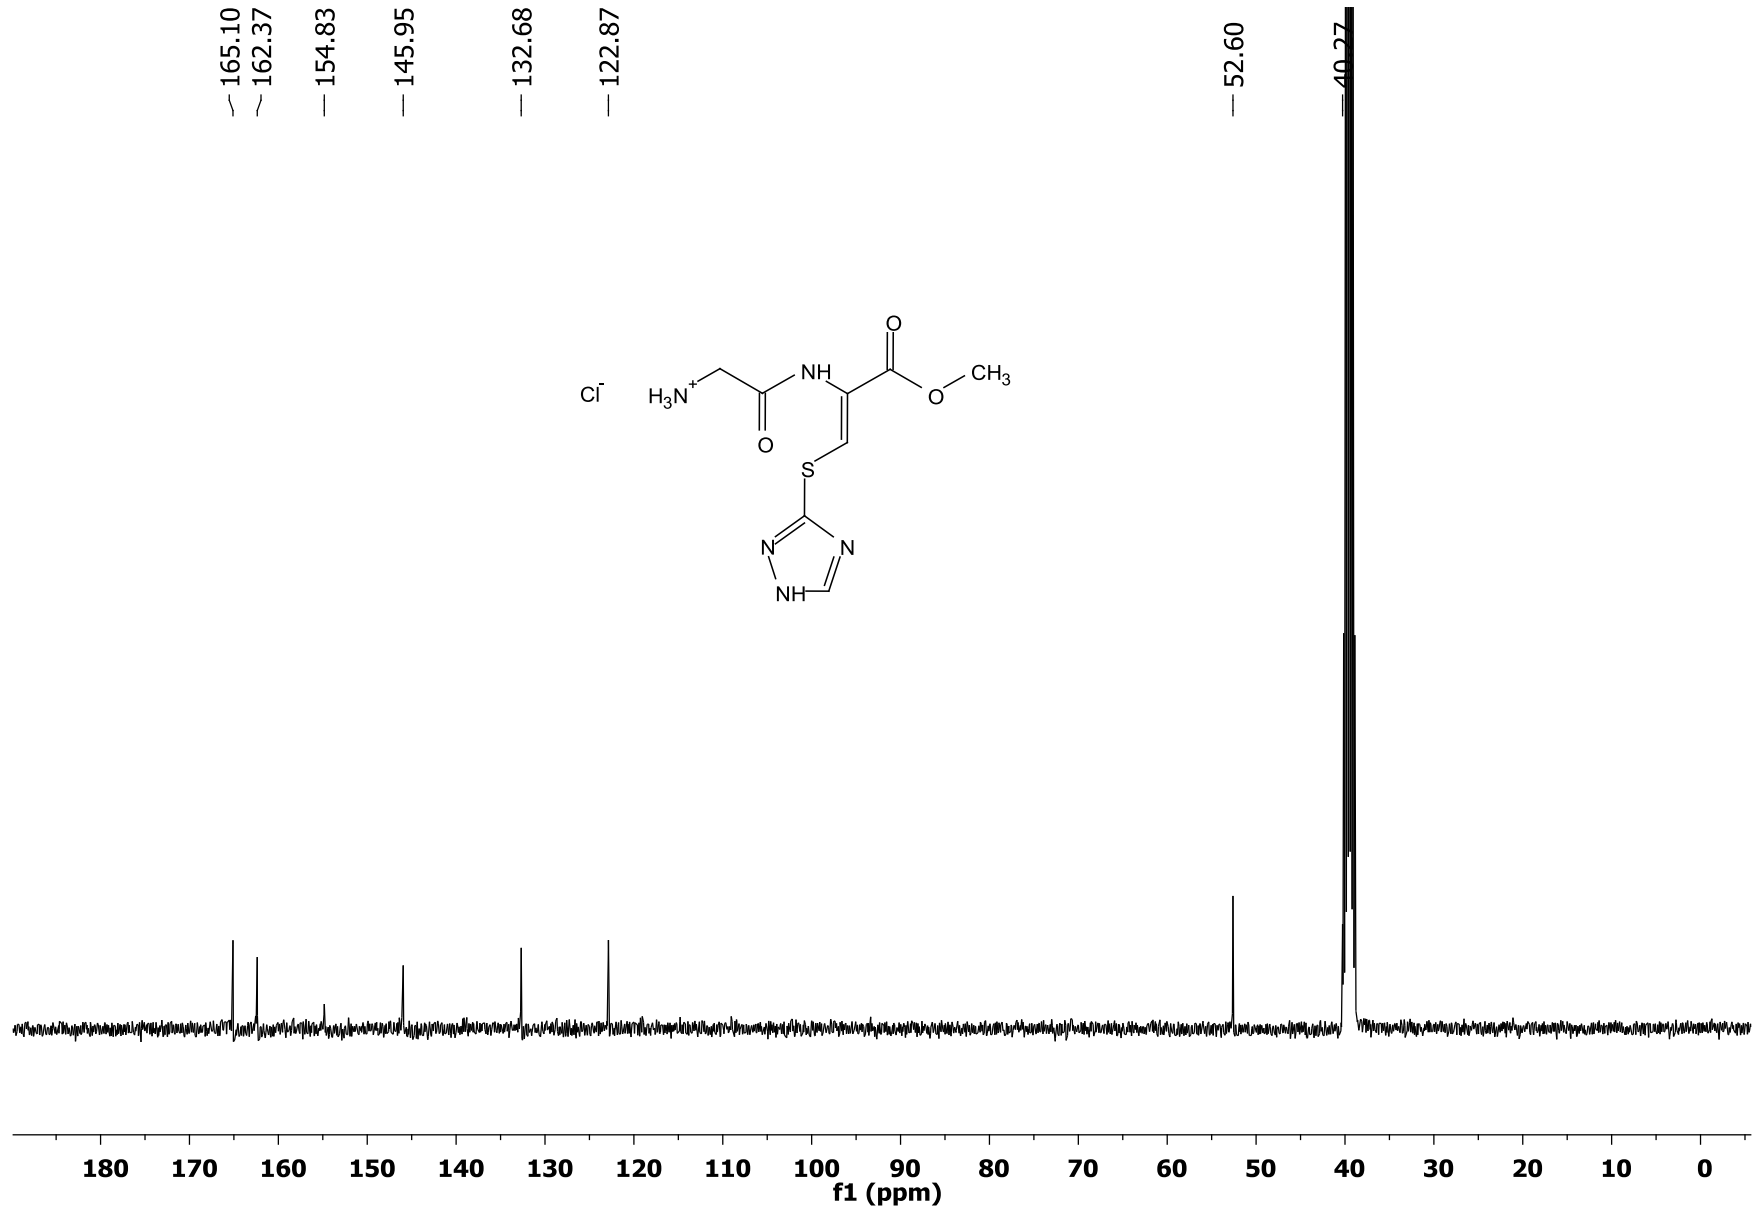

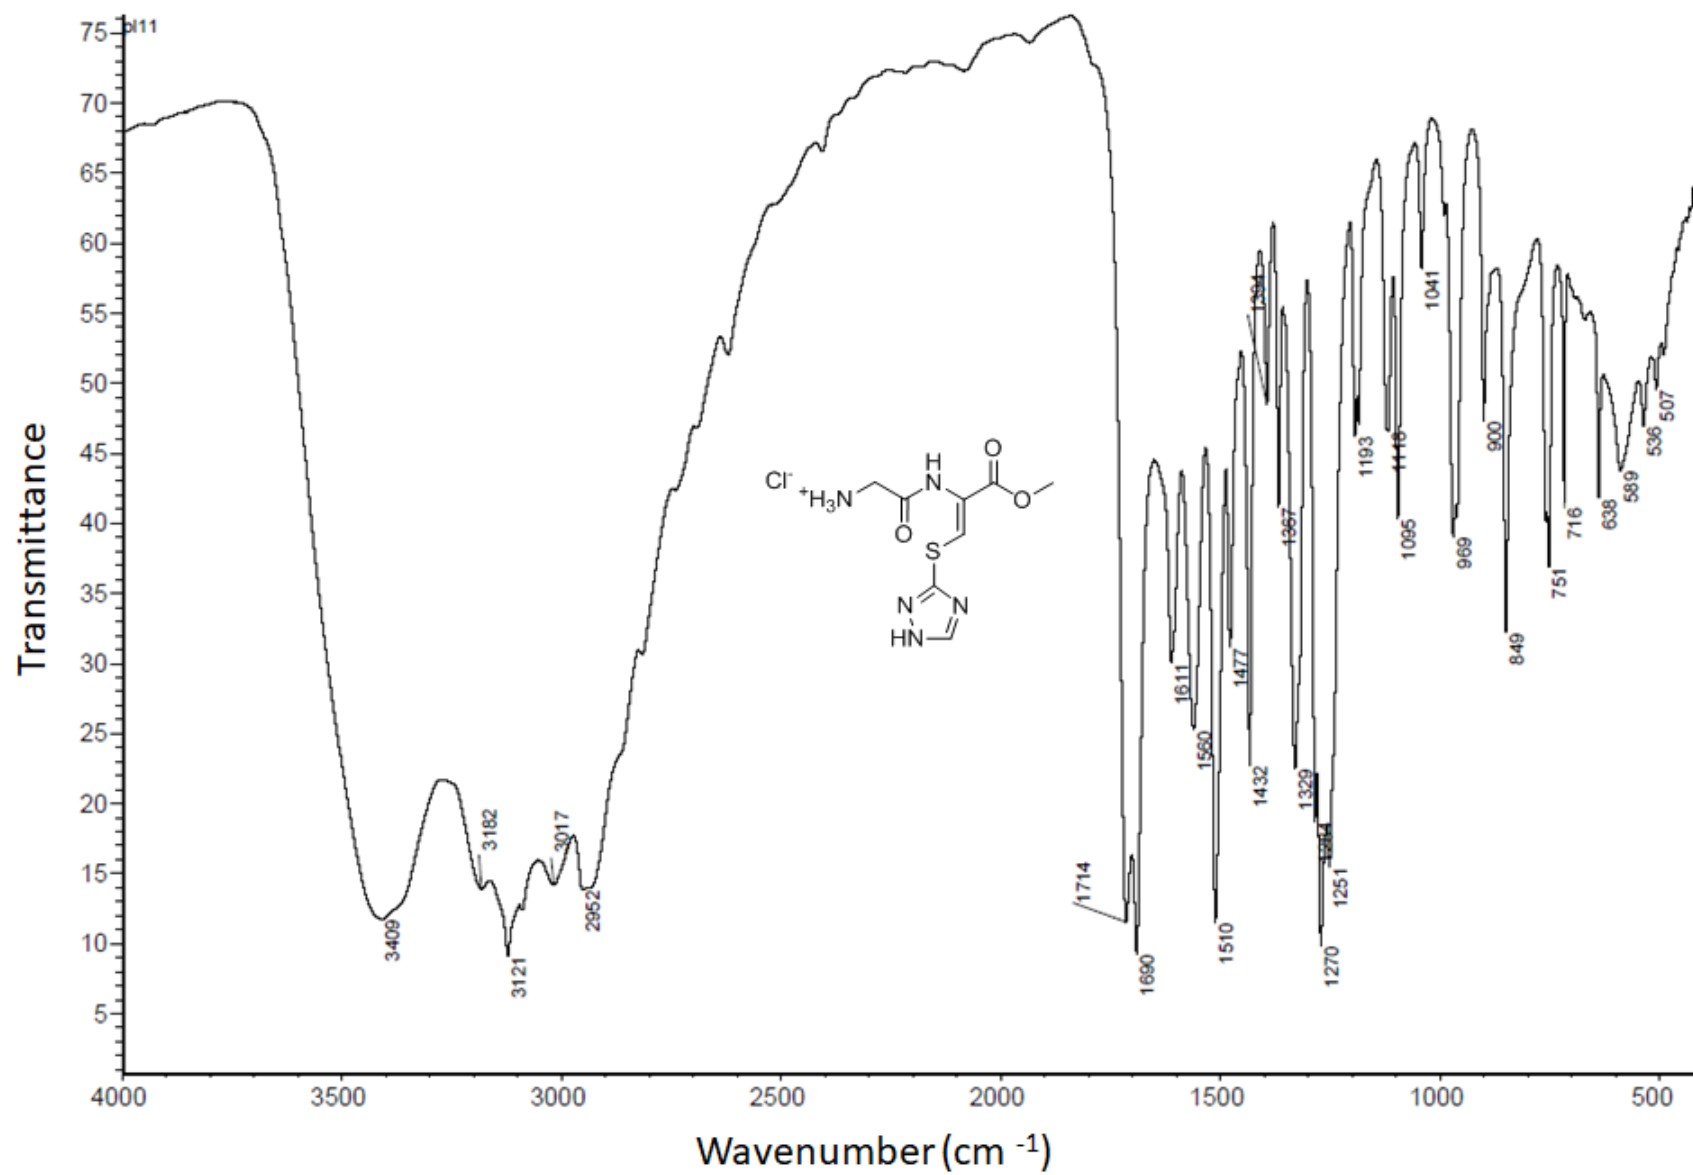

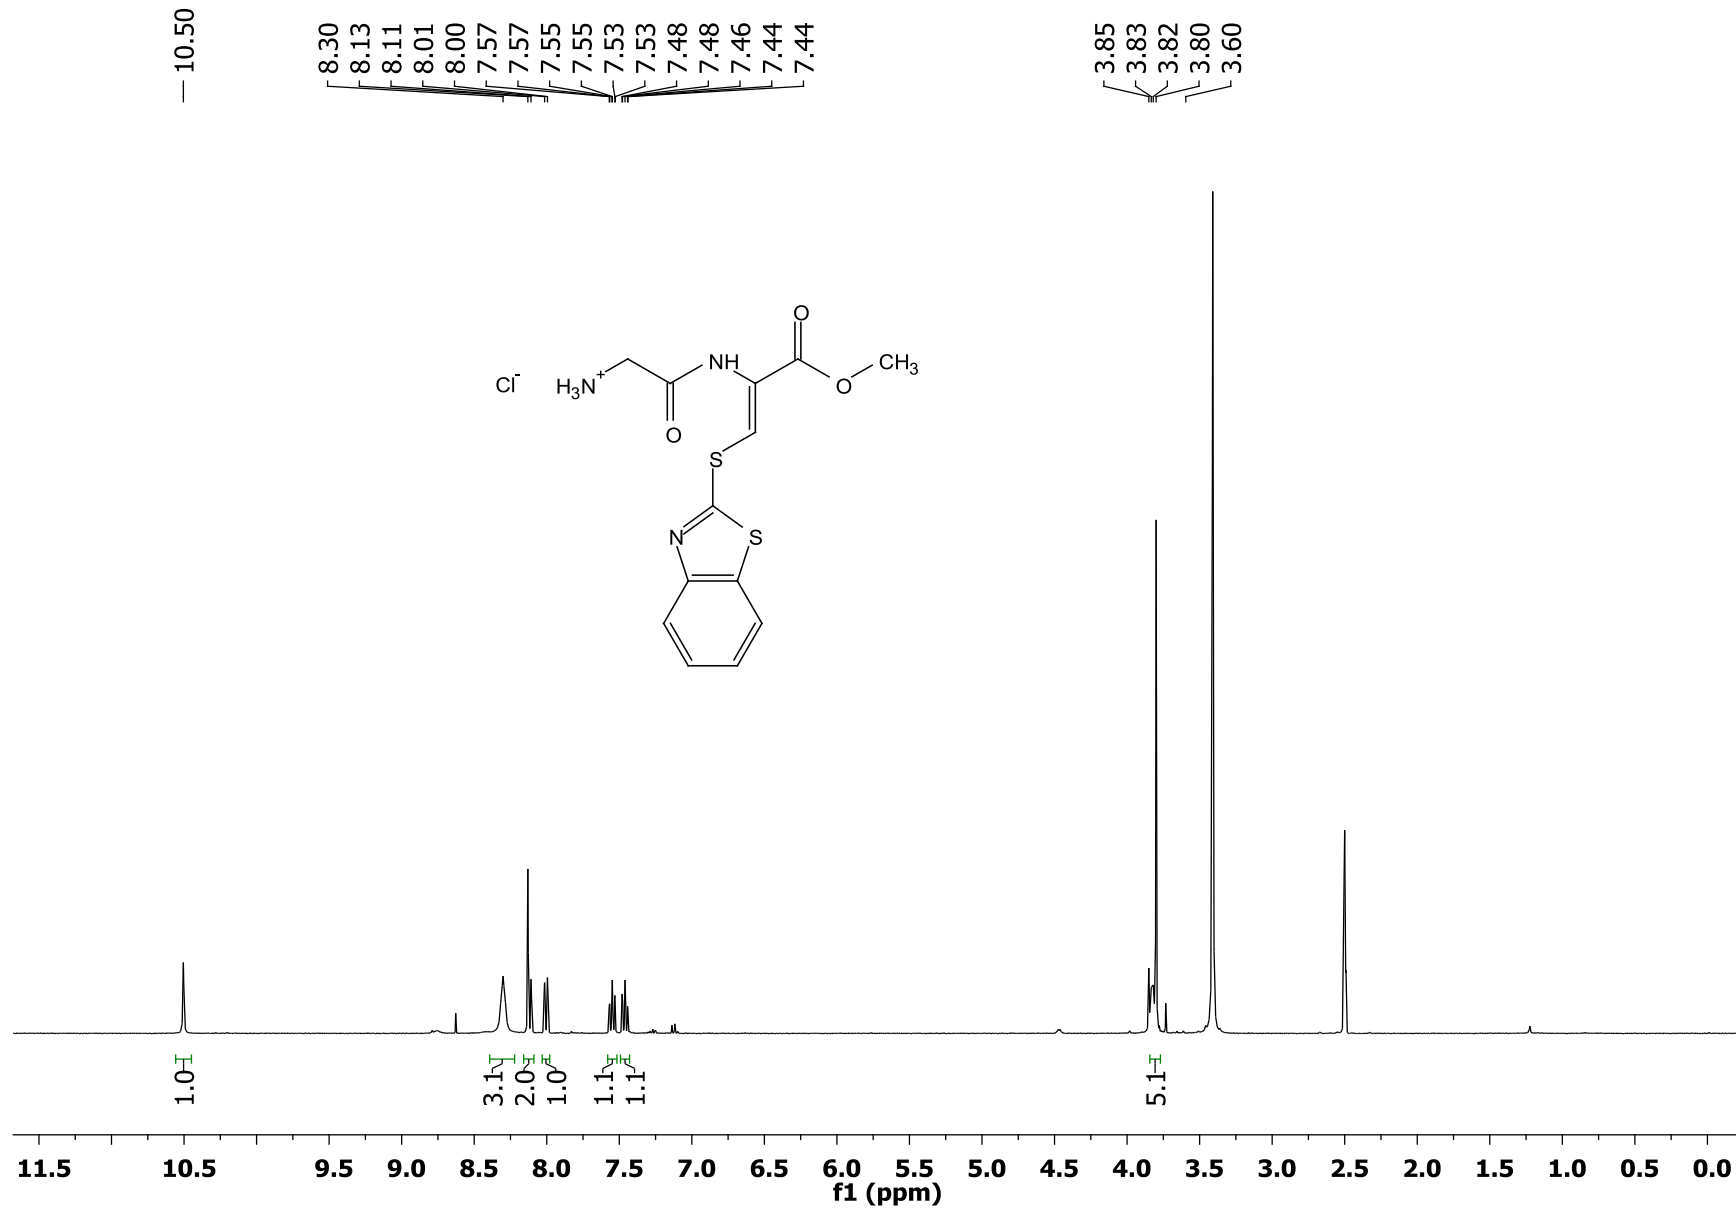

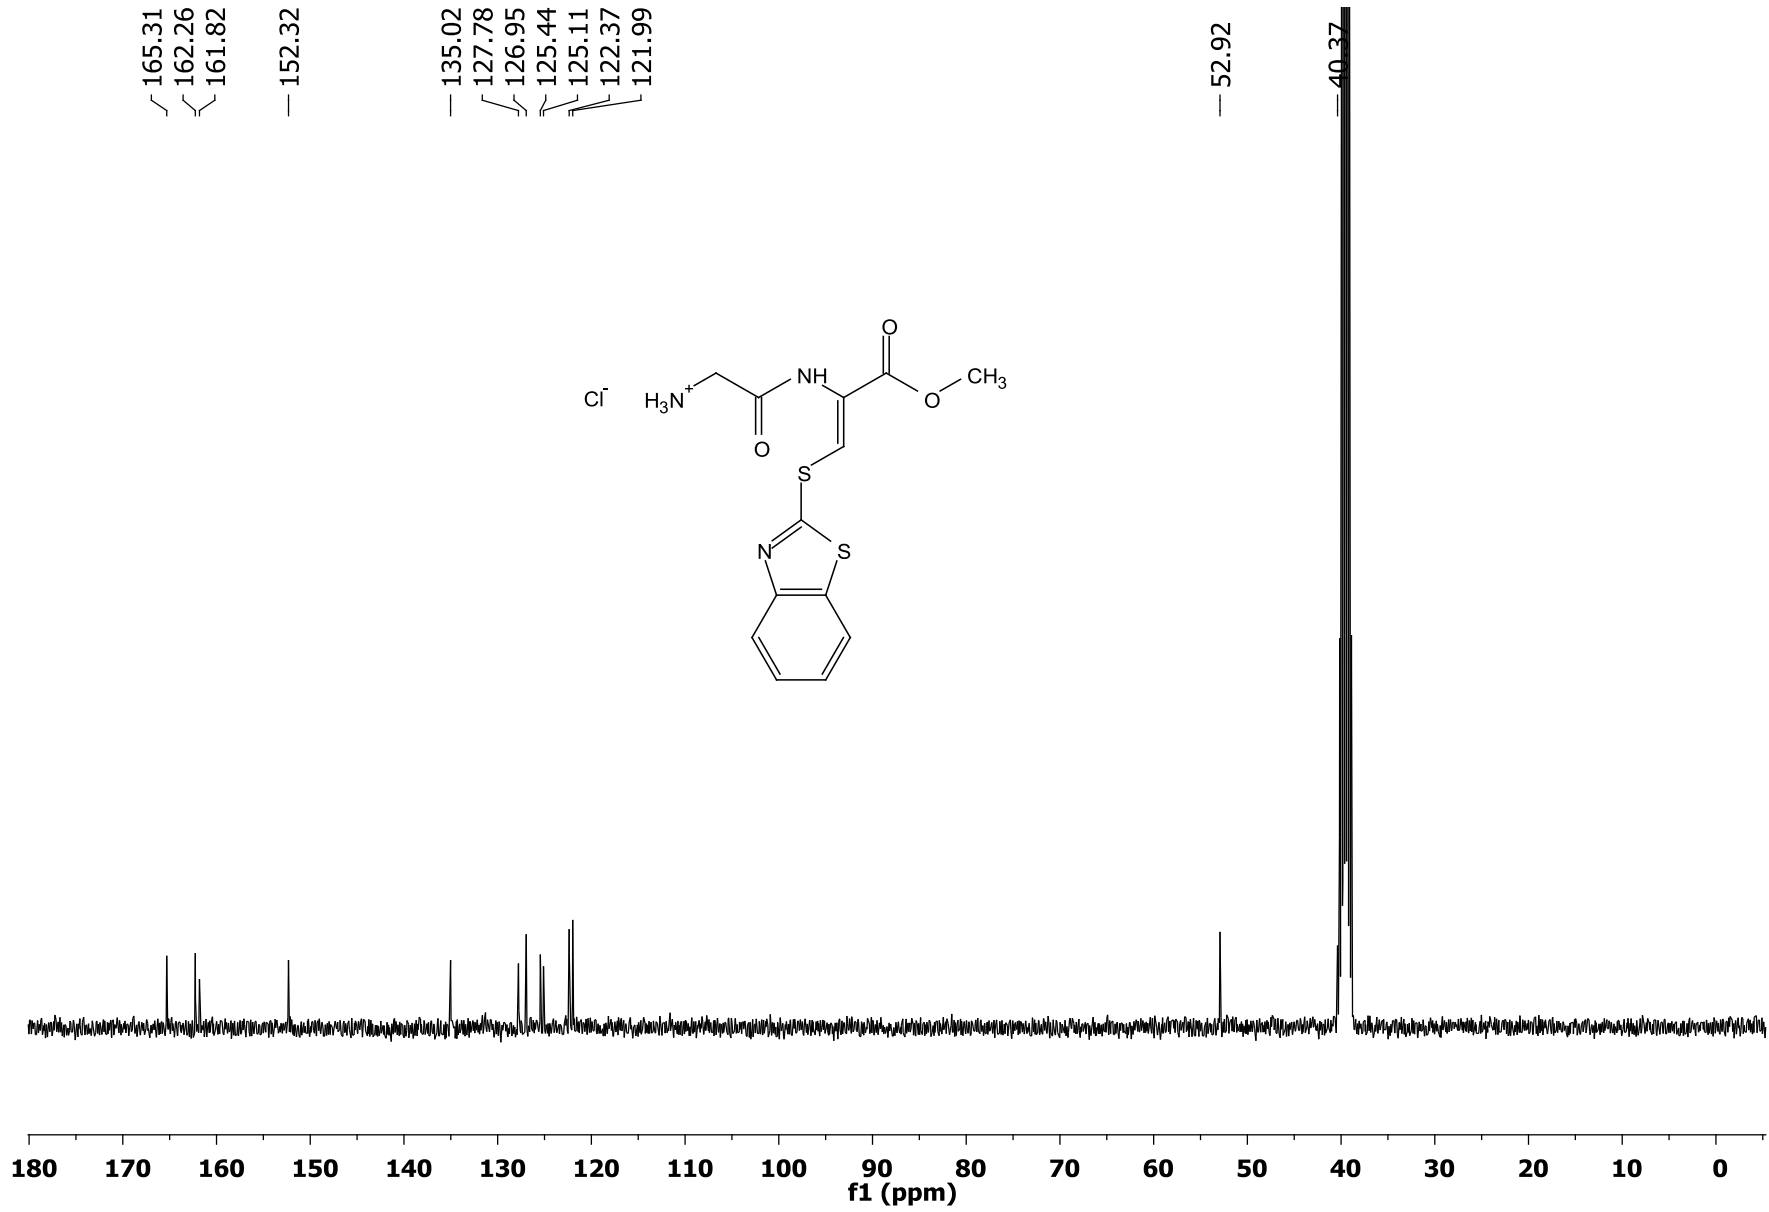

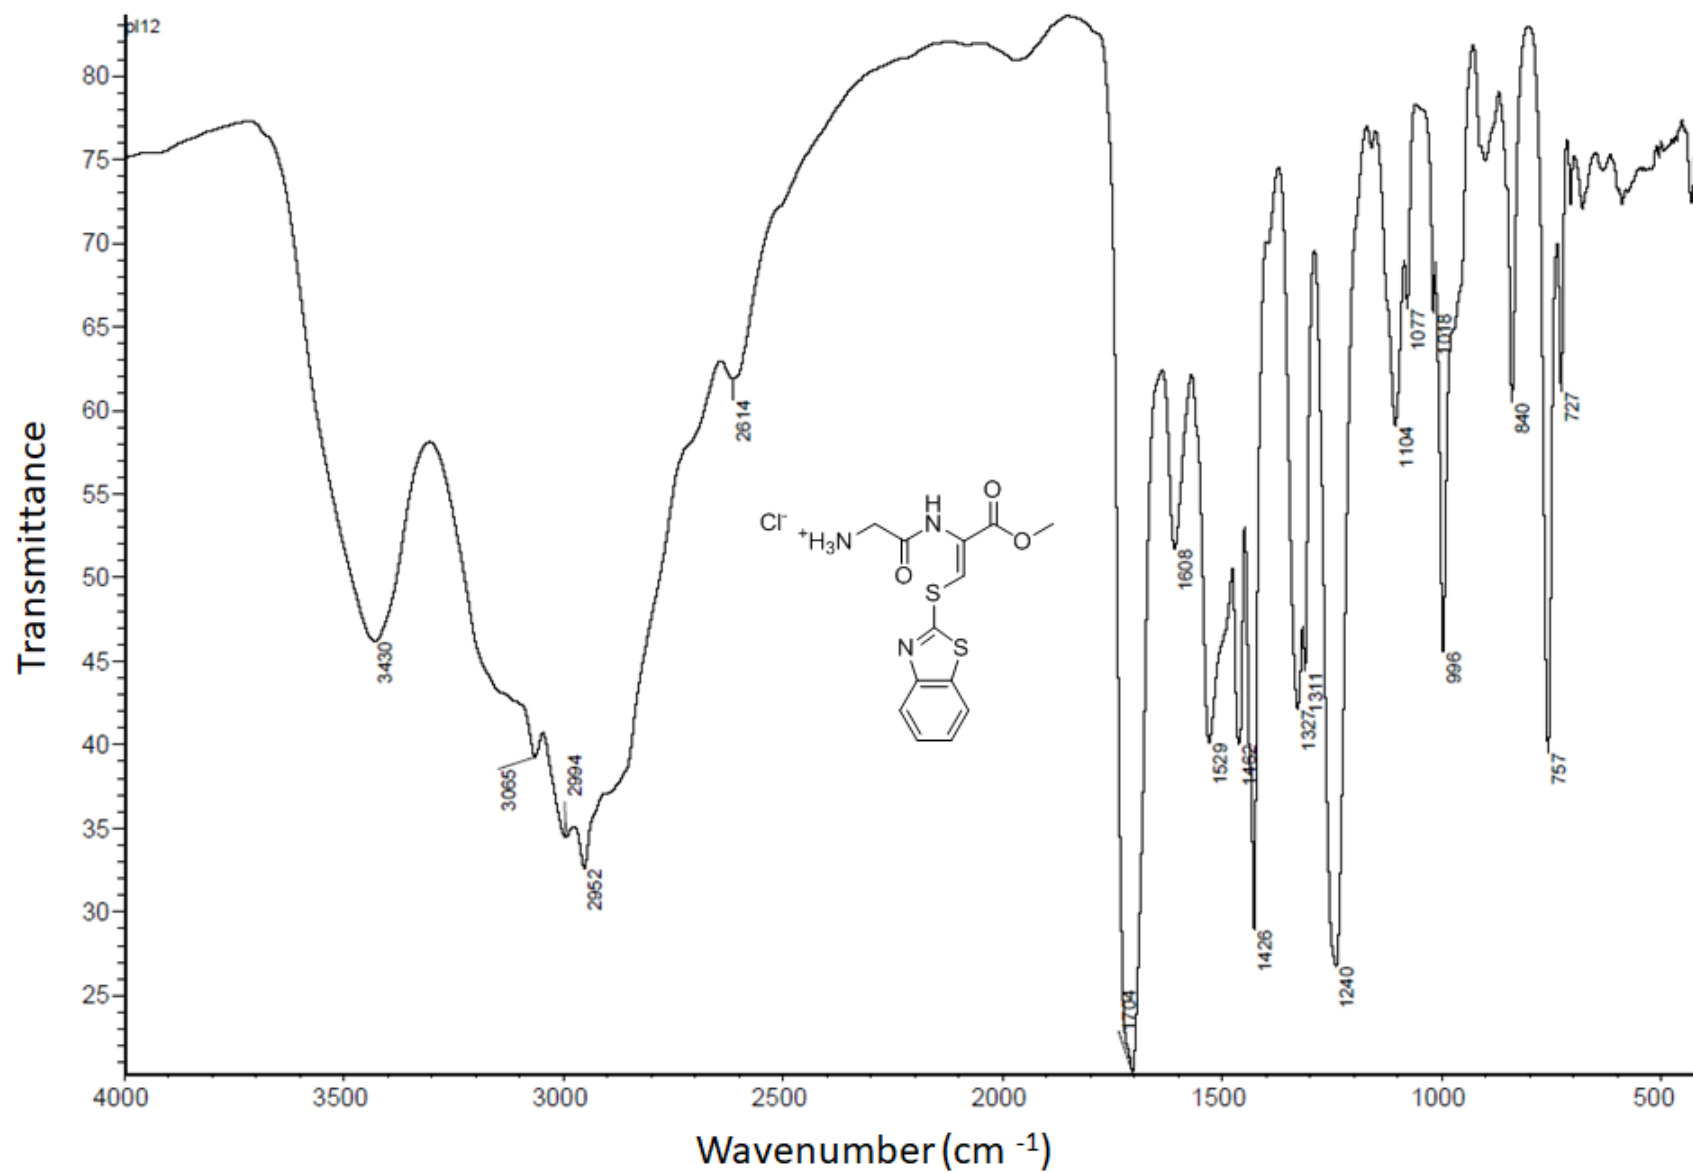

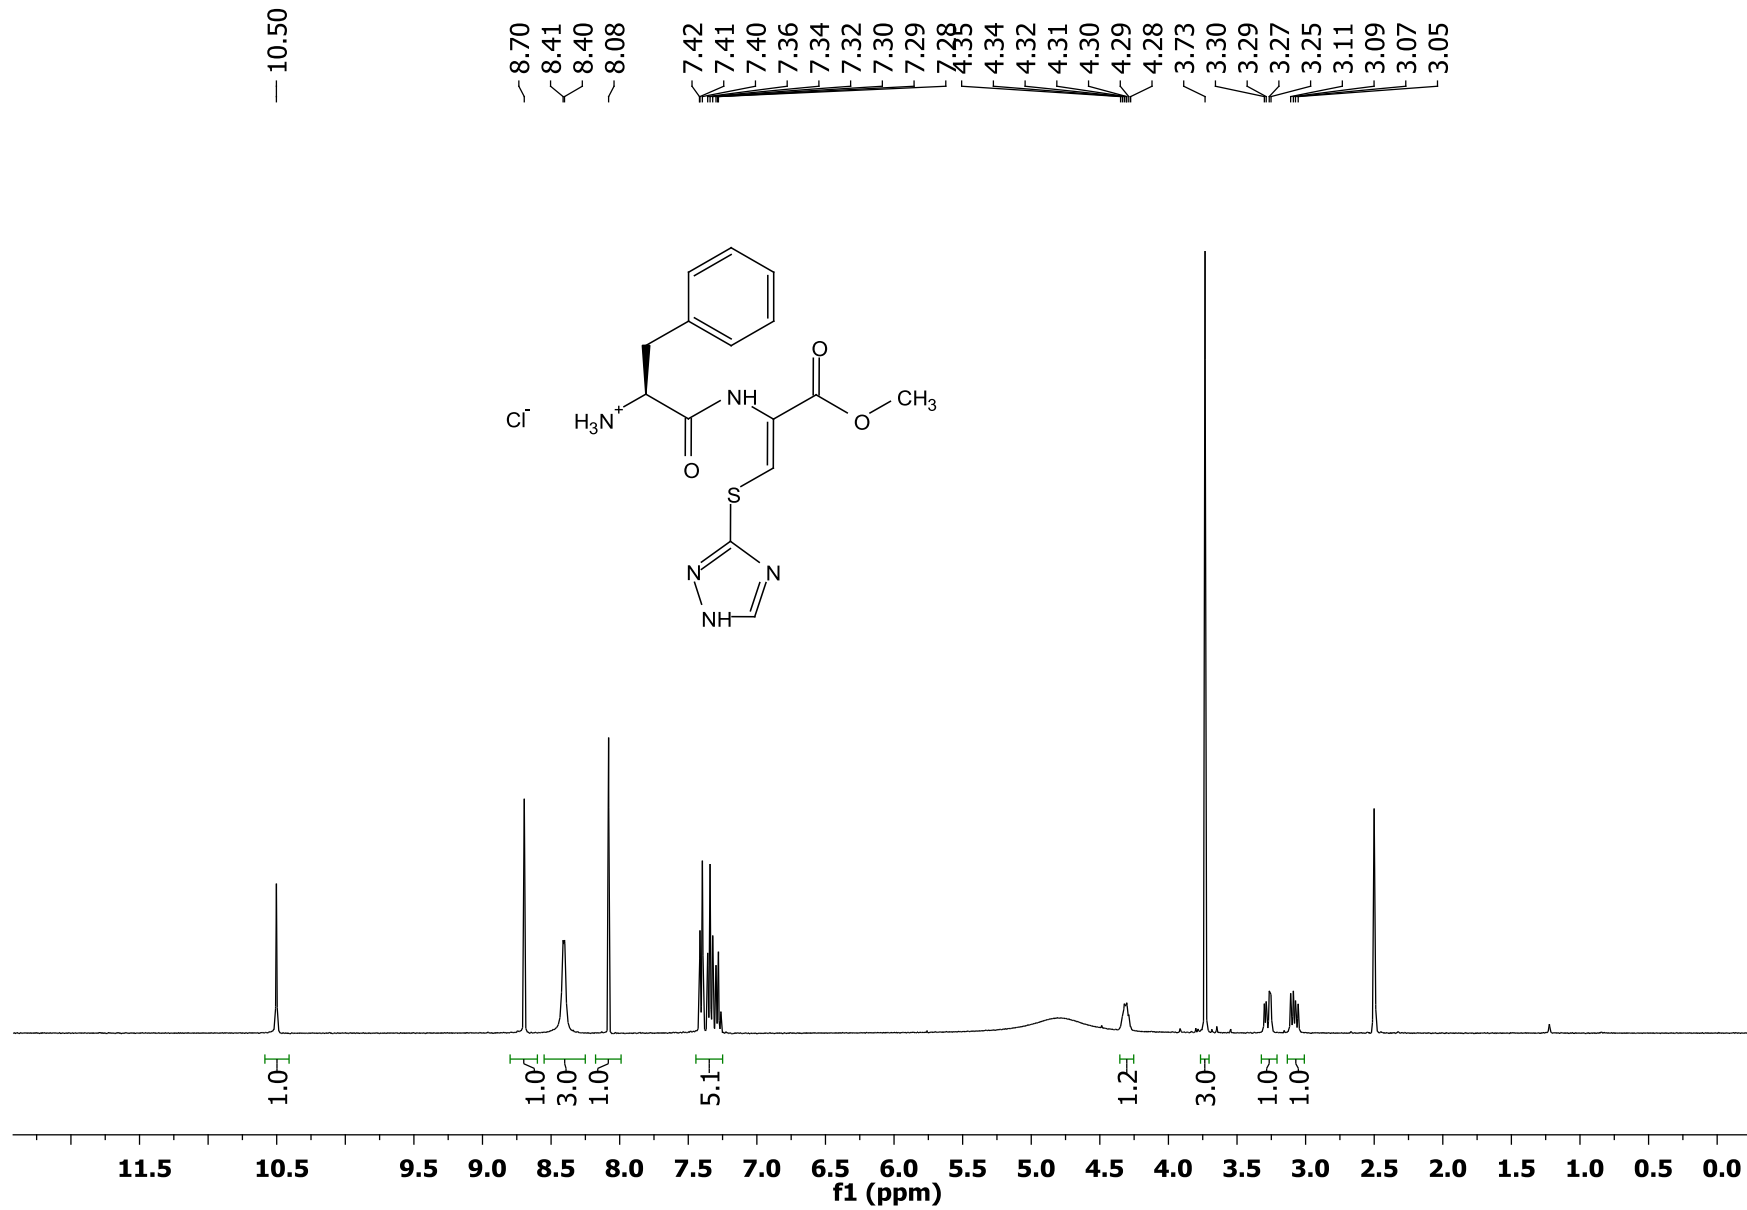



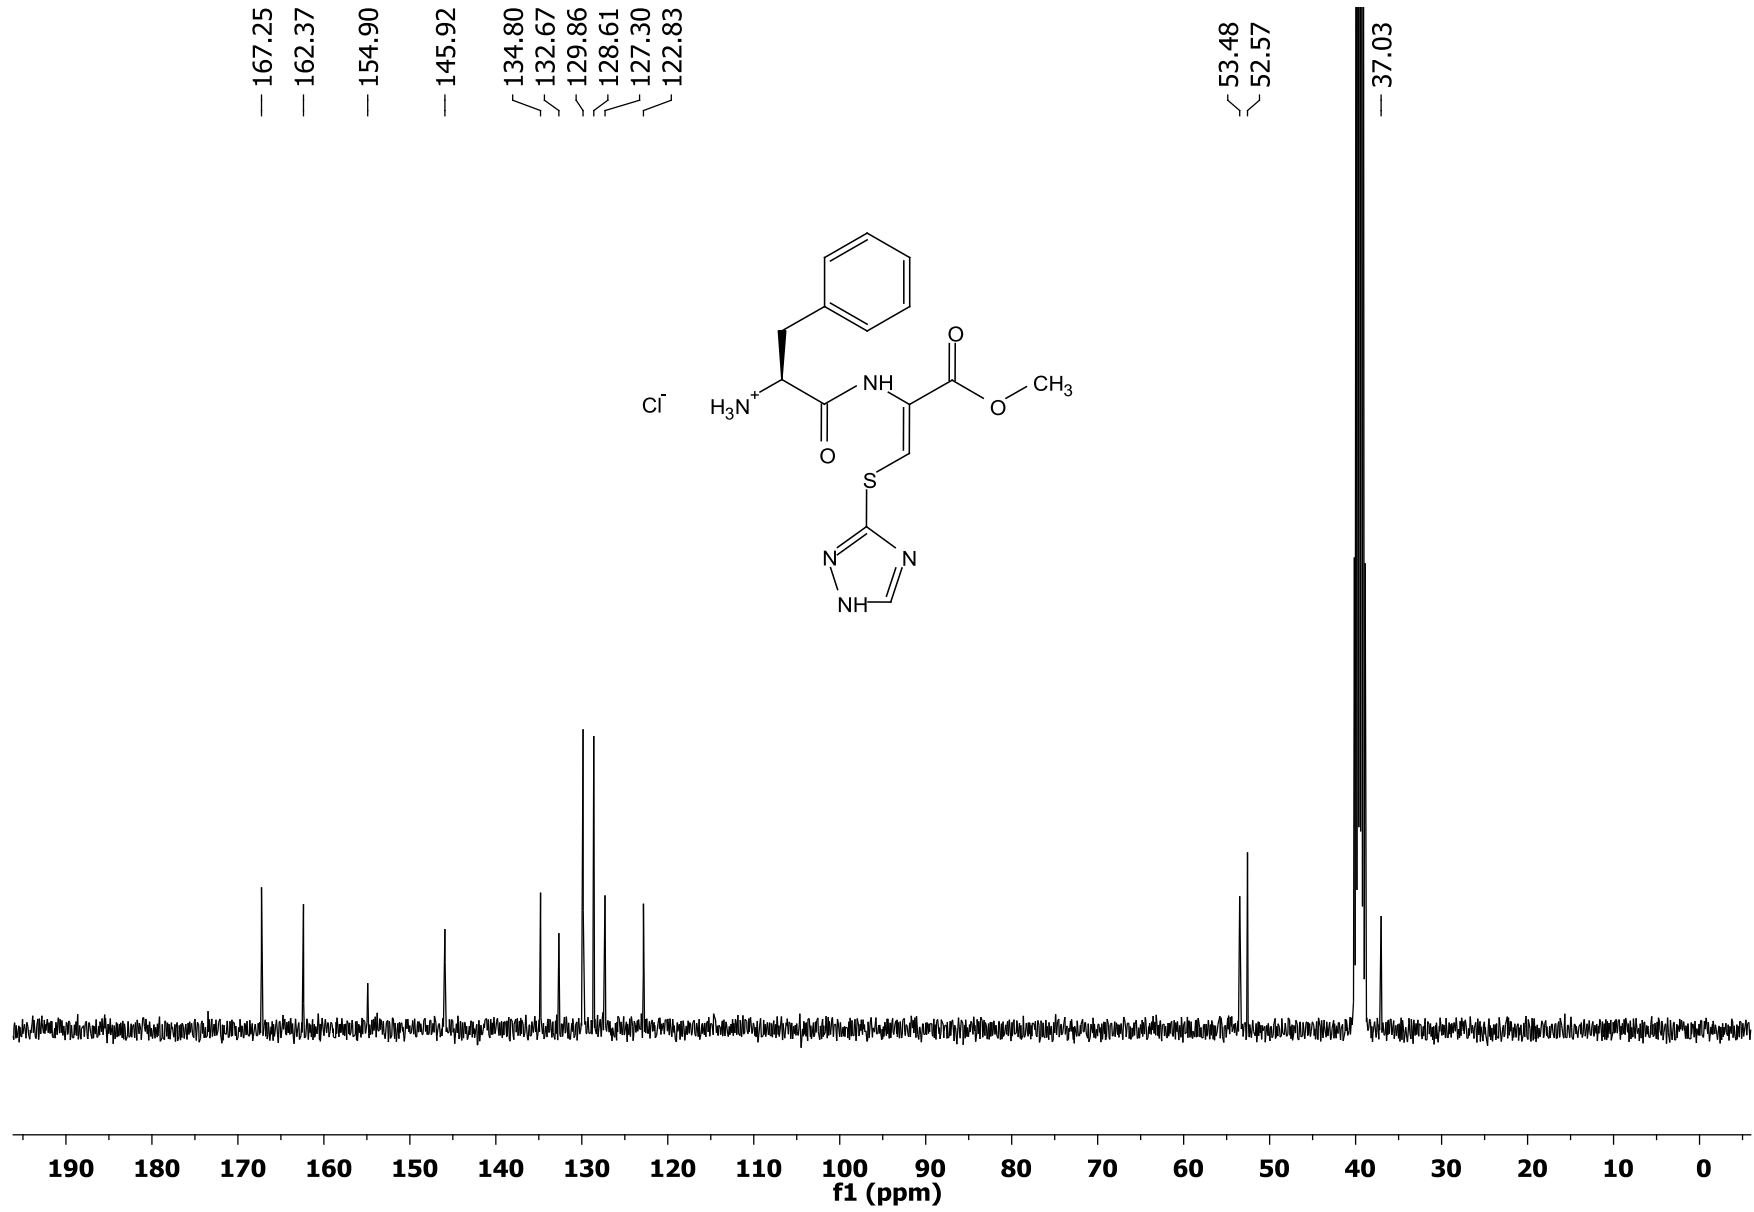

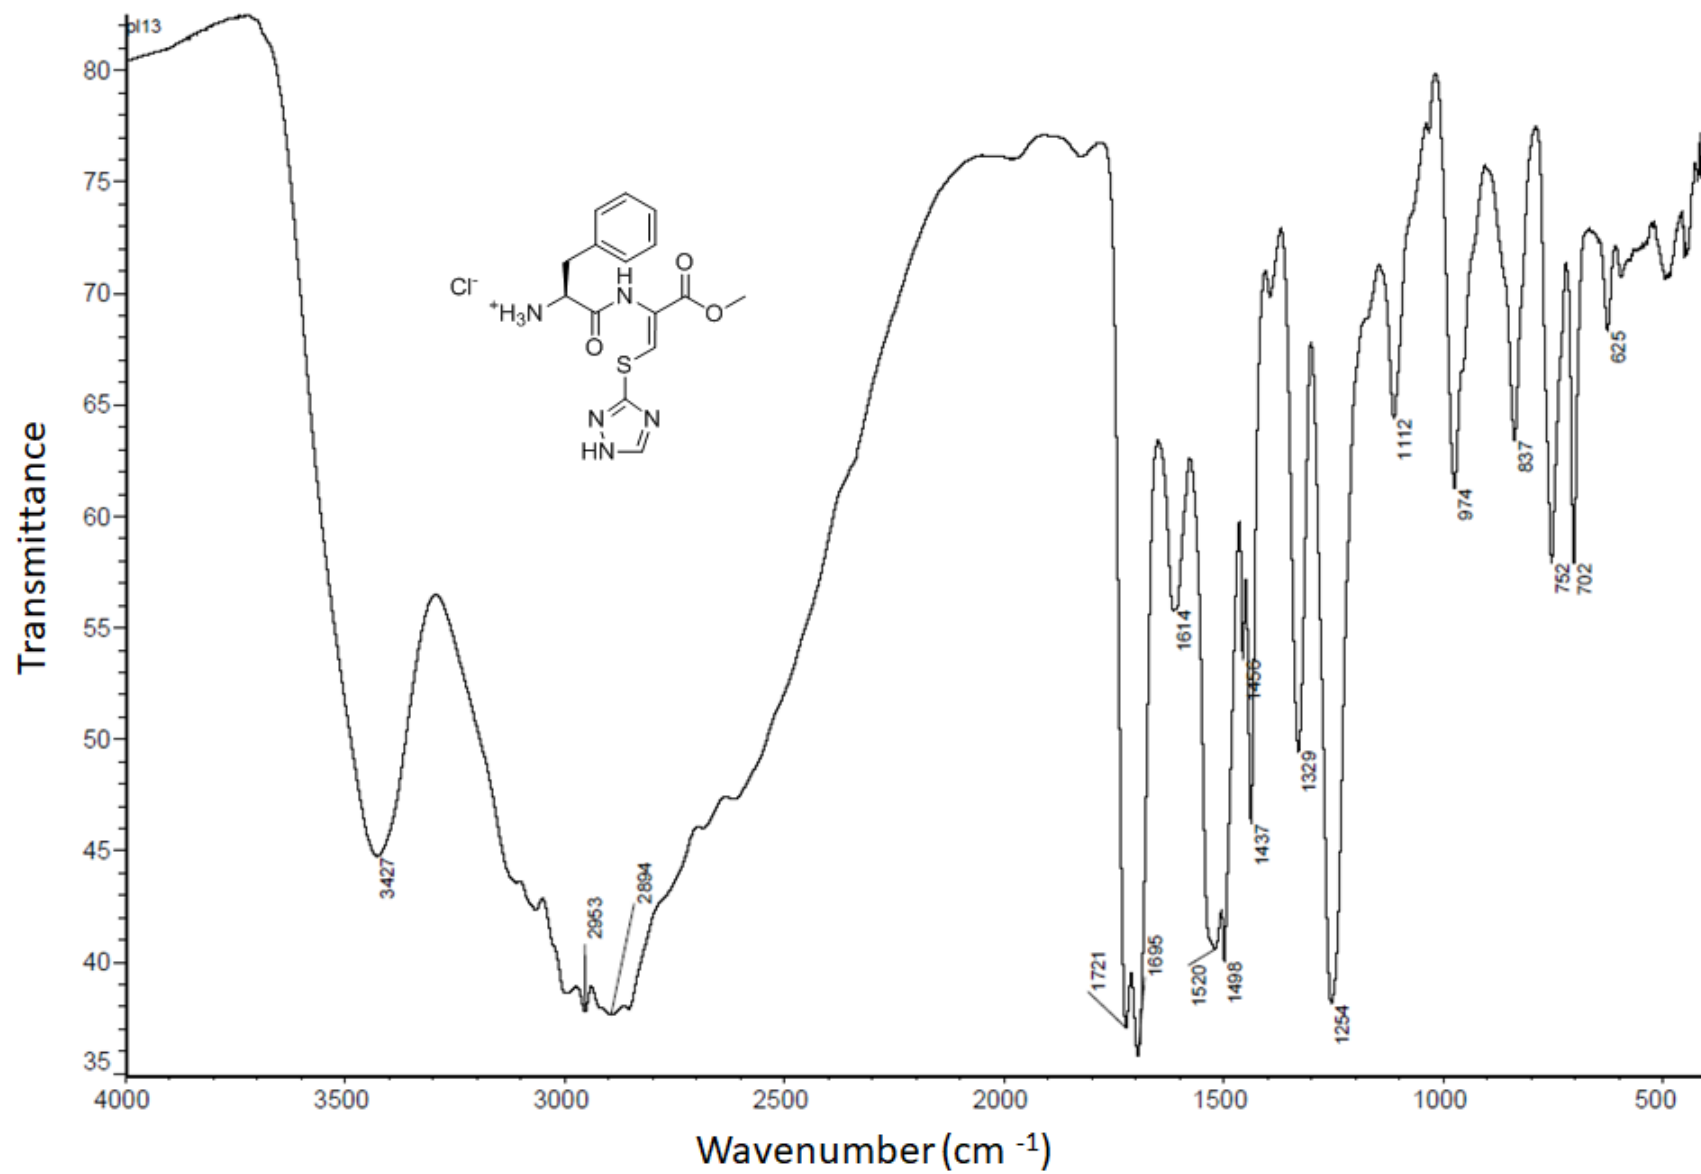

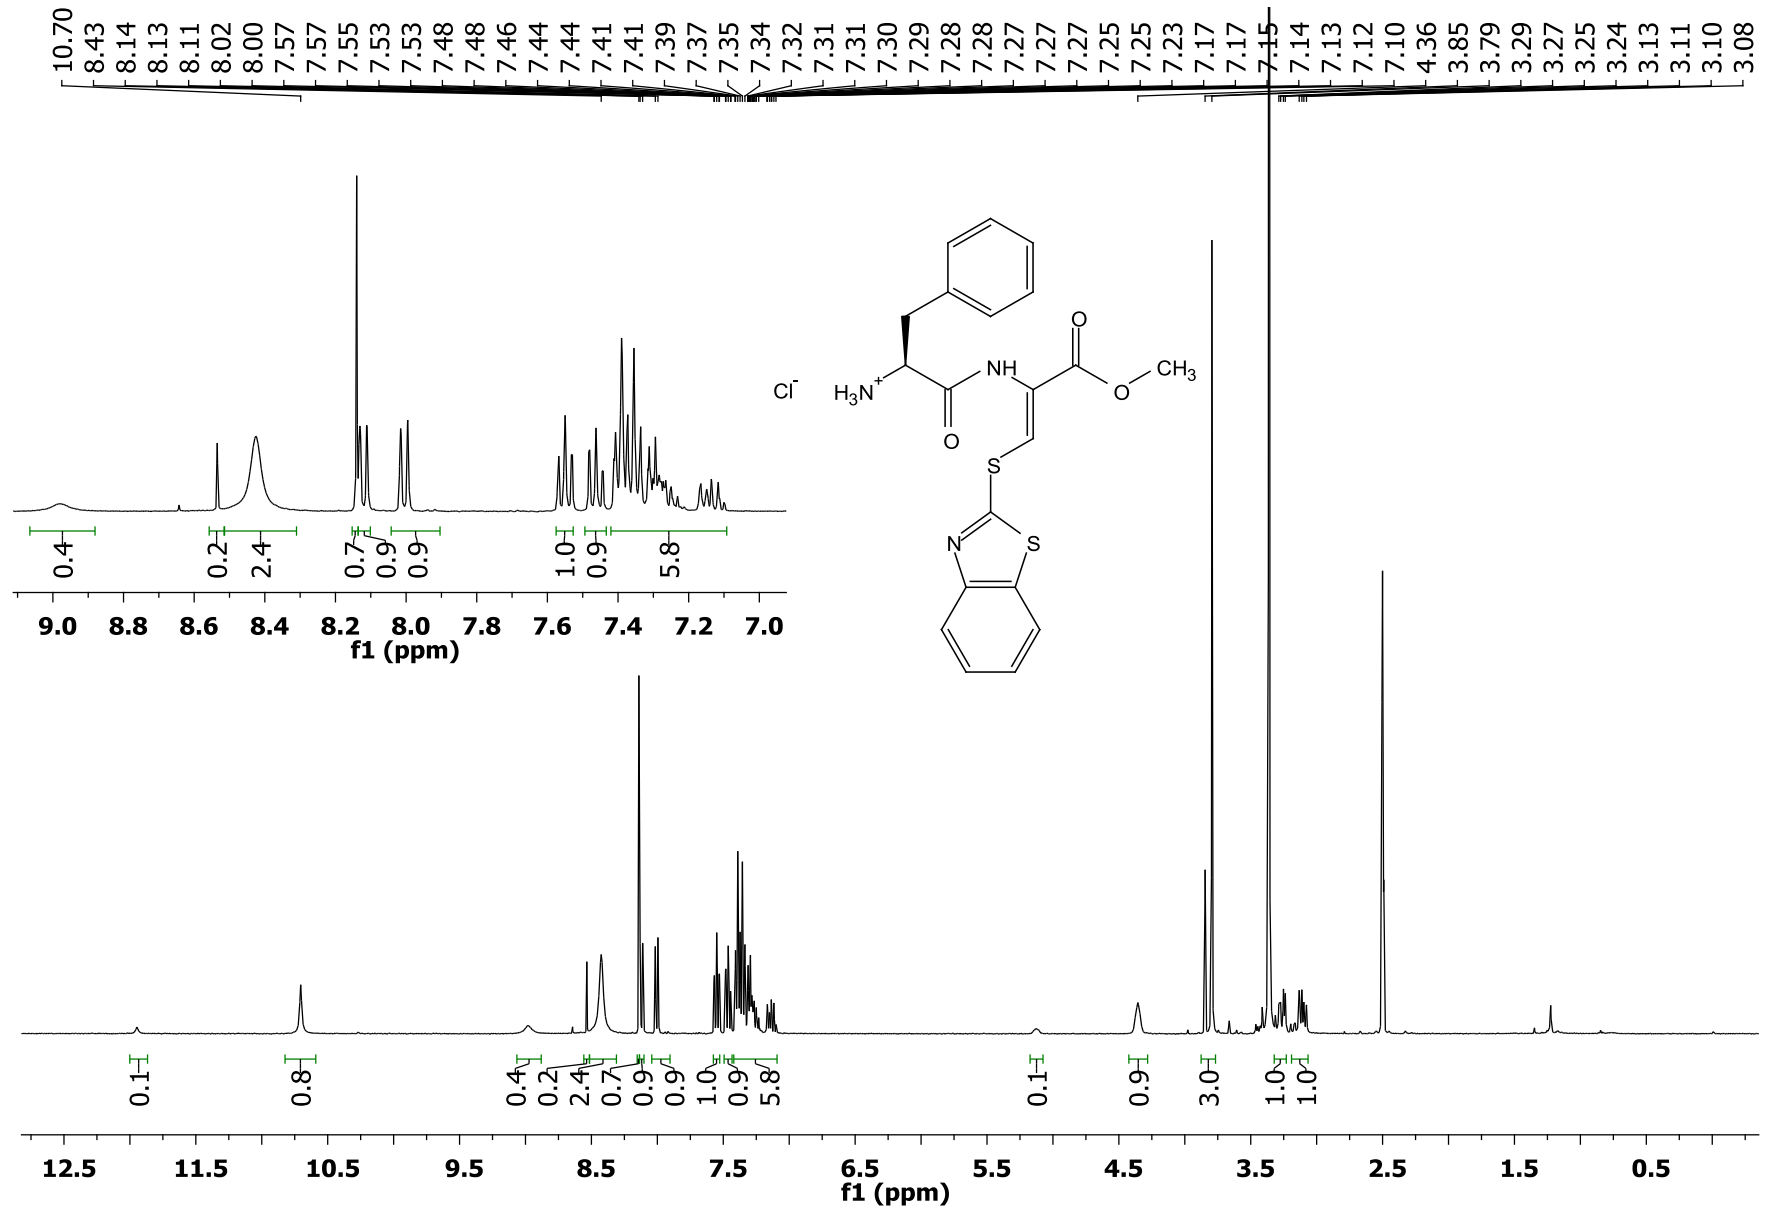

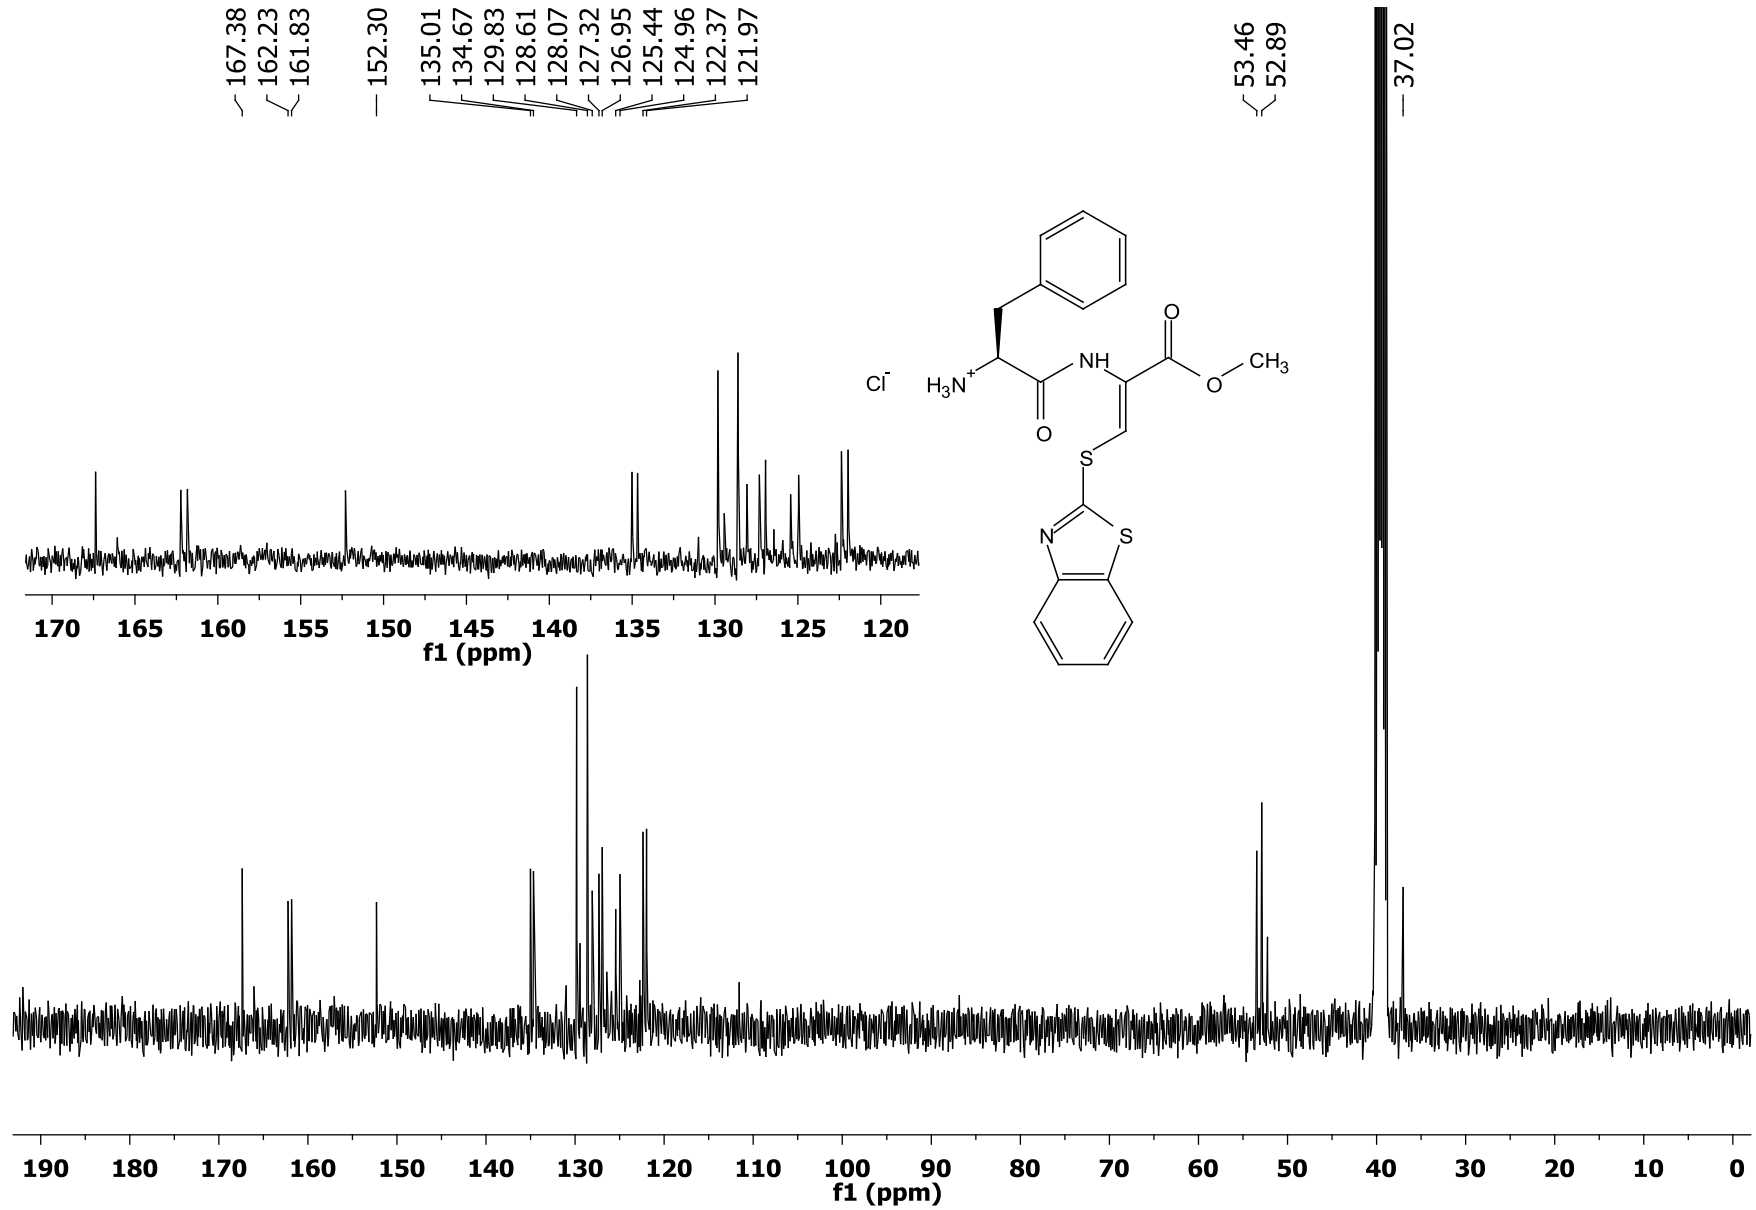

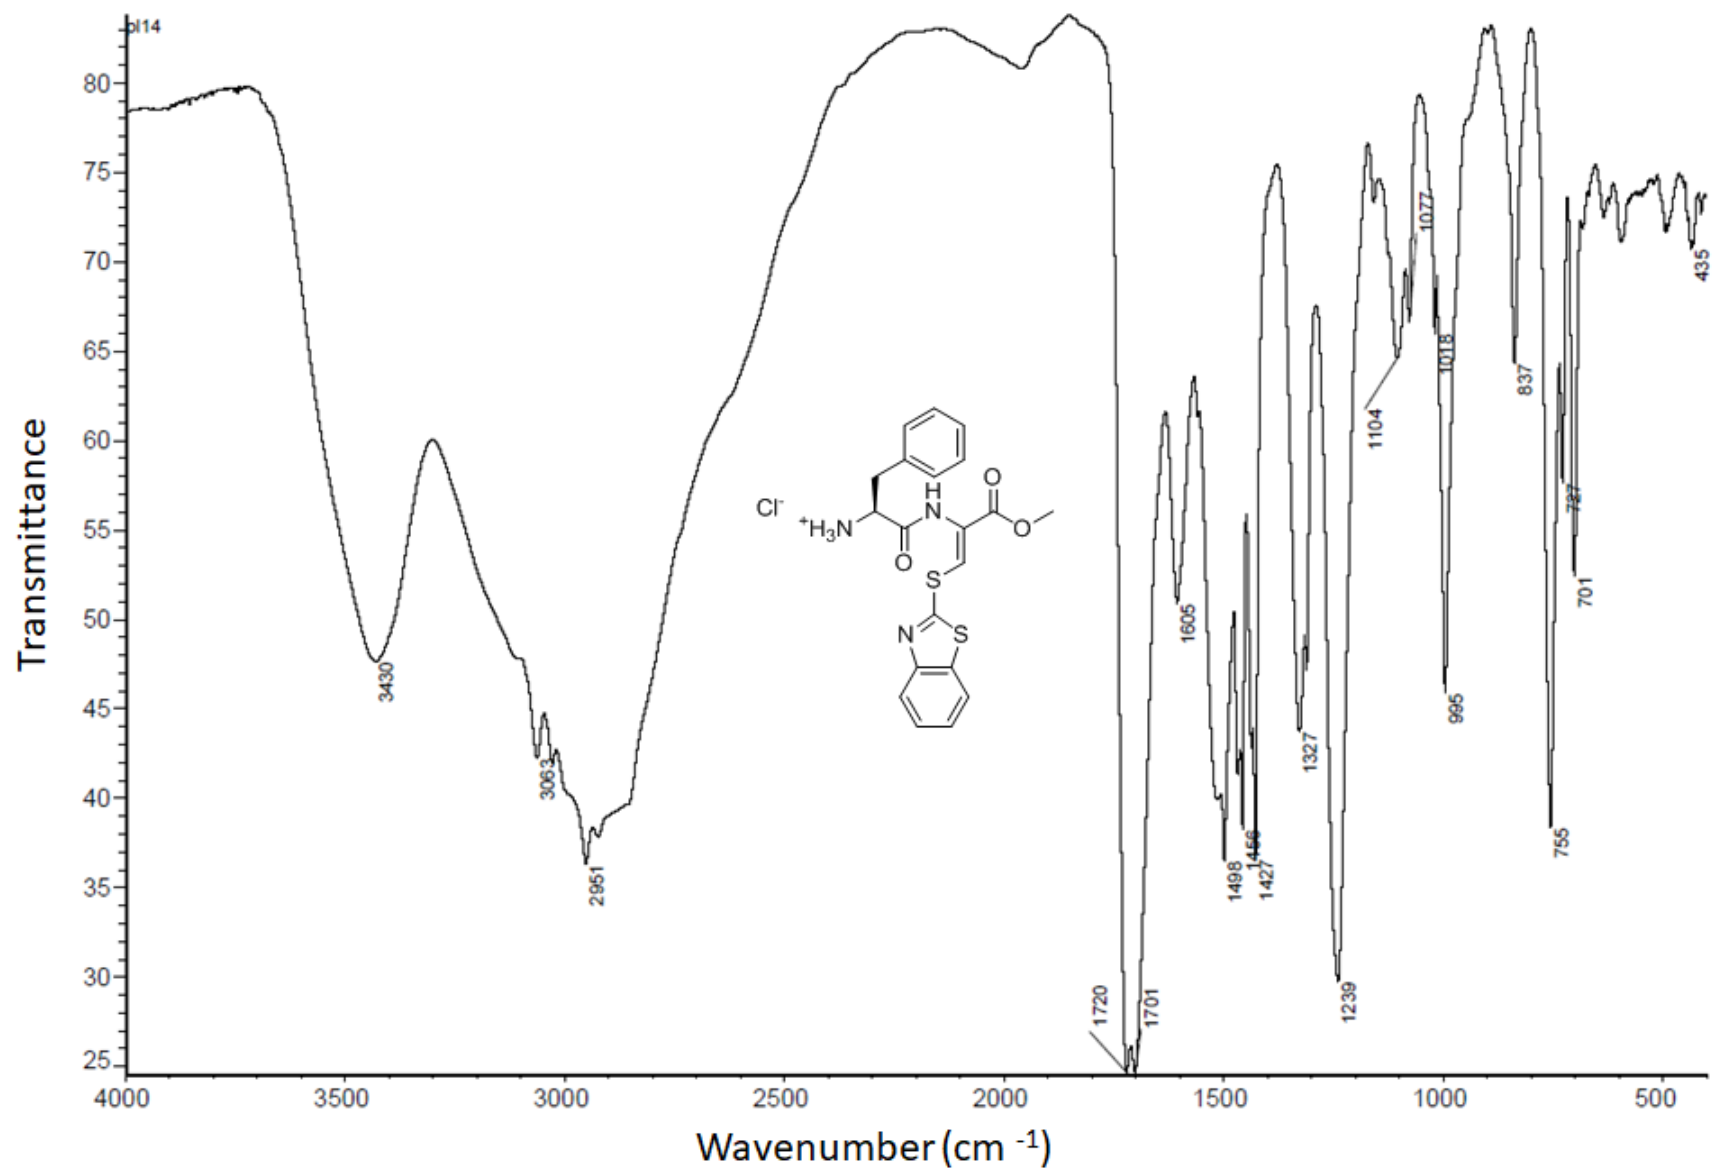

Supplement: ijms-22-02168-s001.pdf [file ijms-22-02168-s001.pdf]
